# Supplementary material for: Integrating nurses’ experiences with supporting behaviour change for cardiovascular prevention into a self-management internet platform in Finland and the Netherlands: a qualitative study
Source: PubMed Central journal article supplement (PMC6577411; doi:10.1136/bmjopen-2018-023480), 2019-06-06
Supplement: bmjopen-2018-023480.draft_revisions.pdf [file bmjopen-2018-023480.draft_revisions.pdf]

# BMJ Open

BMJ Open is committed to open peer review. As part of this commitment we make the peer review history of every article we publish publicly available.

When an article is published we post the peer reviewers' comments and the authors' responses online. We also post the versions of the paper that were used during peer review. These are the versions that the peer review comments apply to.

The versions of the paper that follow are the versions that were submitted during the peer review process. They are not the versions of record or the final published versions. They should not be cited or distributed as the published version of this manuscript.

BMJ Open is an open access journal and the full, final, typeset and author-corrected version of record of the manuscript is available on our site with no access controls, subscription charges or pay-per-view fees (<http://bmjopen.bmj.com>).

If you have any questions on BMJ Open's open peer review process please email [info.bmjopen@bmj.com](mailto:info.bmjopen@bmj.com)

# BMJ Open

## Integrating nurses' experiences with supporting behaviour change for cardiovascular prevention into a self-management internet-platform in Finland and the Netherlands: a qualitative study

|                               |                                                                                                                                                                                                                                                                                                                                                                                                                                                                                                                                                                                                                                                                                                                                                                                                                                                                                                                                                                                                                                                                                                                                                                                                                 |
|-------------------------------|-----------------------------------------------------------------------------------------------------------------------------------------------------------------------------------------------------------------------------------------------------------------------------------------------------------------------------------------------------------------------------------------------------------------------------------------------------------------------------------------------------------------------------------------------------------------------------------------------------------------------------------------------------------------------------------------------------------------------------------------------------------------------------------------------------------------------------------------------------------------------------------------------------------------------------------------------------------------------------------------------------------------------------------------------------------------------------------------------------------------------------------------------------------------------------------------------------------------|
| Journal:                      | <i>BMJ Open</i>                                                                                                                                                                                                                                                                                                                                                                                                                                                                                                                                                                                                                                                                                                                                                                                                                                                                                                                                                                                                                                                                                                                                                                                                 |
| Manuscript ID                 | bmjopen-2018-023480                                                                                                                                                                                                                                                                                                                                                                                                                                                                                                                                                                                                                                                                                                                                                                                                                                                                                                                                                                                                                                                                                                                                                                                             |
| Article Type:                 | Research                                                                                                                                                                                                                                                                                                                                                                                                                                                                                                                                                                                                                                                                                                                                                                                                                                                                                                                                                                                                                                                                                                                                                                                                        |
| Date Submitted by the Author: | 27-May-2018                                                                                                                                                                                                                                                                                                                                                                                                                                                                                                                                                                                                                                                                                                                                                                                                                                                                                                                                                                                                                                                                                                                                                                                                     |
| Complete List of Authors:     | Beishuizen, Cathrien; Academic Medical Center, General Practice<br>Akenine, Ulrika; Karolinska Institutet and Karolinska University Hospital, Division of Clinical Geriatrics , Department of Neurobiology, Care Sciences and Society<br>Barbera, Mariagnese; University of Eastern Finland, Clinical Medicine/Neurology<br>Rosenberg, Anna; University of Eastern Finland, Clinical Medicine/Neurology<br>Fallah Pour, Mandana; Karolinska Institutet, Division of Occupational Therapy, Department of Neurobiology, Care Sciences and Society<br>Richard, Edo; Academic Medical Centre, University of Amsterdam, Neurology; Radboud University Medical Center, Department of Neurology, Donders Institute for Brain, Cognition and Behaviour<br>Soininen, Hilikka; University of Eastern Finland, Clinical Medicine/Neurology<br>Mangialasche, Francesca; Karolinska Institutet, Division of Geriatric Epidemiology<br>Kivipelto, Miia; Karolinska Institutet, Division of Geriatric Epidemiology; University of Eastern Finland, Clinical Medicine/Neurology<br>Pols, A.; AMC, Department of General Practice, Section of Medical Ethics, Moll van Charante, Eric; Academic Medical Center, General Practice |
| Keywords:                     | QUALITATIVE RESEARCH, PRIMARY CARE, Nurse-led care, eHealth, Cardiovascular prevention, Dementia prevention                                                                                                                                                                                                                                                                                                                                                                                                                                                                                                                                                                                                                                                                                                                                                                                                                                                                                                                                                                                                                                                                                                     |
|                               |                                                                                                                                                                                                                                                                                                                                                                                                                                                                                                                                                                                                                                                                                                                                                                                                                                                                                                                                                                                                                                                                                                                                                                                                                 |

SCHOLARONE™  
Manuscripts

# Integrating nurses' experiences with supporting behaviour change for cardiovascular prevention into a self-management internet-platform in Finland and the Netherlands: a qualitative study

## Authors

Beishuizen CRL<sup>1\*</sup>, Akenine U<sup>2</sup>, Barbera M<sup>3</sup>, Rosenberg A<sup>3</sup>, Fallahpour M<sup>4</sup>, Richard E<sup>5,6</sup>, Soininen H<sup>3,7</sup>, Mangialasche F<sup>8</sup>, Kivipelto M<sup>2, 3,9</sup>, Pols AJ<sup>10</sup> and Moll van Charante EP<sup>1</sup>

\*corresponding author

address: Department of General Practice  
Academic Medical Centre/University of Amsterdam  
Meibergdreef 9, 1100 DD  
Amsterdam, Netherlands

email: [c.r.beishuizen@amc.uva.nl](mailto:c.r.beishuizen@amc.uva.nl)

phone: +31 6 16359453

## Affiliations

<sup>1</sup> Department of General Practice, Academic Medical Centre, University of Amsterdam Amsterdam, The Netherlands

<sup>2</sup> Division of Clinical Geriatrics, Department of Neurobiology, Care Sciences and Society, Karolinska Institutet, and Karolinska University Hospital, Stockholm, Sweden

<sup>3</sup> Institute of Clinical Medicine/Neurology, University of Eastern Finland, Kuopio, Finland

<sup>4</sup> Department of Neurobiology Care Sciences and Society, Division of Occupational Therapy, Karolinska Institutet, Huddinge, Sweden

<sup>5</sup> Department of Neurology, Academic Medical Centre, University of Amsterdam, Amsterdam, The Netherlands

<sup>6</sup> Department of Neurology, Donders Institute for Brain, Cognition and Behaviour, Radboud University Medical Center, Nijmegen, The Netherlands

<sup>7</sup> Neurocenter, Neurology, Kuopio University Hospital, Kuopio, Finland.

<sup>8</sup> Aging Research Center, Karolinska Institutet and Stockholm University, Stockholm, Sweden

<sup>9</sup> Chronic Disease Prevention Unit, National Institute for Health and Welfare, Helsinki, Finland

<sup>10</sup> Section of Medical Ethics, Department of General Practice, Academic Medical Centre, University of Amsterdam, Amsterdam, The Netherlands

## Word count

Total text (main text and quotations): 4,254

## Abstract

**Objectives:** Global ageing is linked to an increased burden of cardiovascular disease (CVD) and dementia, which calls for better prevention strategies. Self-management and eHealth applications are regarded promising strategies to support prevention. The aim of this study was to explore primary care nurses' experiences with behaviour change guidance for cardiovascular (CV) prevention to learn how to optimally integrate these into an internet-platform with coaching for cardiovascular self-management.

**Design:** Qualitative focus group study in Finland and the Netherlands.. Discussions were audiotaped and transcribed. Data were thematically analysed following grounded theory.

**Setting:** Dutch and Finnish primary care settings.

**Participants:** Six Finnish and seven Dutch nurses experienced in CV prevention

**Results:** Finnish and Dutch nurses expressed similar experiences with supporting behaviour change for CV prevention but used different practical approaches, which was reflected in their recommendations for online-support. Both groups emphasised that online-support should be combined with human-support and integrated in regular care. Finnish nurses had more confidence in patient self-management and remote communication than Dutch nurses, who emphasised the importance of face-to-face contact and preferred to keep the control on medical aspects of prevention.

**Conclusions:** Differences in CV prevention support of Dutch and Finnish nurses appear to reflect their local healthcare practices, which should be taken into account when designing internet-platforms for health self-management. Including cognitive health as a goal of CV prevention might stimulate people's motivation for health behaviour change.

**Keywords:** cardiovascular prevention, dementia prevention, behaviour change, eHealth, primary care, nurse-led care, qualitative research

### Strengths and limitations of this study

- We performed an international qualitative study and made a direct comparison of the experiences and health care practices of Finnish and Dutch primary care nurses within their healthcare contexts.
- This study provides directions for innovative forms of preventive healthcare, by having experienced nurses translate their current best practices of health behaviour change support towards an online health-support setting.
- Our findings might be limited to health care settings that resemble Finnish and Dutch cardiovascular preventive care organisation.

## Manuscript

### INTRODUCTION

Global ageing places an increasing demand on healthcare systems, partially due to the absolute rise in cardiovascular disease (CVD) and dementia cases<sup>1,2</sup>. As these disorders share a number of risk factors, effective cardiovascular (CV) prevention could also lead to the prevention of dementia<sup>3-6</sup>. CV prevention requires health behaviour change, the process of “initiating and maintaining behaviours that reduce health risks and control existent chronic disease”<sup>7</sup>. In CV prevention, core behaviours consist of a healthy lifestyle (healthy diet, sufficient physical activity and non-smoking) and adherence to medication. Although the processes behind supporting health behaviour change have been theorised extensively<sup>8-12</sup>, putting them into practice remains a challenge<sup>13,14</sup> and novel, more effective, approaches are needed<sup>15</sup>. Two strategies of current interest are self-management and eHealth. In self-management, the individual, instead of the healthcare professional, takes the lead in the management of his/her risk factors and adherence, and therefore in behaviour change<sup>16,17</sup>. eHealth applications can easily support self-management and are attractive because of their wide reach, low-cost and suitability for health education<sup>18,19</sup>. Although researchers and policymakers have high expectations of eHealth and self-management, little is known of how self-management and behaviour change are best stimulated and maintained online.

This project is part of the Healthy Ageing Through Internet Counselling in the Elderly (HATICE) study, which includes a European randomised controlled trial testing a coach-supported internet-platform for self-management of cardiovascular risk factors in older people to prevent CVD and cognitive decline<sup>20</sup>. In an international focus group study, we aimed to explore (1) nurses’ experiences and practices with behaviour change guidance for cardiovascular prevention, including the potential for dementia prevention, and (2) how to integrate their practices into a coach-supported internet-platform (the online-support setting). This study took place in Finland and the Netherlands, two of the three countries where the HATICE-study is ongoing. Since the HATICE project aims to develop an internet-platform that is implementable across all European healthcare systems, we also explored the influence of local healthcare practices.

## METHODS

We performed an international qualitative focus group study following grounded theory<sup>21 22</sup>. The COREQ-checklist is included for complete information on methodology (**Appendix 1**)<sup>23</sup>.

### Participants and setting

Finnish and Dutch primary care nurses experienced in cardiovascular preventive care were eligible for this study and selective purposive samples were obtained, following one of the grounded theory methods; i.e. studying a health care practice by consulting field experts<sup>24</sup>. In Finland, we recruited occupational healthcare nurses because of their important role in preventive CV care. Nurses working in a semi-private healthcare centre in Kuopio (Eastern Finland) were invited and six female nurses consented to participate. Being occupational health nurses they cared mostly for patients in the working age. In the Netherlands, we recruited primary care nurses experienced in cardiovascular risk management. A group of 32 nurses working in general practices in two urban areas in the centre of the Netherlands was invited and seven female nurses consented to participate. The Dutch participating nurses cared for patients of all ages. **Table 1** contains further characteristics.

**Table 1.** Characteristics of the participating Finnish and Dutch nurses

| Nr | Coun try* | Age | Education                                  | Experience (years) | Typ of CVD prevention | Additional expertise             | Internet use at work                            |
|----|-----------|-----|--------------------------------------------|--------------------|-----------------------|----------------------------------|-------------------------------------------------|
| 1  | FI        | 55  | occupational health nurse                  | 33                 | prim/sec prev         | psychology and stress            | email, guideline use, referral, patient contact |
| 2  | FI        | 42  | occupational health nurse                  | 20                 | prim/sec prev         | none                             | email, guideline use, referral                  |
| 3  | FI        | 25  | occupational health nurse                  | 2                  | prim/sec prev         | none                             | email, guideline use, referral, patient contact |
| 4  | FI        | 45  | occupational health nurse                  | 15                 | prim/sec prev         | mental health                    | email, guideline use, referral, patient contact |
| 5  | FI        | 49  | occupational health nurse                  | 23                 | prim/sec prev         | none                             | email, guideline use, referral, patient contact |
| 6  | FI        | 60  | occupational health nurse                  | 35                 | prim/sec prev         | mental health                    | guideline use, patient contact                  |
| 1  | NL        | 43  | general nurse, practice nurse <sup>a</sup> | 7                  | prim/sec prev         | DM, COPD, mental health, elderly | email, guideline use, referral, patient contact |
| 2  | NL        | 49  | practice nurse                             | 10                 | prim/sec prev         | DM, COPD, older people           | email, guideline use, referral, patient contact |
| 3  | NL        | 51  | practice nurse                             | 3                  | prim prev             | DM, COPD, older people           | email, guideline use, referral, patient contact |
| 4  | NL        | 53  | general nurse, practice nurse              | 6                  | prim/sec prev         | DM, COPD, older people           | email, guideline use, referral                  |
| 5  | NL        | 42  | practice nurse                             | 4                  | sec prev              | DM, COPD, older people           | email, guideline use, referral, patient contact |
| 6  | NL        | 45  | general nurse, practice nurse <sup>b</sup> | 11                 | prim/sec prev         | DM, COPD, older people           | email, guideline use, referral, patient contact |
| 7  | NL        | 65  | general nurse, practice nurse              | 11                 | prim/sec prev         | none                             | email, guideline use, referral, patient contact |

\*abbreviations: CVD = cardiovascular disease, FI = Finland, prim = primary, sec = secondary, prev = prevention, NL = the Netherlands, DM = diabetes mellitus, COPD = chronic obstructive pulmonary disease

<sup>a</sup> practice nurse: received specific nursing training to work in the general practice

<sup>b</sup> general nurse: received general nursing training to work as a general nurse in the hospital

The study was presented to the medical ethics committee of the Academic Medical Centre in the Netherlands and a waiver was provided. In Finland, application for ethical approval nor a waiver were required. All participants provided written informed consent.

### Data collection

We conducted one focus group in the Netherlands (autumn 2013) and one in Finland (December 2015). In each country, an experienced focus group moderator chaired the sessions, while an assistant-moderator noted non-verbal communication and summarised the discussions. The discussion was conducted using a topic list as reference (**Box 1** and **Appendix 2**). After the Dutch session, the topic list was refined for the Finnish focus group. The moderators asked open-ended questions, following grounded theory to inductively approach the data. Both moderators first discussed the nurses' activities in cardiovascular prevention and how they supported their patients in the process of behaviour change. The Finnish moderator also discussed the nurses' experiences on prevention of dementia. In the second part, the HATICE internet-platform was presented (**Box 2**, a full description of the platform is reported elsewhere<sup>25</sup>) and the nurses were asked how they would optimally support their patients in an online setting. Both sessions lasted approximately two hours. The discussions were audio-recorded and transcribed.

**Box 1.** Main topics discussed

**Box 2.** Key features of the HATICE internet-platform with coaching

### Coding and analysis

In each country, two researchers coded and thematically analysed the transcripts following grounded theory<sup>21 22</sup>. Themes were derived inductively from the data and were not hypothesised beforehand. Open coding and identification of initial themes was first performed by the two researchers independently. Thereafter, codes and themes were compared. Dissimilarities were discussed until consensus was reached. Initial theme structure was then discussed with the senior researchers involved. In Finland, since the researchers were not Finnish native speakers, the transcript was translated into English and cross-checked by the Finnish focus group moderator, who was a Finnish native fluent English speaker. In this way, the complete analysis of the Finnish data could be performed in English. After the initial analysis performed locally, themes and corresponding

1  
2  
3 quotations of the Dutch sessions were also translated into English. The two research teams then had  
4 two meetings to discuss the structure of main themes and categories. The analysis-phase<sup>21 22</sup> was an  
5 iterative process, during which the researchers of both teams repeatedly returned to their data-files to  
6 add, merge and refine themes, until a definite theme structure was agreed on by all authors. During the  
7 iterative analysis-phase, the researchers discussed the themes and alternatives and it was proposed that  
8 the local health care context was of influence on the differences found between caring styles of the two  
9 groups of nurses. Therefore, the research teams introduced their local health care systems (**Box 3**) to  
10 each other and these insights were used in further interpretation of the findings. A summary of the  
11 final conclusions was returned to the participants for feedback.  
12  
13  
14  
15

16  
17 **Box 3.** The Finnish and Dutch primary care systems  
18  
19

### 20 **Patient and public involvement**

21 Patients and public were not involved in the design of this study.  
22  
23  
24

## 25 **RESULTS**

26 We present our findings in two sections: 1) Nurses experiences and practices with supporting the  
27 process of behaviour change for cardiovascular prevention, including the potential for dementia  
28 prevention, and 2) Their suggestions on how to integrate their experiences in an online-support setting.  
29  
30

### 31 **Part 1: Nurses experiences and practices with supporting the process of behaviour change for** 32 **cardiovascular prevention** 33 34 35

#### 36 **Preconditions for behaviour change guidance**

37 We identified three main themes, that both the Finnish and Dutch nurses regarded as preconditions for  
38 behaviour change guidance in their patients: establishing a relation of trust, awareness and expectation  
39 management and appropriate timing and monitoring. Both groups of nurses explained what skills they  
40 used to realise these preconditions, showing subtle differences between the groups.  
41  
42  
43  
44

#### 45 *Establishing a relationship of trust*

46 According to both the Finnish and Dutch nurses, the basis of behaviour change support lied in  
47 establishing a relationship of trust with the patient: developing a good nurse-patient relationship in  
48 which the individual felt at ease and respected and comfortable enough to open up about lifestyle and  
49 behaviour issues:  
50  
51  
52  
53  
54  
55  
56  
57  
58  
59  
60



1  
2  
3  
4  
5  
6  
7  
8  
9  
10  
11  
12  
13  
14  
15  
16  
17  
18  
19  
20  
21  
22  
23  
24  
25  
26  
27  
28  
29  
30  
31  
32  
33  
34  
35  
36  
37  
38  
39  
40  
41  
42  
43  
44  
45  
46  
47  
48  
49  
50  
51  
52  
53  
54  
55  
56  
57  
58  
59  
60

*“For lifestyle change, for prevention, a relationship based on mutual trust is pivotal. It is good to have a many years' standing contact with people. Then you know what is going on in someone's life and in that, some kind of trust will grow that people really start believing what you are saying to them. And then, over time, people will start practising healthy behaviours that maybe they had no intention to follow, in the beginning” (Dutch nurse 1)*

Skills the nurses used to stimulate trust to grow, were personalising and tailoring their support to each patient:

*“And you need to get a good picture of the situation, so that you don't give the same information to everyone. That's of no use. You need to think what the central issues are for this patient. What are the things he or she seems to have resources for? What are the goals that the client sets? What is the client able to do, and with what kind of intensity? What will the time span be like? And I also ask my client directly that what kind of support does he or she wishes? I'm trying to offer what the client thinks he or she needs” (Finnish nurse 1)*

Interestingly, the nurses had different preferences for modes of communication. The Dutch nurses emphasized face-to-face contact and in-person continuity. The Finnish nurses preferred an initial face-to-face consultation but were comfortable with further phone or email contact and did not regard this as less personal than face-to-face contact. Email contact also had advantages:

*“But sometimes this kind of communication online could be less complicated...than face to face.”(Finnish nurse 5)*

*“I have noticed in my work that some people prefer contacting me by e-mail and not by phone. [others agree] On the phone they might think that they are disturbing or it's a bad timing, but one can write an e-mail or something anytime.” (Finnish nurse 3)*

#### *Awareness and expectation management*

A second precondition was awareness and expectation management: checking the patients' level of knowledge and expectations regarding prevention and personal cardiovascular risk. Nurses thought that most patients had considerable knowledge of cardiovascular disease prevention, especially in Finland, due to a long standing tradition in community based cardiovascular prevention (the North-Karelia project <sup>26</sup>). Nonetheless, both groups of nurses had the experience that people were not especially aware of their personal cardiovascular risk status:

*“That's it, isn't it, for many people their health is not a concern yet. You can list them the facts, and they hear and read it everywhere, that it is unhealthy to have overweight and that they need to exercise more, but right now, they are not yet bothered by it.” (Dutch nurse 6)*

1  
2  
3 Because of this lack of a sense of urgency, the nurses regarded the ability to educate their patients  
4 about consequences of health behaviours an essential skill of their profession. Once awareness and  
5 motivation had grown, people often had unrealistic expectations and the nurses needed to act as “*myth*  
6 *busters*” (Finnish nurse 4):  
7  
8  
9

10  
11 *“And when we are, however, not able to offer the magic pills or wonder tricks, the clients*  
12 *may sometimes be disappointed when all I can suggest is these boring methods: diet and physical*  
13 *activity. And we cannot offer them a magic solution.”* (Finnish nurse 4)  
14

15  
16 Often, once people were motivated to change their health behaviours, they also tended to set  
17 unrealistic goals, which the nurses then had to reshape:  
18  
19

20  
21 *“Start small. Do not make it too big. If you are obese, many people do not like it to go to the*  
22 *gym, they think the gym is only for lovely slim figures. You cannot convince them that that’s not*  
23 *true. Therefore it is important: try things first yourself. What can you do with small steps at home*  
24 *by yourself, before going outside. You have to start liking exercise.”* (Dutch nurse 3)  
25

26  
27 Lastly, the nurses actively prepared their patients for failures during the process of behaviour change,  
28 as these were seen as inevitable:  
29  
30

31  
32 *“I usually tell the patients that they’re allowed to fail; but even so, they are invited to, and*  
33 *they should come to the appointments. So then we can check the situation again, and set a new goal*  
34 *if needed.”* (Finnish nurse 1)  
35

36  
37 With the Finnish nurses, coaching on cardiovascular risk was also related to the potential for dementia  
38 prevention. They suggested that many patients feared dementia and lacked knowledge about the  
39 disease and treatment and prevention options, creating a stigma towards this condition. The nurses  
40 were aware of the link between cardiovascular disease and dementia, but felt they lacked sufficient  
41 knowledge and training to provide proper support:  
42  
43  
44  
45

46  
47 *“Well, we have not had the knowledge of reasons for dementia for that long. And these*  
48 *connections haven’t been...the research is recent: well, at least more recent than the research about*  
49 *heart diseases.”* (Finnish nurse 5)  
50

51  
52 They found that educating patients on the link between cardiovascular disease and dementia, would be  
53 a good starting point to raise awareness. Potentially, this could enhance motivation for CV prevention:  
54  
55  
56  
57  
58  
59

1  
2  
3  
4  
5  
6  
7  
8  
9  
10  
11  
12  
13  
14  
15  
16  
17  
18  
19  
20  
21  
22  
23  
24  
25  
26  
27  
28  
29  
30  
31  
32  
33  
34  
35  
36  
37  
38  
39  
40  
41  
42  
43  
44  
45  
46  
47  
48  
49  
50  
51  
52  
53  
54  
55  
56  
57  
58  
59  
60

*“What is good for the heart - and we know what’s good for the heart – is also good for the brain but not everyone knows this. I think this link would be good to be aware of: you protect your heart but also the most important part of your body which is the brain.” (Finnish nurse 4)*

#### *Appropriate timing and monitoring*

The third precondition mentioned by the nurses was appropriate timing and monitoring: providing professional support at appropriate times and monitoring the progress of the patient towards behaviour change. Regular follow-up appointments stimulated adherence and motivation:

*“After three months, your plan fades away, your goal, your motivation.” (Dutch nurse 3).*

*“..that there is a possibility for follow-up. Usually it motivates people when someone looks after you: how are you progressing, no matter if the target is, for example, smoking cessation or increasing of physical activity.” (Finnish nurse 5)*

Monitoring ensured that the nurses could support their patients when experiencing obstacles or failures, although this could be difficult:

*“Disappointments also play a role. For example: a guy with diabetes, he quit smoking but then his sugar levels went up and he needed to start with insulin. How do you explain that [to him]? Well, I challenge you to keep his attitude up and to maintain his motivation.” (Dutch nurse 5)*

When discussing monitoring lifestyle behaviours both nurse groups attributed themselves a supportive role putting the patient in charge, because lifestyle was seen as the personal domain of the patient. However, regarding the medical components of preventive care (control of hypertension, diabetes and hypercholesterolemia), the Dutch nurses attributed a more directive role to themselves and the medical practice to avoid mistakes and complications, whereas the Finnish nurses regarded their patients as capable of staying in charge.

## **Part 2: Integrating the nurses’ strategies into an online-support setting**

After having identified the preconditions for optimal behaviour change support and the skills nurses use in their current practices, we demonstrated the latest version of the HATICE internet-platform<sup>25</sup> and discussed the online-support setting. Both groups of nurses emphasised the importance of the aforementioned preconditions for optimal online support:

#### *Establishing a relationship of trust*

All nurses regarded the presence of a coach as essential to guarantee personal support. The Finnish

nurses felt that online coaching could successfully establish a relationship of trust, provided that the coach was a real person:

*“Because of this social interaction on this website [the HATICE platform], the participant has a familiar and friendly person [as a coach] and not just some distant virtual coach who is a stranger. [...] it’s good that this combines the real-life person with the online contact, maybe it feels more comfortable and familiar [for the participant].” (Finnish nurse 4)*

An initial face-to-face consultation with the patient could strengthen the establishment of a good relationship. Overall, for the Finnish nurses, online support was an obvious step forward in innovating healthcare:

*“Well at least I think that this is absolutely the trend [others nod and agree], that all the services will be at least partly available online for the patients. Partly like this [via internet] and partly with human contact. I think that it’s an inevitable part of future.” (Finnish nurse 1)*

In contrast, the Dutch nurses could not imagine the platform and coach fully substituting their personal guidance:

*“The strength of our guidance is the personal contact we have with the patients. [...] that enables us to give them some subtle support and give them a small push into the right direction. To delegate all of that to an online coach just like that, that seems difficult to me. Then all personal contact will disappear.” (Dutch nurse 7)*

#### *Awareness and expectation management*

All nurses regarded the internet-platform a suitable mean to raise awareness and increase health-literacy. Managing expectations related to online support was considered very important, because misunderstandings could arise more easily through this mean. Therefore, the coach should explain what could be expected from the platform and their support:

*“Communication is very important in the beginning:, what is it we do and what do they expect from the goals.” (Dutch nurse 1)*

#### *Appropriate timing and monitoring*

The nurses envisioned that online, the patient would be in charge of timing of support and monitoring of progress. The coach would have a reactive role, providing support in response to the patient’s

1  
2  
3 demand. However, the nurses felt the coach also needed to be proactive, in case people showed signs  
4 of losing motivation. This would require insight in people's platform activities:  
5  
6

7  
8 *"[...] the nurse can also see it [the diary] and check. If the participant fails to achieve the*  
9 *goals, the nurse can go back and check what might have been the problem."* (Finnish nurse 5)  
10

11  
12 Both groups thought the platform should be aligned to regular healthcare. The Finnish nurses  
13 envisioned that the online coach could work in the same fashion as the nurses currently did, targeting  
14 both lifestyle and medical components of their patient's health. The Dutch nurses stressed that not  
15 everybody would be able to self-manage, especially when it concerned medical issues. Therefore, they  
16 preferred a platform focusing on lifestyle only, keeping the control of medical issues in the medical  
17 practice:  
18  
19  
20  
21  
22

23  
24 *"I think 2 or 3 types of platform users will arise: people who really get the concept of self-*  
25 *management (and start coaching themselves), people who need the coach (and give the coach*  
26 *access to their complete profile) and a group in between, alerting the coach if a goal has not been*  
27 *met."* (Dutch nurse 2)  
28  
29  
30  
31  
32  
33  
34  
35  
36  
37  
38  
39  
40  
41  
42  
43  
44  
45  
46  
47  
48  
49  
50  
51  
52  
53  
54  
55  
56  
57  
58  
59  
60

## DISCUSSION

### Principal findings and interpretation

In this international focus group study, we identified three main themes that both the Finnish and Dutch nurses emphasised as most important preconditions for behaviour change support in cardiovascular prevention, and potentially, prevention of cognitive decline: (1) establishing a relationship of trust, (2) managing awareness and expectations and (3) appropriate timing and monitoring of the process of behaviour change. They regarded these preconditions equally important for optimal online support and stressed that a coach providing human support and integration with regular care were essential elements to achieve this. They expressed, however, different ideas on its implementation (**Figure 1**).

**Figure 1.** Schematic visualization of the main themes and their connections

As mentioned in the introduction, realising and maintaining health behaviour change is notoriously complex. This was confirmed by the nurses we interviewed, but their clinical experience provided us with clear preconditions for optimal behaviour change support. The nurses used slightly different approaches to fulfil these preconditions, both in their current practice and in their ideas on online support. To establish a relationship of trust, the Dutch nurses relied more on face-to-face contact than the Finnish nurses, which appeared to make them more sceptical about the effectiveness of online coaching. The Finnish nurses took a mainly supportive role in monitoring whereas Dutch nurses emphasised a more directive role for themselves and the general practice, with regard to medical aspects of preventive guidance. As **Box 3** shows, the aims of preventive care are very similar between Finland and the Netherlands, with similar roles for primary healthcare nurses. This may explain why the nurses came up with similar preconditions for optimal support of behaviour change. Nevertheless, the differences we found in their current approaches and in their ideas for online support may reflect differences in culture, local healthcare organisation and geography. For example, the nurses' ideas about their own responsibilities and patient autonomy may be aligned to the way patient-autonomy is being shaped in the two healthcare systems as well as to description of nurses' responsibilities in local cardiovascular risk management guidelines. The different attitudes on face-to-face contact can be understood from the perspective of geography. Finland is a large but very sparsely populated country and the Netherlands are a very small but densely populated country. The large distances between patient and health care provider in Finland can make telephone and email contact an attractive alternative for face-to-face consultations. Our results concerning dementia prevention are of special interest. The Finnish nurses liked the idea of including cognitive health as a goal for cardiovascular preventive care, as dementia was regarded a growing public health problem and a combined approach could enlarge people's motivation to engage in behaviour change. However, the nurses felt they could

1  
2  
3 not provide proper support, given their limited knowledge and training on one hand, and limited extent  
4 of final scientific evidence on the other.  
5  
6

### 7 **Comparison with existing literature**

8 The experiences of the nurses with behaviour change support were comparable to those described in  
9 qualitative studies in other European countries with similar cardiovascular preventive care and as  
10 described by Dutch patients<sup>27-31</sup>. The positive attitude of the Finnish nurses on self-management of  
11 medical issues was consistent with another Finnish study about nurses' and physicians' perceptions on  
12 patient's responsibilities in self-care<sup>32</sup>. The reserved attitude of the Dutch nurses was also reflected in  
13 a survey among Dutch healthcare professionals, where 50% feared that patient's direct access to their  
14 medical record would cause misunderstandings and unnecessary anxiety<sup>33</sup>. Finally, the conviction of  
15 all nurses that a coach was essential to complement the internet-platform, is supported by a meta-  
16 analysis we performed showing that internet-interventions combined with human support were more  
17 effective than 'stand-alone' interventions<sup>34</sup>.  
18  
19  
20  
21  
22  
23  
24

### 25 **Strengths and limitations**

26 The HATICE project is novel in its aim to develop a generic innovative cardiovascular prevention  
27 strategy for older people that can be used across European healthcare systems, especially since it  
28 involves eHealth. In qualitative research, international joint analyses are not common because of  
29 language barriers. To overcome these, we put much effort in the alignment of our research  
30 methodology. The frequent interactions and extensive meetings of the research teams enabled us to  
31 explore our findings in the context of the local health care systems. Following grounded theory  
32 methodology<sup>24</sup>, we deliberately selected nurses that we regarded experts in cardiovascular preventive  
33 care. The patient populations of the Finnish and Dutch nurses were not identical with respect to age,  
34 which may have influenced our findings. However, since both groups of nurses had comparable  
35 experience with cardiovascular prevention and both countries have similar aims for cardiovascular  
36 prevention we deem the selection of these nurses appropriate for our research purpose. In addition, the  
37 variety in our samples regarding age and clinical experience was large. Since we only performed two  
38 focus groups, we cannot exclude that a wider range of views could have been collected. For example,  
39 one might expect that themes related to training and education requirements would have emerged  
40 more prominently from the discussions, but this issue only was mentioned with regard to cognitive  
41 health. This issue could be elaborated further in future studies. Further, the striking similarities in the  
42 principal themes found in both countries and the consistency of our findings with previous literature  
43 mitigates fears that our samples were too limited. Last, when reviewing a summary of our findings, the  
44 nurses confirmed that their experiences and views were reflected and did not add new ones,  
45 emphasising that the most relevant themes were captured.  
46  
47  
48  
49  
50  
51  
52  
53  
54  
55  
56  
57  
58  
59  
60

### Implications for practice

Finnish and Dutch nurses have similar experiences with and views on supporting behaviour change for cardiovascular prevention, but use different practical approaches towards their patients. Including the maintenance of cognitive health as a goal of cardiovascular prevention might augment people's motivation to partake in health behaviour change. The nurses' experiences provide valuable directions for shaping online support in internet-platforms for cardiovascular self-management. This study also indicates that, when introducing new forms of preventive healthcare that involve patient self-management, like internet-platforms, local healthcare practices are to be taken into account to achieve optimal engagement.

For peer review only



## ADDITIONAL INFORMATION

### Contributors

Study design: CB, ER, EMvC, HS, FM and MK. Data acquisition: CB, MB and AR. Data analysis: CB, UA, MB and AR. Interpretation of results: CB, UA, MB, AR, FM, EMvC and JP. Drafting of the manuscript: CB. Critical revision of the manuscript for important intellectual content: all authors.

### Funding

The research leading to these results has received funding from the European Union Seventh Framework Programme for the HATICE-project (FP7/2007-2013, grant agreement n° 305374) and the Multimodal preventive trials for Alzheimer's Disease: towards multinational strategies – programme (MIND-AD: MIND-AD Academy of Finland (grant agreement n°291803), MIND-AD VTR, Kuopio University Hospital ((grant agreement n°5772815) and MIND-AD Academy of Sweden (Swedish Research Council, 529-2014-7503)) .

### Ethical approval

In the Netherlands, the study was presented to the medical ethics committee of the Academic Medical Centre in the Netherlands and a waiver was provided. In Finland, application for ethical approval nor a waiver were required. Written informed consent was obtained from all participants in both countries.

### Competing interests

The authors have declared no competing interests.

### Acknowledgements

We thank all Finnish and Dutch nurses for their participation in the study, Suzanne Ligthart, Carin Miedema, Paulien Vermunt, Floor Rooskens (respectively discussion moderator, assistant-moderator and assistants in transcription and coding for the Dutch meetings), Lotta Salo and Ejja Pietilä (organisation and summary notes of the Finnish meeting) for their assistance to the study.

## REFERENCES

1. Oliver D. 21st century health services for an ageing population: 10 challenges for general practice. *The British journal of general practice : the journal of the Royal College of General Practitioners* 2012;62(601):396-7. doi: 10.3399/bjgp12X653435 [published Online First: 2012/08/08]
2. Wu YT, Fratiglioni L, Matthews FE, et al. Dementia in western Europe: epidemiological evidence and implications for policy making. *The Lancet Neurology* 2016;15(1):116-24. doi: 10.1016/s1474-4422(15)00092-7 [published Online First: 2015/08/25]
3. de Bruijn RF, Bos MJ, Portegies ML, et al. The potential for prevention of dementia across two decades: the prospective, population-based Rotterdam Study. *BMC medicine* 2015;13:132. doi: 10.1186/s12916-015-0377-5 [published Online First: 2015/07/22]
4. Kivipelto M, Ngandu T, Laatikainen T, et al. Risk score for the prediction of dementia risk in 20 years among middle aged people: a longitudinal, population-based study. *The Lancet Neurology* 2006;5(9):735-41. doi: 10.1016/s1474-4422(06)70537-3 [published Online First: 2006/08/18]
5. Norton S, Matthews FE, Barnes DE, et al. Potential for primary prevention of Alzheimer's disease: an analysis of population-based data. *The Lancet Neurology* 2014;13(8):788-94. doi: 10.1016/s1474-4422(14)70136-x [published Online First: 2014/07/18]
6. Peters R, Beckett N, Forette F, et al. Incident dementia and blood pressure lowering in the Hypertension in the Very Elderly Trial cognitive function assessment (HYVET-COG): a double-blind, placebo controlled trial. *The Lancet Neurology* 2008;7(8):683-9. doi: 10.1016/s1474-4422(08)70143-1 [published Online First: 2008/07/11]
7. Leventhal H, Weinman J, Leventhal EA, et al. Health psychology: the search for pathways between behavior and health. *Annu Rev Psychol* 2008;59:477-505.
8. Rosenstock IM. The Health Belief Model and Preventive Health Behavior. *Health Education Monographs* 1974;2(4):354-86. doi: 10.1177/109019817400200405
9. Ajzen I. From Intentions to Actions: A Theory of Planned Behavior. In: Kuhl J, Beckmann J, eds. *Action Control: From Cognition to Behavior*. Berlin, Heidelberg: Springer Berlin Heidelberg 1985:11-39.
10. Bandura A. Self-efficacy: Toward a unifying theory of behavioral change. *Psychological Review* 1977;84(2):191-215. doi: 10.1037/0033-295X.84.2.191
11. Prochaska JO, DiClemente CC, Norcross JC. In search of how people change. Applications to addictive behaviors. *The American psychologist* 1992;47(9):1102-14. [published Online First: 1992/09/01]
12. Weinstein ND. The precaution adoption process. *Health Psychology* 1988;7(4):355-86. doi: 10.1037/0278-6133.7.4.355
13. Burke LE, Dunbar-Jacob JM, Hill MN. Compliance with cardiovascular disease prevention strategies: a review of the research. *Ann Behav Med* 1997;19(3):239-63.
14. Abraham C, Kelly MP, West R, et al. The UK national institute for health and clinical excellence public health guidance on behaviour change: A brief introduction. *Psychology, Health & Medicine* 2009;14(1):1-8. doi: 10.1080/13548500802537903
15. Busse R, Blümel M, Scheller-Kreinsen D, et al. Tackling chronic disease in Europe Strategies, interventions and challenges. *World Health Organization 2010, on behalf of the European Observatory on Health Systems and Policies* 2010;20
16. Bodenheimer TL, K.; Holman, H.; Grumbach, K. Patient Self-Management of Chronic Disease in Primary Care. *Jama* 2002;288(19):2469 - 75.
17. Lorig K, Holman H. Self-Management Education: History, Definition, Outcomes, and Mechanisms. *Ann Behav Med* 2003;26(1):1-7.
18. Griffiths F, Lindenmeyer A, Powell J, et al. Why are health care interventions delivered over the internet? A systematic review of the published literature. *Journal of medical Internet research* 2006;8(2):e10. doi: 10.2196/jmir.8.2.e10 [published Online First: 2006/07/27]
19. Bennett GG, Glasgow RE. The delivery of public health interventions via the Internet: actualizing their potential. *Annual review of public health* 2009;30:273-92. doi: 10.1146/annurev.publhealth.031308.100235 [published Online First: 2009/03/20]

20. Richard E, Jongstra S, Soininen H, et al. Healthy Ageing Through Internet Counselling in the Elderly: the HATICE randomised controlled trial for the prevention of cardiovascular disease and cognitive impairment. *BMJ Open* 2016;6(6):e010806. doi: 10.1136/bmjopen-2015-010806 [published Online First: 2016/06/12]
21. Glaser BG, Strauss AL. The discovery of grounded theory. *Aldine, Chicago* 1967
22. Strauss A, Corbin J. Grounded theory methodology. *Handbook of qualitative research* 1994:273-85.
23. Tong A, Sainsbury P, Craig J. Consolidated criteria for reporting qualitative research (COREQ): a 32-item checklist for interviews and focus groups. *International Journal for Quality in Health Care* 2007;19(6):349-57. doi: 10.1093/intqhc/mzm042
24. Foley G, Timonen V. Using Grounded Theory Method to Capture and Analyze Health Care Experiences. *Health Services Research* 2015;50(4):1195-210. doi: 10.1111/1475-6773.12275
25. Jongstra S, Beishuizen C, Andrieu S, et al. Development and Validation of an Interactive Internet Platform for Older People: The Healthy Ageing Through Internet Counselling in the Elderly Study. *Telemedicine journal and e-health : the official journal of the American Telemedicine Association* 2016 doi: 10.1089/tmj.2016.0066 [published Online First: 2016/07/28]
26. Puska P, Nissinen A, Tuomilehto J, et al. The community-based strategy to prevent coronary heart disease: conclusions from the ten years of the North Karelia project. *Annual review of public health* 1985;6:147-93. doi: 10.1146/annurev.pu.06.050185.001051 [published Online First: 1985/01/01]
27. Loon MS, van Dijk-de Vries A, van der Weijden T, et al. Ethical issues in cardiovascular risk management: Patients need nurses' support. *Nursing ethics* 2014;21(5):540-53. doi: 10.1177/0969733013505313 [published Online First: 2013/11/22]
28. Ligthart SA, van den Eerenbeemt KD, Pols J, et al. Perspectives of older people engaging in nurse-led cardiovascular prevention programmes: a qualitative study in primary care in the Netherlands. *The British journal of general practice : the journal of the Royal College of General Practitioners* 2015;65(630):e41-8. doi: 10.3399/bjgp15X683149 [published Online First: 2014/12/31]
29. Brobeck E, Bergh H, Odencrants S, et al. Primary healthcare nurses' experiences with motivational interviewing in health promotion practice. *Journal of clinical nursing* 2011;20(23-24):3322-30. doi: 10.1111/j.1365-2702.2011.03874.x [published Online First: 2011/10/25]
30. Boase S, Mason D, Sutton S, et al. Tinkering and tailoring individual consultations: how practice nurses try to make cardiovascular risk communication meaningful. *Journal of clinical nursing* 2012;21(17-18):2590-8. doi: 10.1111/j.1365-2702.2012.04167.x [published Online First: 2012/07/14]
31. Hornsten A, Lindahl K, Persson K, et al. Strategies in health-promoting dialogues--primary healthcare nurses' perspectives--a qualitative study. *Scandinavian journal of caring sciences* 2014;28(2):235-44. doi: 10.1111/scs.12045 [published Online First: 2013/04/19]
32. Jallinoja P, Absetz P, Kuronen R, et al. The dilemma of patient responsibility for lifestyle change: Perceptions among primary care physicians and nurses. *Scand J Prim Health Care* 2007;25(4):244-49. doi: 10.1080/02813430701691778
33. Krijgsman J, Peeters J, Burghouts A, et al. Between the spark and the flame: 2015 eHealth monitor. *Nictiz and the NIVEL Institute [Dutch Institute for Research in the Healthcare Sector]* 2015;October
34. Beishuizen CR, Stephan BC, van Gool WA, et al. Web-Based Interventions Targeting Cardiovascular Risk Factors in Middle-Aged and Older People: A Systematic Review and Meta-Analysis. *Journal of medical Internet research* 2016;18(3):e55. doi: 10.2196/jmir.5218 [published Online First: 2016/03/13]
35. Hämmäläinen P, Reponen J, Winblad I. eHealth of Finland - Checkpoint 2008. 2009
36. Säkkinen S, Heino A, Häkkinen P, et al. Statistical yearbook on social welfare and health care 2015 - National Institute for Health and Welfare. 2016
37. Vuorenkoski L, Mladovsky P, Mossialos E. Finland: Health system review. *Health Systems in Transition* 2008;10(4):1-168.
38. <http://www.kanta.fi/en> [Website of the Finnish Patient Data Repository, where Finnish people can access their own medical record]. accessed 7-12-2016 2016.

- 1  
2  
3  
4  
5  
6  
7  
8  
9  
10  
11  
12  
13  
14  
15  
16  
17  
18  
19  
20  
21  
22  
23  
24  
25  
26  
27  
28  
29  
30  
31  
32  
33  
34  
35  
36  
37  
38  
39  
40  
41  
42  
43  
44  
45  
46  
47  
48  
49  
50  
51  
52  
53  
54  
55  
56  
57  
58  
59  
60
39. <http://www.kaypahoito.fi/web/english/guidelineabstracts/guideline?id=ccs00014> [Finnish Current Care Guideline on hypertension (2014)]. accessed 7-12-2016 2016.
  40. <http://www.kaypahoito.fi/web/english/guidelineabstracts/guideline?id=ccs00032> [Finnish Current Care Guideline on diabetes (2016)]. accessed 7-12-2016 2016.
  41. <http://www.kaypahoito.fi/web/english/guidelineabstracts/guideline?id=ccs00055> [Finnish Current Care Guideline on dyslipidaemias (2013)]. accessed 7-12-2016 2016.
  42. Ministry of Public Health, Welfare and Sport - Healthcare in the Netherlands. 2016
  43. Schäfer W, Kroneman M, Boerma W, et al. The Netherlands: Health system review *Health Systems in Transition* 2010;12(1):1-229.
  44. Boomsma L, Lakerveld-Heyl K, Gorter K, et al. Landelijke Eerstelijns Samenwerkings Afspraak Diabetes mellitus type 2. *Huisarts Wet* 2006;49(8):418-24.
  45. den Boer J. Protocolair CVRM: Nederlands Huisartsen Genootschap 2016.
  46. Faber E, De Bont M, Beusmans G, et al. Landelijke Eerstelijns Samenwerkings Afspraak CVA. *Huisarts Wet* 2007;50(3):S5-S8.
  47. Kringos D, Boerma W, Bourgueil Y, et al. The strength of primary care in Europe: an international comparative study. *The British journal of general practice : the journal of the Royal College of General Practitioners* 2013;63(616):e742-e50. doi: 10.3399/bjgp13X674422

**BOXES****Box 1.** Main topics discussed**Part 1**

- Prevention of cardiovascular disease and dementia: attitude and experiences
- Good guidance of behaviour change
- Relationship with the patient

**Part 2**

- Attitude towards the internet-platform and online-support
- Role and responsibilities of the internet-coach
- Interaction with the patients online

**Box 2.** Key features of the HATICE internet-platform with coaching

- Patient-centred: the patient can login onto a personal portal to review and manage his/her personal cardiovascular risk profile
- Improving health knowledge: the patient can access educational modules about cardiovascular risk factors and lifestyle
- Goal setting and self-monitoring: the patient can set his/her own goals for behaviour change and monitor how he/she is doing by entering self-measurements or keeping a diary
- Coaching: the coach monitors the patient's self-management and they can communicate online through messages

**Box 3:** the Finnish and Dutch primary care systems

Both Finland and the Netherlands have strongly developed primary care systems with an important gatekeeper function:

*The Finnish primary care system*

In Finland, health promotion and disease prevention have been the focus of healthcare policy for decades. Primary care is delivered by public healthcare centres but also through occupational health facilities<sup>35-37</sup>. In many parts of Finland, healthcare centres cover large geographical areas that are sparsely populated and often have shortage of staff, contributing to long waiting lists and lack of personal continuity of care. All healthcare centres use electronic medical records to ensure continuity of care. Finland was the first European country to introduce a law (in 1993) defining the patient's right to access to all medical information and the right to autonomy (patient's informed consent for any medical treatment). Currently, a national patient data repository is under development to provide Finnish patients complete access to their own electronic medical record<sup>38</sup>. Nurses have an important role in primary healthcare. They work in close collaboration with the general practitioners and have their own consulting hours to assess patients. Regarding cardiovascular prevention, they monitor patients with diabetes, hypertension and dyslipidaemia, as described in national guidelines<sup>39-41</sup>. Finnish companies offer occupational health facilities to their employees, including both preventive and curative health services, which are delivered through semi-private healthcare centres that also work with nurses in a similar fashion as the public primary health care centres. Since waiting lists are long in public primary care, many employees direct themselves to these health services instead.

*The Dutch primary care system*

Key features of the Dutch healthcare system are access to care for everyone and solidarity through medical insurance<sup>42,43</sup>. General practices form the core of primary care and general practitioners (GPs) are gatekeepers of the healthcare system, providing acute, chronic and preventive care. Since the Netherlands are densely populated, people often live at short distance from their general practice. In most general practices continuity of care is ensured by allocating the patient to one GP. In the Netherlands, informed consent is also ensured by law, but in daily practice, consent is often assumed and only explicitly discussed in case treatment options can have far-reaching consequences<sup>43</sup>. Almost all GPs use electronic medical records. Patients have the right to inspect their medical records, but do not have complete access to them.

Nurses have an important position in primary care in the Netherlands. Since several decades, GPs have delegated tasks to practice nurses, especially concerning chronic disease management. Currently, these nurses provide a substantial part of cardiovascular risk management care, including diabetes care, which has been worked out in several regional and national guidelines and work descriptions<sup>9,44-46</sup>. Access to the GP is efficient, there are no waiting lists<sup>47</sup>.

## FIGURE LEGENDS

### **Figure 1.** Schematic visualization of the main themes and their connections

Legend: Left, the three main preconditions for good behaviour change guidance in cardiovascular preventive care that both Finnish and Dutch nurses identified, are depicted. Right of this, it is shown how the Finnish and Dutch nurses suggest to realise these preconditions in the online setting. Since there were differences between the nurses this is depicted separately for the Finnish and Dutch nurses. Below it is shown that local health practices influenced both the preconditions (and their operationalization (not shown in figure but explained in results section)) and the integration into online support.



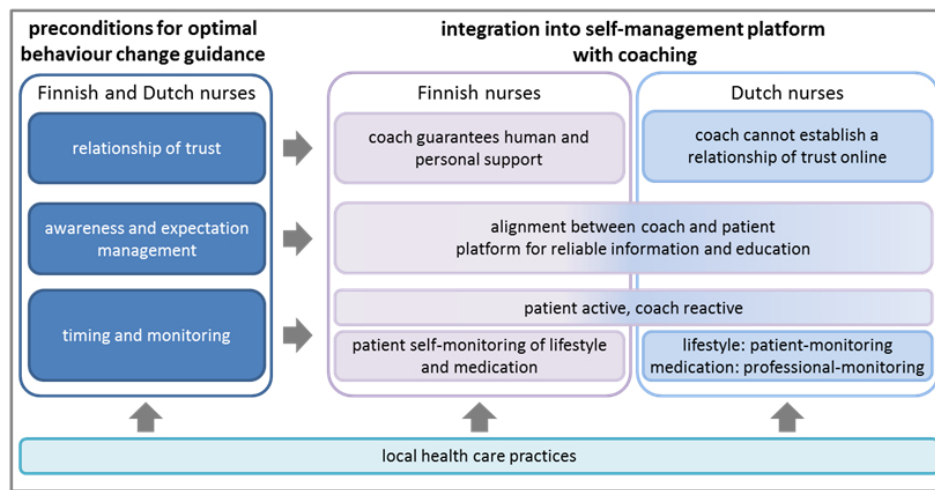

Caption : Caption: Figure 1. Schematic visualization of the main themes and their connections. Legend: Left, the three main preconditions for good behaviour change guidance in cardiovascular preventive care that both Finnish and Dutch nurses identified, are depicted. Right of this, it is shown how the Finnish and Dutch nurses suggest to realise these preconditions in the online setting. Since there were differences between the nurses this is depicted separately for the Finnish and Dutch nurses. Below it is shown that local health practices influenced both the preconditions (and their operationalization (not shown in figure but explained in results section)) and the integration into online support.

228x121mm (96 x 96 DPI)



**APPENDIX 1 to 'Integrating nurses' experiences with supporting behaviour change for cardiovascular prevention into a self-management internet-platform in Finland and the Netherlands: a qualitative study'**

**Appendix 1: COREQ checklist**

| No.                                     | Item                                                                    | Explanation                                                                                                                                                                                                                                                                                                                          | Reported on page no.       |
|-----------------------------------------|-------------------------------------------------------------------------|--------------------------------------------------------------------------------------------------------------------------------------------------------------------------------------------------------------------------------------------------------------------------------------------------------------------------------------|----------------------------|
| Domain 1: Research team and reflexivity |                                                                         |                                                                                                                                                                                                                                                                                                                                      |                            |
| 1                                       | Interviewers                                                            | NL: Pols AJ and Ligthart S<br>FI: Rosenberg A                                                                                                                                                                                                                                                                                        | Not reported in manuscript |
| 2                                       | Credentials of the researchers involved in data collection and analysis | NL: Beishuizen CRL: MD PhD-student; Rooskens F: BSc; Ligthart S: MD, PhD-student; Pols AJ: prof; Moll van Charante EP: MD PhD<br>FI: Akenine U: PhD-student; Barbera M: PhD; Rosenberg A: PhD-student                                                                                                                                | Not reported in manuscript |
| 3                                       | Occupation of the researchers involved in data collection and analysis  | NL: Beishuizen CRL: PhD-student; Rooskens F: medical student; Ligthart S: general practitioner in training, PhD-student; Pols AJ: professor in medical ethics; Moll van Charante EP: postdoc researcher, general practitioner<br>FI: Akenine U: PhD-student, research nurse; Barbera M: postdoc researcher; Rosenberg A: PhD-student | Not reported in manuscript |
| 4                                       | Gender                                                                  | All researchers are female, except for Moll van Charante EP, who is male                                                                                                                                                                                                                                                             | Not reported in manuscript |
| 5                                       | Experience and training                                                 | See main text                                                                                                                                                                                                                                                                                                                        | p5                         |
| 6                                       | Relationship established                                                | NL: there was an indirect relationship between research team and the participants, because the nurses had been involved in a previous research project of the research team in which 2 researchers (Ligthart S and Moll van Charante EP) were also involved<br>FI: no previous relationship established                              | Not reported in manuscript |
| 7                                       | Participant knowledge of the                                            | NL: participants knew the professional background of the moderators                                                                                                                                                                                                                                                                  | Not reported in            |

|                        |                                       |                                                                                                                                                                                                                                                                                     |                            |
|------------------------|---------------------------------------|-------------------------------------------------------------------------------------------------------------------------------------------------------------------------------------------------------------------------------------------------------------------------------------|----------------------------|
|                        | interviewer                           | FI: participants knew the professional background of the moderator                                                                                                                                                                                                                  | manuscript                 |
| 8                      | Interviewer characteristics           | NL: Pols AJ conducts qualitative research on the ethics of use of technology and eHealth in medical care. Ligthart S conducts quantitative and qualitative research on cardiovascular prevention in older people<br><br>FI: Rosenberg A conducts research on prevention of dementia | Not reported in manuscript |
| Domain 2: Study design |                                       |                                                                                                                                                                                                                                                                                     |                            |
| 9                      | Methodological information and theory | See main text                                                                                                                                                                                                                                                                       | p4 and p5                  |
| 10                     | Sampling                              | See main text                                                                                                                                                                                                                                                                       | p4                         |
| 11                     | Method of approach                    | See main text                                                                                                                                                                                                                                                                       | p4                         |
| 12                     | Sample size                           | See main text                                                                                                                                                                                                                                                                       | p4                         |
| 13                     | Non-participation                     | See main text                                                                                                                                                                                                                                                                       | p4                         |
| 14                     | Setting of data collection            | See main text                                                                                                                                                                                                                                                                       | p4                         |
| 15                     | Presence of non-participants          | NL: Eric Moll- van Charante and Pim Happel were present as non-participating audience<br><br>FI: no others were present                                                                                                                                                             | Not reported in manuscript |
| 16                     | Description of sample                 | See main text                                                                                                                                                                                                                                                                       | p4                         |
| 17                     | Interview guide                       | See main text                                                                                                                                                                                                                                                                       | p5                         |
| 18                     | Repeat interviews                     | Not performed                                                                                                                                                                                                                                                                       |                            |
| 19                     | Audio/visual recording                | See main text                                                                                                                                                                                                                                                                       | p5                         |
| 20                     | Field notes                           | See main text                                                                                                                                                                                                                                                                       | p5                         |
| 21                     | Duration                              | See main text                                                                                                                                                                                                                                                                       | p5                         |

|                                 |                                |                                                                                                                                                                                                                                                                                                                                                                                                             |                            |
|---------------------------------|--------------------------------|-------------------------------------------------------------------------------------------------------------------------------------------------------------------------------------------------------------------------------------------------------------------------------------------------------------------------------------------------------------------------------------------------------------|----------------------------|
| 22                              | Data saturation                | See main text                                                                                                                                                                                                                                                                                                                                                                                               | P1                         |
| 23                              | Transcripts returned           | Not performed                                                                                                                                                                                                                                                                                                                                                                                               |                            |
| Domain 3: analysis and findings |                                |                                                                                                                                                                                                                                                                                                                                                                                                             |                            |
| 24                              | Number of data coders          | NL: 2<br>FI: 2                                                                                                                                                                                                                                                                                                                                                                                              | p5                         |
| 25                              | Description of the coding tree | See main text (figure 1)                                                                                                                                                                                                                                                                                                                                                                                    | p11                        |
| 26                              | Derivation of themes           | See main text                                                                                                                                                                                                                                                                                                                                                                                               | p5                         |
| 27                              | Software                       | No special qualitative software was used                                                                                                                                                                                                                                                                                                                                                                    |                            |
| 28                              | Participant checking           | See main text                                                                                                                                                                                                                                                                                                                                                                                               | p6 and p13                 |
| 29                              | Quotations presented           | See main text                                                                                                                                                                                                                                                                                                                                                                                               | p6 – p11                   |
| 30                              | Data and findings consistent   | See main text                                                                                                                                                                                                                                                                                                                                                                                               | p6 – p11                   |
| 31                              | Clarity of major themes        | See main text and figure 1                                                                                                                                                                                                                                                                                                                                                                                  | p6-p12                     |
| 32                              | Clarity of minor themes        | <p>Within the groups, the Dutch and Finnish nurses shared opinions and experiences on most topics. Between the Dutch and Finnish groups, some interesting differences in opinions and experiences were identified. We choose therefore to focus on these differences when presenting our results, but not on diverse cases within the groups.</p> <p>Minor themes were not discussed due to word limits</p> | Not reported in manuscript |

**APPENDIX 2 to 'Integrating nurses' experiences with supporting behaviour change for cardiovascular prevention into a self-management internet-platform in Finland and the Netherlands: a qualitative study'**

**Appendix 2:** Topic list

| <b>FOCUS GROUP nurses part ONE cardiovascular prevention</b>                                                                                                                                                                                                                                                           |                                                                     |                                                                                                                                                                                                                                                    |
|------------------------------------------------------------------------------------------------------------------------------------------------------------------------------------------------------------------------------------------------------------------------------------------------------------------------|---------------------------------------------------------------------|----------------------------------------------------------------------------------------------------------------------------------------------------------------------------------------------------------------------------------------------------|
| <b>Overview part one</b>                                                                                                                                                                                                                                                                                               | <b>Topic (possible items)</b>                                       | <b>Possible questions</b>                                                                                                                                                                                                                          |
| <i>Aim of the meeting is to learn from the nurses' experiences in cardiovascular prevention: what are best practices to stimulate behaviour change, what is their attitude towards a prevention program for older people via the internet, how would they support people in lifestyle change through the internet?</i> |                                                                     |                                                                                                                                                                                                                                                    |
|                                                                                                                                                                                                                                                                                                                        | <b>CVD prevention</b>                                               |                                                                                                                                                                                                                                                    |
|                                                                                                                                                                                                                                                                                                                        | Activities on CVD prevention                                        | Do you currently conduct activities on CVD prevention?                                                                                                                                                                                             |
|                                                                                                                                                                                                                                                                                                                        | Experiences / lessons learned                                       | What are your experiences and lessons learned, especially regarding giving 'medical' guidance versus giving lifestyle guidance and regarding behavior change?                                                                                      |
|                                                                                                                                                                                                                                                                                                                        | <b>Dementia prevention</b>                                          | In the last decade, we got more and more indications from neurological research that risk factors for cardiovascular disease are also risk factors for dementia. So, possibly, reducing cardiovascular risk may also postpone or prevent dementia. |
|                                                                                                                                                                                                                                                                                                                        | Attitude towards dementia prevention                                | What is your attitude / your ideas regarding dementia prevention?                                                                                                                                                                                  |
|                                                                                                                                                                                                                                                                                                                        | Awareness of dementia risk and compliance to lifestyle change       | Most people are not yet aware of the association between CV risk and dementia, but do seem to be very afraid of dementia. Do you think that more awareness would enhance compliance/adherence to lifestyle change? What are your ideas on this?    |
|                                                                                                                                                                                                                                                                                                                        | <b>Relationship with participants and regular healthcare system</b> |                                                                                                                                                                                                                                                    |
|                                                                                                                                                                                                                                                                                                                        | Guiding lifestyle change                                            | Which factors could contribute to good guidance of lifestyle change?                                                                                                                                                                               |
|                                                                                                                                                                                                                                                                                                                        | Relationship with patient                                           | Which factors could contribute to a good relationship with your patient?                                                                                                                                                                           |
|                                                                                                                                                                                                                                                                                                                        | Relation with GP and regular practice assistant                     | How should the platform coach link with the patients' GP and regular practice assistant/nurse (the regular healthcare system)?                                                                                                                     |

|    |                                                                                                                           |                                                                        |
|----|---------------------------------------------------------------------------------------------------------------------------|------------------------------------------------------------------------|
| 1  |                                                                                                                           |                                                                        |
| 2  |                                                                                                                           |                                                                        |
| 3  | Attitude towards internet                                                                                                 | What is your attitude towards a prevention program via the internet    |
| 4  | intervention                                                                                                              | (with support from a coach)?                                           |
| 5  |                                                                                                                           |                                                                        |
| 6  |                                                                                                                           | How should the platform coach link with the patients' GP and regular   |
| 7  |                                                                                                                           | practice assistant/nurse (the regular healthcare system)?              |
| 8  |                                                                                                                           |                                                                        |
| 9  |                                                                                                                           |                                                                        |
| 10 | <b>FOCUS GROUP nurses part TWO The</b>                                                                                    |                                                                        |
| 11 | <b>platform</b>                                                                                                           |                                                                        |
| 12 |                                                                                                                           |                                                                        |
| 13 | <i>Assistant moderator explains about HATICE and platform by showing the powerpoint with screen shots of the platform</i> |                                                                        |
| 14 |                                                                                                                           |                                                                        |
| 15 |                                                                                                                           |                                                                        |
| 16 | <b>Information required for</b>                                                                                           |                                                                        |
| 17 | <b>support</b>                                                                                                            | Imagine yourself being a coach using the internet-platform:            |
| 18 |                                                                                                                           |                                                                        |
| 19 |                                                                                                                           | Which kind of information regarding the participants do you need to be |
| 20 |                                                                                                                           | able to support them?                                                  |
| 21 |                                                                                                                           |                                                                        |
| 22 |                                                                                                                           |                                                                        |
| 23 | <b>Role and responsibilities</b>                                                                                          |                                                                        |
| 24 |                                                                                                                           |                                                                        |
| 25 | Responsibility goal setting                                                                                               | Who is responsible for goal setting? (capability of patients)          |
| 26 |                                                                                                                           |                                                                        |
| 27 |                                                                                                                           | How do you see your role in creating lifestyle groups and how can      |
| 28 | Role in lifestyle groups                                                                                                  | participation be encouraged?                                           |
| 29 |                                                                                                                           |                                                                        |
| 30 | <b>Interaction with</b>                                                                                                   |                                                                        |
| 31 | <b>participants</b>                                                                                                       |                                                                        |
| 32 |                                                                                                                           |                                                                        |
| 33 |                                                                                                                           |                                                                        |
| 34 | Experience with                                                                                                           | Do you have experience with motivational interviewing, how could this  |
| 35 | motivational interviewing                                                                                                 | technique be used by the coach?                                        |
| 36 |                                                                                                                           |                                                                        |
| 37 | Frequency of contact                                                                                                      | How often would you like to have contact with your patient?            |
| 38 |                                                                                                                           |                                                                        |
| 39 |                                                                                                                           |                                                                        |
| 40 |                                                                                                                           | Which mode of communication do you prefer? (phone, skype +/-           |
| 41 | Mode of communication                                                                                                     | webcam, email, chat...)                                                |
| 42 |                                                                                                                           |                                                                        |
| 43 |                                                                                                                           | What should be the role of the participant network of support in       |
| 44 | Network of support                                                                                                        | lifestyle change and how can this network be engaged?                  |
| 45 |                                                                                                                           |                                                                        |
| 46 |                                                                                                                           | Do you like to receive automatic alerts/reminders when patients have   |
| 47 | Alerts / reminders                                                                                                        | alarming values or did not log-on?                                     |
| 48 |                                                                                                                           |                                                                        |
| 49 |                                                                                                                           |                                                                        |
| 50 | <i>Assistant moderator and moderator verify key messages from focus group</i>                                             |                                                                        |
| 51 |                                                                                                                           |                                                                        |
| 52 | <i>Moderator thanks nurses</i>                                                                                            |                                                                        |
| 53 |                                                                                                                           |                                                                        |
| 54 |                                                                                                                           |                                                                        |
| 55 |                                                                                                                           |                                                                        |
| 56 |                                                                                                                           |                                                                        |
| 57 |                                                                                                                           |                                                                        |
| 58 |                                                                                                                           |                                                                        |
| 59 |                                                                                                                           |                                                                        |
| 60 |                                                                                                                           |                                                                        |

# BMJ Open

## Integrating nurses' experiences with supporting behaviour change for cardiovascular prevention into a self-management internet-platform in Finland and the Netherlands: a qualitative study

|                                 |                                                                                                                                                                                                                                                                                                                                                                                                                                                                                                                                                                                                                                                                                                                                                                                                                                                                                                                                                                                                                                                                                                                                                                                                              |
|---------------------------------|--------------------------------------------------------------------------------------------------------------------------------------------------------------------------------------------------------------------------------------------------------------------------------------------------------------------------------------------------------------------------------------------------------------------------------------------------------------------------------------------------------------------------------------------------------------------------------------------------------------------------------------------------------------------------------------------------------------------------------------------------------------------------------------------------------------------------------------------------------------------------------------------------------------------------------------------------------------------------------------------------------------------------------------------------------------------------------------------------------------------------------------------------------------------------------------------------------------|
| Journal:                        | <i>BMJ Open</i>                                                                                                                                                                                                                                                                                                                                                                                                                                                                                                                                                                                                                                                                                                                                                                                                                                                                                                                                                                                                                                                                                                                                                                                              |
| Manuscript ID                   | bmjopen-2018-023480.R1                                                                                                                                                                                                                                                                                                                                                                                                                                                                                                                                                                                                                                                                                                                                                                                                                                                                                                                                                                                                                                                                                                                                                                                       |
| Article Type:                   | Research                                                                                                                                                                                                                                                                                                                                                                                                                                                                                                                                                                                                                                                                                                                                                                                                                                                                                                                                                                                                                                                                                                                                                                                                     |
| Date Submitted by the Author:   | 20-Dec-2018                                                                                                                                                                                                                                                                                                                                                                                                                                                                                                                                                                                                                                                                                                                                                                                                                                                                                                                                                                                                                                                                                                                                                                                                  |
| Complete List of Authors:       | Beishuizen, Cathrien; Academic Medical Center, General Practice Akenine, Ulrika; Karolinska Institutet and Karolinska University Hospital, Division of Clinical Geriatrics , Department of Neurobiology, Care Sciences and Society<br>Barbera, Mariagnese; University of Eastern Finland, Clinical Medicine/Neurology<br>Rosenberg, Anna; University of Eastern Finland, Clinical Medicine/Neurology<br>Fallah Pour, Mandana; Karolinska Institutet, Division of Occupational Therapy, Department of Neurobiology, Care Sciences and Society<br>Richard, Edo; Academic Medical Centre, University of Amsterdam, Neurology; Radboud University Medical Center, Department of Neurology, Donders Institute for Brain, Cognition and Behaviour<br>Soininen, Hilikka; University of Eastern Finland, Clinical Medicine/Neurology<br>Mangialasche, Francesca; Karolinska Institutet, Division of Geriatric Epidemiology<br>Kivipelto, Miia; Karolinska Institutet, Division of Geriatric Epidemiology; University of Eastern Finland, Clinical Medicine/Neurology<br>Pols, A.; AMC, Department of General Practice, Section of Medical Ethics, Moll van Charante, Eric; Academic Medical Center, General Practice |
| <b>Primary Subject Heading</b>: | Cardiovascular medicine                                                                                                                                                                                                                                                                                                                                                                                                                                                                                                                                                                                                                                                                                                                                                                                                                                                                                                                                                                                                                                                                                                                                                                                      |
| Secondary Subject Heading:      | General practice / Family practice, Health services research, Nursing, Patient-centred medicine, Qualitative research                                                                                                                                                                                                                                                                                                                                                                                                                                                                                                                                                                                                                                                                                                                                                                                                                                                                                                                                                                                                                                                                                        |
| Keywords:                       | QUALITATIVE RESEARCH, PRIMARY CARE, Nurse-led care, eHealth, Cardiovascular prevention, Dementia prevention                                                                                                                                                                                                                                                                                                                                                                                                                                                                                                                                                                                                                                                                                                                                                                                                                                                                                                                                                                                                                                                                                                  |
|                                 |                                                                                                                                                                                                                                                                                                                                                                                                                                                                                                                                                                                                                                                                                                                                                                                                                                                                                                                                                                                                                                                                                                                                                                                                              |

SCHOLARONE™  
Manuscripts

1  
2  
3  
4  
5  
6  
7  
8  
9  
10  
11  
12  
13  
14  
15  
16  
17  
18  
19  
20  
21  
22  
23  
24  
25  
26  
27  
28  
29  
30  
31  
32  
33  
34  
35  
36  
37  
38  
39  
40  
41  
42  
43  
44  
45  
46  
47  
48  
49  
50  
51  
52  
53  
54  
55  
56  
57  
58  
59  
60

1  
2  
3 1 **Integrating nurses' experiences with supporting behaviour change for**  
4 **cardiovascular prevention into a self-management internet-platform in**  
5 **Finland and the Netherlands: a qualitative study**  
6  
7  
8  
9  
10

11 5 *Authors*

12 6 Beishuizen CRL<sup>1\*</sup>, Akenine U<sup>2</sup>, Barbera M<sup>3</sup>, Rosenberg A<sup>3</sup>, Fallahpour M<sup>4</sup>, Richard E<sup>5,6</sup>, Soininen H<sup>3</sup>,  
13 7 <sup>7</sup>, Mangialasche F<sup>8</sup>, Kivipelto M<sup>2, 3,9</sup>, Pols AJ<sup>10</sup> and Moll van Charante EP<sup>1</sup>

14 8  
15 9 \*corresponding author

16 10 address: Department of General Practice  
17 11 Amsterdam UMC/University of Amsterdam  
18 12 Meibergdreef 9, 1100 DD  
19 13 Amsterdam, Netherlands

20 14 email: [c.r.beishuizen@amc.uva.nl](mailto:c.r.beishuizen@amc.uva.nl)

21 15 phone: +31 6 16359453  
22 16

23 17 *Affiliations*

24 18 <sup>1</sup> Department of General Practice, Amsterdam UMC/University of Amsterdam, Amsterdam, The Netherlands

25 19 <sup>2</sup> Division of Clinical Geriatrics, Department of Neurobiology, Care Sciences and Society, Karolinska Institutet,  
26 20 and Karolinska University Hospital, Stockholm, Sweden

27 21 <sup>3</sup> Institute of Clinical Medicine/Neurology, University of Eastern Finland, Kuopio, Finland

28 22 <sup>4</sup> Department of Neurobiology Care Sciences and Society, Division of Occupational Therapy, Karolinska  
29 23 Institutet, Huddinge, Sweden

30 24 <sup>5</sup> Department of Neurology, Amsterdam UMC/University of Amsterdam, Amsterdam, The Netherlands

31 25 <sup>6</sup> Department of Neurology, Donders Institute for Brain, Cognition and Behaviour, Radboud University Medical  
32 26 Center, Nijmegen, The Netherlands

33 27 <sup>7</sup> Neurocenter, Neurology, Kuopio University Hospital, Kuopio, Finland.

34 28 <sup>8</sup> Aging Research Center, Karolinska Institutet and Stockholm University, Stockholm, Sweden

35 29 <sup>9</sup> Chronic Disease Prevention Unit, National Institute for Health and Welfare, Helsinki,, Finland

36 30 <sup>10</sup> Section of Medical Ethics, Department of General Practice, Amsterdam UMC/University of Amsterdam,  
37 31 Amsterdam, The Netherlands  
38 32

39 33 **Word count**

40 34 Abstract: 258

41 35 Total text (main text and quotations): 4,838

42 36 Main text only: 3,738

43 37 Quotations only: 1,100  
44 38  
45  
46  
47  
48  
49  
50  
51  
52  
53  
54  
55  
56  
57  
58  
59  
60



## Abstract

**Objectives:** Global ageing is linked to an increased burden of cardiovascular disease (CVD) and dementia, which calls for better prevention strategies. Self-management and eHealth applications are regarded as promising strategies to support prevention. The aim of this study was to explore nurses' best practices with behaviour change guidance for cardiovascular (CV) prevention in order to learn how to optimally integrate these into a coach-supported internet-platform for CV self-management.

**Design:** Qualitative focus group study in Finland and the Netherlands. Discussions were audiotaped and transcribed. Data were thematically analysed following grounded theory.

**Setting:** Dutch and Finnish primary care settings.

**Participants:** Six Finnish and seven Dutch primary care nurses experienced in CV prevention

**Results:** Similar best practices were found and comprised of: (1) establishing a relationship of trust, (2) managing awareness and expectations and (3) appropriate timing and monitoring of the process of behaviour change. However, the Finnish and Dutch nurses used different approaches for accomplishment of these practices, which was reflected in their recommendations for online-support. Both groups emphasised that online-support should be combined with human-support and integrated in regular care. Finnish nurses had more confidence in patient self-management and remote communication than Dutch nurses, who emphasised the importance of face-to-face contact and preferred to keep the control on medical aspects of prevention.

**Conclusions:** Differences in CV prevention support of Dutch and Finnish nurses appear to reflect their local healthcare practices, which should be taken into account when designing internet-platforms for health self-management. Including cognitive health as a goal of CV prevention might stimulate people's motivation for health behaviour change.

**Keywords:** cardiovascular prevention, dementia prevention, behaviour change, eHealth, primary care, nurse-led care, qualitative research

### Strengths and limitations of this study

- This international focus group study directly compares best practices of Finnish and Dutch primary care nurses in cardiovascular prevention
- Language barriers were overcome by closely aligning our research methodologies, multiple iterations in the analysis and extensive meetings between the research teams
- Our original approach, following grounded theory, enabled us to learn from the best practices of nurse experts in 'traditional' face-to-face cardiovascular preventive care and integrate these into optimal health behaviour change support through novel eHealth applications

- 1  
2  
3 1 • Since our samples and number of focus groups were limited, we are aware that our findings  
4 2 are not exhaustive, especially since we identified local health care practices substantially  
5 3 impacted the study results  
6 4 • Due to the exploratory character of our study, our findings are preliminary and might be  
7 5 influenced by differences in clinical experience of the nurses and differences in age of their  
8 6 patient populations  
9 7  
10 8  
11  
12  
13  
14  
15  
16  
17  
18  
19  
20  
21  
22  
23  
24  
25  
26  
27  
28  
29  
30  
31  
32  
33  
34  
35  
36  
37  
38  
39  
40  
41  
42  
43  
44  
45  
46  
47  
48  
49  
50  
51  
52  
53  
54  
55  
56  
57  
58  
59  
60
- Since our samples and number of focus groups were limited, we are aware that our findings are not exhaustive, especially since we identified local health care practices substantially impacted the study results
  - Due to the exploratory character of our study, our findings are preliminary and might be influenced by differences in clinical experience of the nurses and differences in age of their patient populations

For peer review only

# 1 Manuscript

## 2 INTRODUCTION

3 Global ageing places an increasing demand on healthcare systems, partially due to the absolute rise in  
4 cardiovascular disease (CVD) and dementia cases<sup>1 2</sup>. As these disorders share a number of risk  
5 factors, effective cardiovascular (CV) prevention could also lead to the prevention of dementia<sup>3-6</sup>. CV  
6 prevention requires health behaviour change, the process of “initiating and maintaining behaviours  
7 that reduce health risks and control existent chronic disease”<sup>7</sup>. In CV prevention, core behaviours  
8 consist of a healthy lifestyle (healthy diet, sufficient physical activity and non-smoking) and adherence  
9 to medication. Although the processes behind supporting health behaviour change have been  
10 theorised extensively<sup>8-12</sup>, putting them into practice remains a challenge<sup>13 14</sup> and novel, more effective,  
11 approaches are needed<sup>15</sup>. Two strategies of current interest are self-management and eHealth. In self-  
12 management, the individual, instead of the healthcare professional, takes the lead in the management  
13 of his/her risk factors and adherence, and therefore in behaviour change<sup>16 17</sup>. eHealth applications are  
14 attractive because of their wide reach and have the potential to support self-management because of  
15 their suitability for health education, interactivity and monitoring<sup>18 19</sup>. Although researchers and  
16 policymakers have high expectations of eHealth and self-management, the more intensive face-to-face  
17 interventions still achieve better results than eHealth applications<sup>20</sup>. To learn how self-management  
18 and behaviour change are best stimulated and maintained online, we consulted ‘experts in the field’:  
19 nurses experienced in health behaviour change in the context of CV prevention.

20  
21 This project is part of the Healthy Ageing Through Internet Counselling in the Elderly (HATICE)  
22 study, which includes a European randomised controlled trial testing a coach-supported internet-  
23 platform for self-management of cardiovascular risk factors in older people to prevent CVD and  
24 cognitive decline<sup>21</sup>. In an international focus group study, we aimed to explore (1) nurses’ best  
25 practices with behaviour change guidance for cardiovascular prevention, including the potential for  
26 dementia prevention, and (2) learn how to integrate their practices into a coach-supported internet-  
27 platform (the online-support setting). This study took place in Finland and the Netherlands, two of the  
28 three countries that participated in the HATICE-study. Since the HATICE project aims to develop an  
29 internet-platform that is implementable across all European healthcare systems, we also explored the  
30 influence of local healthcare practices.

31

## 1 METHODS

### 2 Design

3 We performed an international qualitative focus group study following grounded theory<sup>22 23</sup>. The  
4 COREQ-checklist is included for complete information on methodology (**Appendix 1**)<sup>24</sup>.

### 5 Participants and setting

6 For sampling, we followed the grounded theory methodology of studying a health care practice by  
7 consulting field experts<sup>25</sup>. In this light, Finnish and Dutch primary care nurses experienced in CV  
8 preventive care were most eligible for this study and selective purposive samples were obtained. In  
9 Finland, occupational healthcare nurses were recruited because of their important role in preventive  
10 CV care (please see **Box 1** for a description of Finnish and Dutch primary health care systems and the  
11 position of Finnish occupational health). Fourteen nurses working in a semi-private healthcare centre  
12 in Kuopio (Eastern Finland) were invited by email and telephone and six female nurses (43%)  
13 consented to participate. Being occupational health nurses they cared mostly for patients in the  
14 working age. Clinical experience with CV prevention ranged from 2 to 35 years. In the Netherlands,  
15 we recruited primary care nurses experienced in cardiovascular risk management. A group of 32  
16 nurses experienced in CV preventive care working in general practices in two urban areas in the centre  
17 of the Netherlands was invited by email and telephone. Seven female nurses (22%) consented to  
18 participate. The unanimous reason for non-participation by Finnish and Dutch nurses was lack of time.  
19 The Dutch participating nurses cared for patients of all ages. Clinical experience with CV prevention  
20 ranged from 3 to 11 years. **Table 1** contains further characteristics.

### 22 **Box 1.** The Finnish and Dutch primary care systems

24 **Table 1.** Characteristics of the participating Finnish and Dutch nurses

| N<br>r | Coun<br>try* | Age | Education                                  | Type of CVD<br>prevention | Internet use at work                            |
|--------|--------------|-----|--------------------------------------------|---------------------------|-------------------------------------------------|
| 1      | FI           | 55  | occupational health nurse                  | prim/sec prev             | email, guideline use, referral, patient contact |
| 2      | FI           | 42  | occupational health nurse                  | prim/sec prev             | email, guideline use, referral                  |
| 3      | FI           | 25  | occupational health nurse                  | prim/sec prev             | email, guideline use, referral, patient contact |
| 4      | FI           | 45  | occupational health nurse                  | prim/sec prev             | email, guideline use, referral, patient contact |
| 5      | FI           | 49  | occupational health nurse                  | prim/sec prev             | email, guideline use, referral, patient contact |
| 6      | FI           | 60  | occupational health nurse                  | prim/sec prev             | guideline use, patient contact                  |
| 1      | NL           | 43  | general nurse, practice nurse <sup>a</sup> | prim/sec prev             | email, guideline use, referral, patient contact |

|   |    |    |                                            |               |                                                 |
|---|----|----|--------------------------------------------|---------------|-------------------------------------------------|
| 2 | NL | 49 | practice nurse                             | prim/sec prev | email, guideline use, referral, patient contact |
| 3 | NL | 51 | practice nurse                             | prim prev     | email, guideline use, referral, patient contact |
| 4 | NL | 53 | general nurse, practice nurse              | prim/sec prev | email, guideline use, referral                  |
| 5 | NL | 42 | practice nurse                             | sec prev      | email, guideline use, referral, patient contact |
| 6 | NL | 45 | general nurse, practice nurse <sup>b</sup> | prim/sec prev | email, guideline use, referral, patient contact |
| 7 | NL | 65 | general nurse, practice nurse              | prim/sec prev | email, guideline use, referral, patient contact |

\*abbreviations: CVD = cardiovascular disease, FI = Finland, prim = primary, sec = secondary, prev = prevention, NL = the Netherlands, DM = diabetes mellitus, COPD = chronic obstructive pulmonary disease

<sup>a</sup> practice nurse: received specific nursing training to work in the general practice

<sup>b</sup> general nurse: received general nursing training to work as a general nurse in the hospital

The study was presented to the medical ethics committee of the Academic Medical Centre in the Netherlands and a waiver was provided. In Finland, application for ethical approval nor a waiver were required. All participants provided written informed consent.

### Data collection

We conducted one focus group in the Netherlands (autumn 2013) and one in Finland (December 2015). We regarded focus groups the most appropriate method to answer our research aims, because it enabled us to explore the experiences and attitudes of the nurses most completely, as the nurses could directly respond to each other's opinions and develop their ideas through the discussion. In each country, an experienced focus group moderator chaired the sessions, while an assistant-moderator noted non-verbal communication and summarised the discussions. The discussion was conducted using a topic list as a flexible guide (**Box 2** and **Appendix 2**). After the Dutch session, the topic list was refined for the Finnish focus group, to further explore the following topics: the nurse-patient relationship, attitude towards eHealth applications, shaping optimal online support, the role of the nurse in this versus the role of the patient and dementia prevention. The moderators asked open-ended questions, following grounded theory to inductively approach the data. Both moderators first asked the nurses about their activities in cardiovascular prevention and how they supported their patients in the process of behaviour change. The Finnish moderator also asked the nurses about their experiences on prevention of dementia. In the second part, the HATICE internet-platform was presented (**Box 3**, a full description of the platform is reported elsewhere<sup>26</sup>) and the nurses were asked how they would optimally support their patients in an online setting. Both sessions lasted approximately two hours. The discussions were audio-recorded and transcribed.

### Box 2. Main topics discussed

1  
2  
3 1  
4  
5 2 **Box 3.** Key features of the HATICE internet-platform with coaching  
6  
7 3

8 4 **Coding and analysis**

9 5 In each country, two researchers coded and thematically analysed the transcripts following grounded  
10 6 theory<sup>22 23</sup>. Themes were derived inductively from the data and were not hypothesised beforehand.  
11 7 Open coding and identification of initial themes was first performed by the two researchers  
12 8 independently. Thereafter, codes and themes were compared. Dissimilarities were discussed until  
13 9 consensus was reached. Initial theme structure was then discussed with the senior researchers  
14 10 involved. In Finland, since the researchers were not Finnish native speakers, the transcript was  
15 11 translated into English and cross-checked by the Finnish focus group moderator, who was a Finnish  
16 12 native fluent English speaker. In this way, the complete analysis of the Finnish data could be  
17 13 performed in English. After the initial analysis performed locally, themes and corresponding  
18 14 quotations of the Dutch sessions were also translated into English. The two research teams then had  
19 15 two meetings to discuss the structure of main themes and categories. The analysis-phase<sup>22 23</sup> was an  
20 16 iterative process, during which the researchers of both teams repeatedly returned to their data-files to  
21 17 add, merge and refine themes, until a definite theme structure was agreed on by all authors. During the  
22 18 iterative analysis-phase, the researchers discussed the themes and alternatives and it was proposed that  
23 19 the local health care context was of influence on the differences found between caring styles of the two  
24 20 groups of nurses. Therefore, the research teams introduced their local health care systems (**Box 3**) to  
25 21 each other and these insights were used in further interpretation of the findings. A summary of the  
26 22 final conclusions was returned to the participants for feedback.  
27  
28  
29  
30  
31  
32  
33  
34  
35  
36  
37  
38  
39  
40  
41  
42  
43  
44  
45  
46  
47  
48  
49  
50

51 24 **Patient and public involvement**

52 25 Patients were not involved in the design of this substudy of HATICE. However, patients were  
53 26 involved in the development of the HATICE eHealth application by means of conduction focus groups  
54 27 with the projected target population of the HATICE eHealth application and by means of consulting  
55 28 patient organisations (Dutch Heart Foundation and Dutch and Finnish Alzheimer Association)<sup>26</sup>.  
56 29 Results of this substudy were disseminated to the participants by means of a written summary.  
57 30  
58 31

59 32 **RESULTS**

60 33 We present our findings in two sections: 1) Nurses experiences and practices with supporting the  
61 34 process of behaviour change for cardiovascular prevention, including the potential for dementia  
62 35 prevention, and 2) Their suggestions on how to integrate their experiences in an online-support setting.

63 36 **Part 1: Nurses' experiences and practices with supporting the process of behaviour change for**  
64 37 **cardiovascular prevention**

## Preconditions for behaviour change guidance

We identified three main themes, that both the Finnish and Dutch nurses regarded as preconditions for behaviour change guidance in their patients: establishing a relationship of trust, awareness and expectation management and appropriate timing and monitoring. Both groups of nurses explained what skills they used to realise these preconditions, showing subtle differences between the groups.

### *Establishing a relationship of trust*

According to both the Finnish and Dutch nurses, the basis of behaviour change support lay in establishing a relationship of trust with the patient: developing over time a good nurse-patient relationship in which the individual felt at ease and respected and comfortable enough to open up about lifestyle and behaviour issues:

*“For lifestyle change, for prevention, a relationship based on mutual trust is pivotal. It is good to have a many years' standing contact with people. Then you know what is going on in someone's life and in that, some kind of trust will grow that people really start believing what you are saying to them. And then, over time, people will start practising healthy behaviours that maybe they had no intention to follow, in the beginning” (Dutch nurse 1)*

Skills the nurses used to stimulate trust to grow, were personalising and tailoring their support to each patient, which included:

*“And you need to get a good picture of the situation, so that you don't give the same information to everyone. That's of no use. You need to think what the central issues are for this patient. What are the things he or she seems to have resources for? What are the goals that the client sets? What is the client able to do, and with what kind of intensity? What will the time span be like? And I also ask my client directly that what kind of support does he or she wishes? I'm trying to offer what the client thinks he or she needs” (Finnish nurse 1)*

Interestingly, when further exploring these skills, the nurses expressed different preferences regarding the ideal mode of communication. The Dutch nurses emphasized the importance of face-to-face contact and in-person continuity to establish a good relationship. For Finnish nurses an initial face-to-face contact only seemed sufficient to establish a working relation:

*“And here [refers to the HATICE platform] the initial contact and information session at the beginning is very important because I guess a sort of a relationship needs to be established here as well. In the same way. There are still people behind this platform.” (Finnish nurse 1)*



1  
2  
3 1 Thereafter, they were comfortable with further phone or email contact and did not regard this as less  
4 2 personal than face-to-face contact. Email contact also had advantages:  
5 3  
6  
7

8  
9  
10  
11  
12  
13  
14  
15  
16  
17  
18  
19  
20  
21  
22  
23  
24  
25  
26  
27  
28  
29  
30  
31  
32  
33  
34  
35  
36  
37  
38  
39  
40  
41  
42  
43  
44  
45  
46  
47  
48  
49  
50  
51  
52  
53  
54  
55  
56  
57  
58  
59  
60

“But sometimes this kind of communication online could be less complicated...than face to face.” (Finnish nurse 5)

“I have noticed in my work that some people prefer contacting me by e-mail and not by phone. [others agree] On the phone they might think that they are disturbing or it’s a bad timing, but one can write an e-mail or something anytime.” (Finnish nurse 3)

#### Awareness and expectation management

A second precondition was awareness and expectation management: checking the patients’ level of knowledge and expectations regarding prevention and personal cardiovascular risk. Nurses thought that most patients had considerable knowledge of cardiovascular disease prevention, especially in Finland, due to a long standing tradition in community based cardiovascular prevention (the North-Karelia project <sup>27</sup>). Nonetheless, both groups of nurses had the experience that people were not especially aware of their personal cardiovascular risk status:

“That’s it, isn’t it, for many people their health is not a concern yet. You can list them the facts, and they hear and read it everywhere, that it is unhealthy to have overweight and that they need to exercise more, but right now, they are not yet bothered by it.” (Dutch nurse 6)

Because of this lack of a sense of urgency, the nurses regarded the ability to educate their patients about consequences of health behaviours an essential skill of their profession. Once awareness and motivation had grown, people often had unrealistic expectations and the nurses needed to act as “myth busters” (Finnish nurse 4):

“And when we are, however, not able to offer the magic pills or wonder tricks, the clients may sometimes be disappointed when all I can suggest is these boring methods: diet and physical activity. And we cannot offer them a magic solution.” (Finnish nurse 4)

Often, once people were motivated to change their health behaviours, they also tended to set unrealistic goals, which the nurses then needed to bring back to realistic proportions:

“Start small. Do not make it too big. If you are obese, many people do not like it to go to the gym, they think the gym is only for lovely slim figures. You cannot convince them that that’s not true. Therefore it is important: try things first yourself. What can you do with small steps at home by yourself, before going outside. You have to start liking exercise.” (Dutch nurse 3)



1  
2  
3 1 Lastly, the nurses actively prepared their patients for failures during the process of behaviour change,  
4 as these were seen as inevitable:  
5  
6  
7

8  
9  
10  
11 4 *“I usually tell the patients that they’re allowed to fail; but even so, they are invited to, and they should come to the appointments. So then we can check the situation again, and set a new goal if needed.” (Finnish nurse 1)*

12 5  
13  
14 6 With the Finnish nurses, coaching on cardiovascular risk was also related to the potential for dementia  
15 7 prevention. They suggested that many patients feared dementia and lacked knowledge about the  
16 8 disease and treatment and prevention options, creating a stigma towards this condition. The nurses  
17 9 were aware of the link between cardiovascular disease and dementia, but felt they lacked sufficient  
18 10 knowledge and training to provide proper support:  
19  
20  
21  
22 11

23  
24  
25  
26 12 *“Well, we have not had the knowledge of reasons for dementia for that long. And these connections haven’t been...the research is recent: well, at least more recent than the research about heart diseases.” (Finnish nurse 5)*

27 13  
28  
29 14 They found that educating patients on the link between cardiovascular disease and dementia, would be  
30 15 a good starting point to raise awareness. Potentially, this could enhance motivation for CV prevention:  
31  
32  
33 16

34  
35  
36  
37 17 *“What is good for the heart - and we know what’s good for the heart – is also good for the brain but not everyone knows this. I think this link would be good to be aware of: you protect your heart but also the most important part of your body which is the brain.” (Finnish nurse 4)*

### 38 18 39 19 *Appropriate timing and monitoring*

40 20 The third precondition mentioned by the nurses was appropriate timing and monitoring: providing  
41 21 professional support at appropriate times and monitoring the progress of the patient towards behaviour  
42 22 change. Regular follow-up appointments stimulated adherence and motivation:  
43  
44  
45  
46  
47 23

48  
49  
50  
51 24 *“After three months, your plan fades away, your goal, your motivation.” (Dutch nurse 3).*

51 25 *“..that there is a possibility for follow-up. Usually it motivates people when someone looks after you: how are you progressing, no matter if the target is, for example, smoking cessation or increasing of physical activity.” (Finnish nurse 5)*

52  
53  
54  
55  
56 26 Monitoring ensured that the nurses could support their patients when experiencing obstacles or  
57 27 failures, although this could be difficult:  
58  
59  
60 28

1  
2  
3  
4  
5  
6  
7  
8  
9  
10  
11  
12  
13  
14  
15  
16  
17  
18  
19  
20  
21  
22  
23  
24  
25  
26  
27  
28  
29  
30  
31  
32  
33  
34  
35  
36  
37  
38  
39  
40  
41  
42  
43  
44  
45  
46  
47  
48  
49  
50  
51  
52  
53  
54  
55  
56  
57  
58  
59  
60

1  
2  
3  
4  
5  
6  
7  
8  
9

“Disappointments also play a role. For example: a guy with diabetes, he quit smoking but then his sugar levels went up and he needed to start with insulin. How do you explain that [to him]? Well, I challenge you to keep his attitude up and to maintain his motivation.” (Dutch nurse 5)

When discussing monitoring lifestyle behaviours both nurse groups attributed themselves a supportive role putting the patient in charge, because lifestyle was seen as the personal domain of the patient. However, regarding the medical components of preventive care (control of hypertension, diabetes and hypercholesterolemia), the Dutch nurses attributed a more directive role to themselves and the medical practice to avoid mistakes and complications. In contrast, the Finnish nurses regarded their patients as capable of staying in charge and described themselves as mentors:

10  
11  
12  
13  
14  
15  
16  
17  
18  
19  
20  
21  
22  
23  
24  
25  
26  
27  
28  
29  
30  
31  
32  
33  
34  
35  
36  
37  
38  
39  
40  
41  
42  
43  
44  
45  
46  
47  
48  
49  
50  
51  
52  
53  
54  
55  
56  
57  
58  
59  
60

10  
11  
12  
13  
14  
15  
16  
17  
18  
19  
20  
21  
22  
23  
24  
25  
26  
27  
28  
29  
30  
31  
32  
33  
34  
35  
36  
37  
38  
39  
40  
41  
42  
43  
44  
45  
46  
47  
48  
49  
50  
51  
52  
53  
54  
55  
56  
57  
58  
59  
60

“It is also one of the nurse’s responsibilities to be a contact person, support and a sort of mentor and also to refer the patient to a doctor if the nurse notices that something is going wrong.” (Finnish nurse 4)

## Part 2: Integrating the nurses’ strategies into an online-support setting

After having identified the preconditions for optimal behaviour change support and the skills nurses use in their current practices, we demonstrated the latest version of the HATICE internet-platform<sup>26</sup> and discussed how optimal online-support for CV prevention should be shaped and how they imagined providing online support. Both groups of nurses emphasised the importance of the aforementioned preconditions for optimal online support:

### *Establishing a relationship of trust*

All nurses regarded the presence of a coach as essential to guarantee personal support. The Finnish nurses felt that online coaching could successfully establish a relationship of trust, provided that the coach was a real person:

24  
25  
26  
27  
28  
29  
30  
31  
32  
33  
34  
35  
36  
37  
38  
39  
40  
41  
42  
43  
44  
45  
46  
47  
48  
49  
50  
51  
52  
53  
54  
55  
56  
57  
58  
59  
60

24  
25  
26  
27  
28  
29  
30  
31  
32  
33  
34  
35  
36  
37  
38  
39  
40  
41  
42  
43  
44  
45  
46  
47  
48  
49  
50  
51  
52  
53  
54  
55  
56  
57  
58  
59  
60

“Because of this social interaction on this website [the HATICE platform], the participant has a familiar and friendly person [as a coach] and not just some distant virtual coach who is a stranger. [...] it’s good that this combines the real-life person with the online contact, maybe it feels more comfortable and familiar [for the participant].” (Finnish nurse 4)

An initial face-to-face consultation with the patient could strengthen the establishment of a good relationship. Overall, for the Finnish nurses, online support was an obvious step forward in innovating healthcare:



1  
2  
3  
4  
5  
6  
7  
8  
9  
10  
11  
12  
13  
14  
15  
16  
17  
18  
19  
20  
21  
22  
23  
24  
25  
26  
27  
28  
29  
30  
31  
32  
33  
34  
35  
36  
37  
38  
39  
40  
41  
42  
43  
44  
45  
46  
47  
48  
49  
50  
51  
52  
53  
54  
55  
56  
57  
58  
59  
60

1  
2  
3  
4  
5  
6  
7  
8  
9  
10  
11  
12  
13  
14  
15  
16  
17  
18  
19  
20  
21  
22  
23  
24  
25  
26  
27  
28  
29  
30  
31  
32  
33  
34  
35  
36  
37  
38  
39  
40  
41  
42  
43  
44  
45  
46  
47  
48  
49  
50  
51  
52  
53  
54  
55  
56  
57  
58  
59  
60

“I think 2 or 3 types of platform users will arise: people who really get the concept of self-management (and start coaching themselves), people who need the coach (and give the coach access to their complete profile) and a group in between, alerting the coach if a goal has not been met.” (Dutch nurse 2)

1  
2  
3  
4  
5  
6  
7  
8  
9  
10  
11  
12  
13  
14  
15  
16  
17  
18  
19  
20  
21  
22  
23  
24  
25  
26  
27  
28  
29  
30  
31  
32  
33  
34  
35  
36  
37  
38  
39  
40  
41  
42  
43  
44  
45  
46  
47  
48  
49  
50  
51  
52  
53  
54  
55  
56  
57  
58  
59  
60

1  
2  
3  
4  
5  
6  
7  
8  
9  
10  
11  
12  
13  
14  
15  
16  
17  
18  
19  
20  
21  
22  
23  
24  
25  
26  
27  
28  
29  
30  
31  
32  
33  
34  
35  
36  
37  
38  
39  
40  
41  
42  
43  
44  
45  
46  
47  
48  
49  
50  
51  
52  
53  
54  
55  
56  
57  
58  
59  
60

While discussing this topic, they expressed ambivalence whether it was ‘safe’ to entrust their patients with self-management when it related to medical issues:

1  
2  
3  
4  
5  
6  
7  
8  
9  
10  
11  
12  
13  
14  
15  
16  
17  
18  
19  
20  
21  
22  
23  
24  
25  
26  
27  
28  
29  
30  
31  
32  
33  
34  
35  
36  
37  
38  
39  
40  
41  
42  
43  
44  
45  
46  
47  
48  
49  
50  
51  
52  
53  
54  
55  
56  
57  
58  
59  
60

1  
2  
3  
4  
5  
6  
7  
8  
9  
10  
11  
12  
13  
14  
15  
16  
17  
18  
19  
20  
21  
22  
23  
24  
25  
26  
27  
28  
29  
30  
31  
32  
33  
34  
35  
36  
37  
38  
39  
40  
41  
42  
43  
44  
45  
46  
47  
48  
49  
50  
51  
52  
53  
54  
55  
56  
57  
58  
59  
60

“I tend to think: if it is self-management, you shouldn't want to get yourself involved in that [medication use], you should leave that with the GP. On the other hand, if someone's blood pressure is constantly rising, then you do want to know which medication someone is taking, to get the complete picture. Because then you check whether there might be a problem in medication-use.” (Dutch nurse 3)

1  
2  
3  
4  
5  
6  
7  
8  
9  
10  
11  
12  
13  
14  
15  
16  
17  
18  
19  
20  
21  
22  
23  
24  
25  
26  
27  
28  
29  
30  
31  
32  
33  
34  
35  
36  
37  
38  
39  
40  
41  
42  
43  
44  
45  
46  
47  
48  
49  
50  
51  
52  
53  
54  
55  
56  
57  
58  
59  
60

1  
2  
3  
4  
5  
6  
7  
8  
9  
10  
11  
12  
13  
14  
15  
16  
17  
18  
19  
20  
21  
22  
23  
24  
25  
26  
27  
28  
29  
30  
31  
32  
33  
34  
35  
36  
37  
38  
39  
40  
41  
42  
43  
44  
45  
46  
47  
48  
49  
50  
51  
52  
53  
54  
55  
56  
57  
58  
59  
60

At the end of this discussion, for safety reasons, they concluded they preferred a platform focusing on lifestyle only, staying in control of medical issues within the GP practice.

## 1 DISCUSSION

### 3 Principal findings and interpretation

4 In this international focus group study, we identified three main themes that both the Finnish and  
5 Dutch nurses emphasised as most important preconditions for behaviour change support in  
6 cardiovascular prevention, and potentially, prevention of cognitive decline: (1) establishing a  
7 relationship of trust, (2) managing awareness and expectations and (3) appropriate timing and  
8 monitoring of the process of behaviour change. These preconditions were regarded as important also  
9 to provide optimal online support. The nurses stressed that a coach providing human support and  
10 integration with regular care were essential elements to achieve this. They expressed, however,  
11 different ideas on its implementation (**Figure 1**).

13 **Figure 1.** Schematic visualization of the main themes and their connections

15 As mentioned in the introduction, realising and maintaining health behaviour change is notoriously  
16 complex. This was confirmed by the nurses we interviewed, but their clinical experience provided us  
17 with clear preconditions for optimal behaviour change support. The nurses used slightly different  
18 approaches to fulfil these preconditions, both in their current practice and in their ideas on online  
19 support. To establish a relationship of trust, the Dutch nurses relied more on face-to-face contact than  
20 the Finnish nurses, which appeared to make them more sceptical about the effectiveness of online  
21 coaching. The Finnish nurses took a mainly supportive role in monitoring whereas Dutch nurses  
22 emphasised a more directive role for themselves and the general practice, with regard to medical  
23 aspects of preventive guidance. This different attitude towards patient' autonomy is of interest and  
24 may be influenced by different factors, including health care culture, the geographical factor, the nurse  
25 factor and the patient factor. Regarding health care culture, **Box 3** describes that, although aims of  
26 preventive care are very similar between Finland and the Netherlands, patient empowerment and  
27 patient autonomy have received more emphasis in Finland than in the Netherlands. The nurses' ideas  
28 about their own responsibilities and patient autonomy may be aligned to the way patient-autonomy is  
29 being shaped in the two healthcare systems as well as to the description of nurses' responsibilities in  
30 local cardiovascular risk management guidelines. The different attitudes on face-to-face contact can be  
31 further understood from the perspective of geography. Finland is a large but very sparsely populated  
32 country and the Netherlands are a very small but densely populated country. This has influenced  
33 current organisation and accessibility of care and likely also attitude towards care (see **Box 3**). In this  
34 light, the step towards online care is likely to be smaller for the Finnish nurses. Last, the differences  
35 between the patient populations' age may have also influenced our findings, since the nurses might see  
36 more potential for eHealth applications in younger patients and regard them as more autonomous in  
37 their health behaviours.

1  
2  
3 1 Our results concerning dementia prevention are very preliminary but of special interest. The Finnish  
4 2 nurses liked the idea of including cognitive health as a goal for cardiovascular preventive care, as  
5 3 dementia was regarded a growing public health problem and a combined approach could increase  
6 4 people's motivation to engage in behaviour change. However, the nurses felt they could not provide  
7 5 proper support, given their limited knowledge and training on one hand, and limited extent of final  
8 6 scientific evidence on the other.  
9  
10  
11  
12  
13

### 14 8 **Strengths and limitations**

15 9 The HATICE project is novel in its aim to develop a generic innovative cardiovascular prevention  
16 10 strategy for older people that can be used across European healthcare systems, especially since it  
17 11 involves eHealth. Our qualitative research design enabled us to use the best practices of nurses experts  
18 12 in 'traditional' face-to-face cardiovascular preventive care to make recommendations for optimal  
19 13 health behaviour change support through novel internet-platforms. In qualitative research,  
20 14 international joint analyses are not common because of language barriers. To overcome these, we put  
21 15 much effort in the alignment of our research methodology. The frequent interactions and extensive  
22 16 meetings of the research teams enabled us to explore our findings in the context of the local health  
23 17 care systems. Following grounded theory methodology<sup>25</sup>, we deliberately selected nurses that we  
24 18 regarded experts in cardiovascular preventive care. Our research also has some limitations that may  
25 19 have influenced our findings. Information on non-participation was limited. The Finnish nurses had on  
26 20 average more years of clinical experience with CV prevention than the Dutch nurses. The patient  
27 21 populations of the Finnish and Dutch nurses were not identical with respect to age. This both may  
28 22 have influenced our findings. However, since the content of clinical experience of both groups was  
29 23 very similar and both countries have similar aims for cardiovascular prevention, we deem the selection  
30 24 of these nurses appropriate for our research purpose. Since we only performed two focus groups, we  
31 25 cannot exclude that a wider range of views could have been collected. For example, one might expect  
32 26 that themes related to training and education requirements would have emerged more prominently  
33 27 from the discussions, but this issue only was mentioned with regard to cognitive health. A further  
34 28 limitation is that cognitive health was only discussed with the Finnish nurses. This issue should be  
35 29 elaborated further in future studies. The striking similarities in the principal themes found in both  
36 30 countries and the consistency of our findings with previous literature mitigates fears that our samples  
37 31 were too limited. Last, when reviewing a summary of our findings, the nurses confirmed that their  
38 32 experiences and views were reflected and did not add new ones, emphasising that the most relevant  
39 33 themes were captured.  
40  
41  
42  
43  
44  
45  
46  
47  
48  
49  
50  
51  
52  
53  
54  
55  
56

### 57 35 **Comparison with existing literature**

58 36 The importance of a relationship of trust, clarifying patients expectations and providing personally  
59 37 tailored support were also main themes in other European qualitative studies on cardiovascular  
60

1  
2  
3 1 preventive care with nurses or patients<sup>28-32</sup>. The positive attitude of the Finnish nurses on self-  
4 2 management of medical issues was consistent with another Finnish study about nurses' and  
5 3 physicians' perceptions on patient's responsibilities in self-care<sup>33</sup>. The reserved attitude of the Dutch  
6 4 nurses was also reflected in a survey among Dutch healthcare professionals, where 50% feared that  
7 5 patient's direct access to their medical record would cause misunderstandings and unnecessary  
8 6 anxiety<sup>34</sup>. A recent qualitative systematic review on nurses' experiences of facilitators and barriers of  
9 7 using telehealth also reported on both positive and negative attitudes of nurses towards telehealth.  
10 8 With regard to the nurse-patient relationship, nurses mentioned on the positive side that telehealth  
11 9 could improve trusting relationships and lower access to care. On the negative side nurses reported  
12 10 telehealth could lead to a loss of human contact. Differences in attitudes were not linked to local health  
13 11 care cultures<sup>35</sup>. Finally, the conviction of all nurses in our study that a coach was essential to  
14 12 complement the internet-platform, is supported by a meta-analysis we performed showing that  
15 13 internet-interventions combined with human support were more effective than 'stand-alone'  
16 14 interventions<sup>36</sup>.

### 15 **Implications for practice**

16 Finnish and Dutch nurses have similar experiences with and views on supporting behaviour change for  
17 18 cardiovascular prevention, but use different practical approaches towards their patients. Including the  
19 19 maintenance of cognitive health as a goal of cardiovascular prevention can provide novel opportunities  
20 20 to frame health behaviour change for both prevention of dementia and CVD and might augment  
21 21 people's motivation for prevention, but this suggestion should be studied further. The nurses'  
22 22 experiences provide valuable directions for shaping online support in internet-platforms for  
23 23 cardiovascular self-management. This study also indicates that, when introducing new forms of  
24 24 preventive healthcare that involve patient self-management, like internet-platforms, local healthcare  
practices are to be taken into account to achieve optimal engagement.

25

26

27

28



## 1 ADDITIONAL INFORMATION

### 2 Contributors

3 Study design: CB, ER, EMvC, HS, FM and MK. Data acquisition: CB, MB and AR. Data analysis:  
4 CB, UA, MB and AR. Interpretation of results: CB, UA, MB, AR, FM, EMvC and JP. Drafting of the  
5 manuscript: CB. Critical revision of the manuscript for important intellectual content: all authors.

### 6 Funding

7 The research leading to these results has received funding from the European Union Seventh  
8 Framework Programme for the HATICE-project (FP7/2007-2013, grant agreement n° 305374) and the  
9 Multimodal preventive trials for Alzheimer's Disease: towards multinational strategies – programme  
10 (MIND-AD: MIND-AD Academy of Finland (grant agreement n°291803), MIND-AD VTR, Kuopio  
11 University Hospital ((grant agreement n°5772815) and MIND-AD Academy of Sweden (Swedish  
12 Research Council, 529-2014-7503)).

### 14 Competing interests

15 The authors have declared no competing interests.

### 17 Ethical approval

18 In the Netherlands, the study was presented to the medical ethics committee of the Academic Medical  
19 Centre in the Netherlands and a waiver was provided. In Finland, application for ethical approval nor a  
20 waiver were required. Written informed consent was obtained from all participants in both countries.

### 22 Data sharing statement

23 Data will not be made publicly available. Please contact the corresponding author for more  
24 information.

### 25 Acknowledgements

26 We thank all Finnish and Dutch nurses for their participation in the study, Suzanne Ligthart, Carin  
27 Miedema, Paulien Vermunt, Floor Rooskens (respectively discussion moderator, assistant-moderator  
28 and assistants in transcription and coding for the Dutch meetings), Lotta Salo and Ejja Pietilä  
29 (organisation and summary notes of the Finnish meeting) for their assistance to the study.



1  
2  
3 **1 REFERENCES**

- 4 2 1. Oliver D. 21st century health services for an ageing population: 10 challenges for general practice.  
5 3 *The British journal of general practice : the journal of the Royal College of General*  
6 4 *Practitioners* 2012;62(601):396-7. doi: 10.3399/bjgp12X653435 [published Online First:  
7 5 2012/08/08]
- 8 6 2. Wu YT, Fratiglioni L, Matthews FE, et al. Dementia in western Europe: epidemiological evidence  
9 7 and implications for policy making. *The Lancet Neurology* 2016;15(1):116-24. doi:  
10 8 10.1016/s1474-4422(15)00092-7 [published Online First: 2015/08/25]
- 11 9 3. de Bruijn RF, Bos MJ, Portegies ML, et al. The potential for prevention of dementia across two  
12 10 decades: the prospective, population-based Rotterdam Study. *BMC medicine* 2015;13:132.  
13 11 doi: 10.1186/s12916-015-0377-5 [published Online First: 2015/07/22]
- 14 12 4. Kivipelto M, Ngandu T, Laatikainen T, et al. Risk score for the prediction of dementia risk in 20  
15 13 years among middle aged people: a longitudinal, population-based study. *The Lancet*  
16 14 *Neurology* 2006;5(9):735-41. doi: 10.1016/s1474-4422(06)70537-3 [published Online First:  
17 15 2006/08/18]
- 18 16 5. Norton S, Matthews FE, Barnes DE, et al. Potential for primary prevention of Alzheimer's disease:  
19 17 an analysis of population-based data. *The Lancet Neurology* 2014;13(8):788-94. doi:  
20 18 10.1016/s1474-4422(14)70136-x [published Online First: 2014/07/18]
- 21 19 6. Peters R, Beckett N, Forette F, et al. Incident dementia and blood pressure lowering in the  
22 20 Hypertension in the Very Elderly Trial cognitive function assessment (HYVET-COG): a  
23 21 double-blind, placebo controlled trial. *The Lancet Neurology* 2008;7(8):683-9. doi:  
24 22 10.1016/s1474-4422(08)70143-1 [published Online First: 2008/07/11]
- 25 23 7. Leventhal H, Weinman J, Leventhal EA, et al. Health psychology: the search for pathways between  
26 24 behavior and health. *Annu Rev Psychol* 2008;59:477-505.
- 27 25 8. Rosenstock IM. The Health Belief Model and Preventive Health Behavior. *Health Education*  
28 26 *Monographs* 1974;2(4):354-86. doi: 10.1177/109019817400200405
- 29 27 9. Ajzen I. From Intentions to Actions: A Theory of Planned Behavior. In: Kuhl J, Beckmann J, eds.  
30 28 Action Control: From Cognition to Behavior. Berlin, Heidelberg: Springer Berlin Heidelberg  
31 29 1985:11-39.
- 32 30 10. Bandura A. Self-efficacy: Toward a unifying theory of behavioral change. *Psychological Review*  
33 31 1977;84(2):191-215. doi: 10.1037/0033-295X.84.2.191
- 34 32 11. Prochaska JO, DiClemente CC, Norcross JC. In search of how people change. Applications to  
35 33 addictive behaviors. *The American psychologist* 1992;47(9):1102-14. [published Online First:  
36 34 1992/09/01]
- 37 35 12. Weinstein ND. The precaution adoption process. *Health Psychology* 1988;7(4):355-86. doi:  
38 36 10.1037/0278-6133.7.4.355
- 39 37 13. Burke LE, Dunbar-Jacob JM, Hill MN. Compliance with cardiovascular disease prevention  
40 38 strategies: a review of the research. *Ann Behav Med* 1997;19(3):239-63.
- 41 39 14. Abraham C, Kelly MP, West R, et al. The UK national institute for health and clinical excellence  
42 40 public health guidance on behaviour change: A brief introduction. *Psychology, Health &*  
43 41 *Medicine* 2009;14(1):1-8. doi: 10.1080/13548500802537903
- 44 42 15. Busse R, Blümel M, Scheller-Kreinsen D, et al. Tackling chronic disease in Europe Strategies,  
45 43 interventions and challenges. *World Health Organization 2010, on behalf of the European*  
46 44 *Observatory on Health Systems and Policies* 2010;20
- 47 45 16. Bodenheimer TL, K.; Holman, H.; Grumbach, K. Patient Self-Management of Chronic Disease in  
48 46 Primary Care. *Jama* 2002;288(19):2469 - 75.
- 49 47 17. Lorig K, Holman H. Self-Management Education: History, Definition, Outcomes, and  
50 48 Mechanisms. *Ann Behav Med* 2003;26(1):1-7.
- 51 49 18. Griffiths F, Lindenmeyer A, Powell J, et al. Why are health care interventions delivered over the  
52 50 internet? A systematic review of the published literature. *Journal of medical Internet research*  
53 51 2006;8(2):e10. doi: 10.2196/jmir.8.2.e10 [published Online First: 2006/07/27]
- 54 52 19. Bennett GG, Glasgow RE. The delivery of public health interventions via the Internet: actualizing  
55 53 their potential. *Annual review of public health* 2009;30:273-92. doi:  
56 54 10.1146/annurev.publhealth.031308.100235 [published Online First: 2009/03/20]

- 1  
2  
3 1 20. Patnode CD, Evans CV, Senger CA, et al. U.S. Preventive Services Task Force Evidence  
4 2 Syntheses, formerly Systematic Evidence Reviews. Behavioral Counseling to Promote a  
5 3 Healthful Diet and Physical Activity for Cardiovascular Disease Prevention in Adults Without  
6 4 Known Cardiovascular Disease Risk Factors: Updated Systematic Review for the US  
7 5 Preventive Services Task Force. Rockville (MD): Agency for Healthcare Research and  
8 6 Quality (US) 2017.
- 9 7 21. Richard E, Jongstra S, Soinen H, et al. Healthy Ageing Through Internet Counselling in the  
10 8 Elderly: the HATICE randomised controlled trial for the prevention of cardiovascular disease  
11 9 and cognitive impairment. *BMJ Open* 2016;6(6):e010806. doi: 10.1136/bmjopen-2015-  
12 10 010806 [published Online First: 2016/06/12]
- 13 11 22. Glaser BG, Strauss AL. The discovery of grounded theory. *Aldine, Chicago* 1967
- 14 12 23. Strauss A, Corbin J. Grounded theory methodology. *Handbook of qualitative research* 1994:273-  
15 13 85.
- 16 14 24. Tong A, Sainsbury P, Craig J. Consolidated criteria for reporting qualitative research (COREQ): a  
17 15 32-item checklist for interviews and focus groups. *International Journal for Quality in Health  
18 16 Care* 2007;19(6):349-57. doi: 10.1093/intqhc/mzm042
- 19 17 25. Foley G, Timonen V. Using Grounded Theory Method to Capture and Analyze Health Care  
20 18 Experiences. *Health Services Research* 2015;50(4):1195-210. doi: 10.1111/1475-6773.12275
- 21 19 26. Jongstra S, Beishuizen C, Andrieu S, et al. Development and Validation of an Interactive Internet  
22 20 Platform for Older People: The Healthy Ageing Through Internet Counselling in the Elderly  
23 21 Study. *Telemedicine journal and e-health : the official journal of the American Telemedicine  
24 22 Association* 2016 doi: 10.1089/tmj.2016.0066 [published Online First: 2016/07/28]
- 25 23 27. Puska P, Nissinen A, Tuomilehto J, et al. The community-based strategy to prevent coronary heart  
26 24 disease: conclusions from the ten years of the North Karelia project. *Annual review of public  
27 25 health* 1985;6:147-93. doi: 10.1146/annurev.pu.06.050185.001051 [published Online First:  
28 26 1985/01/01]
- 29 27 28. Loon MS, van Dijk-de Vries A, van der Weijden T, et al. Ethical issues in cardiovascular risk  
30 28 management: Patients need nurses' support. *Nursing ethics* 2014;21(5):540-53. doi:  
31 29 10.1177/0969733013505313 [published Online First: 2013/11/22]
- 32 30 29. Ligthart SA, van den Eerenbeemt KD, Pols J, et al. Perspectives of older people engaging in nurse-  
33 31 led cardiovascular prevention programmes: a qualitative study in primary care in the  
34 32 Netherlands. *The British journal of general practice : the journal of the Royal College of  
35 33 General Practitioners* 2015;65(630):e41-8. doi: 10.3399/bjgp15X683149 [published Online  
36 34 First: 2014/12/31]
- 37 35 30. Brobeck E, Bergh H, Odencrants S, et al. Primary healthcare nurses' experiences with motivational  
38 36 interviewing in health promotion practice. *Journal of clinical nursing* 2011;20(23-24):3322-  
39 37 30. doi: 10.1111/j.1365-2702.2011.03874.x [published Online First: 2011/10/25]
- 40 38 31. Boase S, Mason D, Sutton S, et al. Tinkering and tailoring individual consultations: how practice  
41 39 nurses try to make cardiovascular risk communication meaningful. *Journal of clinical nursing*  
42 40 2012;21(17-18):2590-8. doi: 10.1111/j.1365-2702.2012.04167.x [published Online First:  
43 41 2012/07/14]
- 44 42 32. Hornsten A, Lindahl K, Persson K, et al. Strategies in health-promoting dialogues--primary  
45 43 healthcare nurses' perspectives--a qualitative study. *Scandinavian journal of caring sciences*  
46 44 2014;28(2):235-44. doi: 10.1111/scs.12045 [published Online First: 2013/04/19]
- 47 45 33. Jallinoja P, Absetz P, Kuronen R, et al. The dilemma of patient responsibility for lifestyle change:  
48 46 Perceptions among primary care physicians and nurses. *Scand J Prim Health Care*  
49 47 2007;25(4):244-49. doi: 10.1080/02813430701691778
- 50 48 34. Krijgsman J, Peeters J, Burghouts A, et al. Between the spark and the flame: 2015 eHealth  
51 49 monitor. *Nictiz and the NIVEL Institute [Dutch Institute for Research in the Healthcare  
52 50 Sector]* 2015;October
- 53 51 35. Koivunen M, Saranto K. Nursing professionals' experiences of the facilitators and barriers to the  
54 52 use of telehealth applications: a systematic review of qualitative studies. *Scandinavian journal  
55 53 of caring sciences* 2018;32(1):24-44. doi: 10.1111/scs.12445 [published Online First:  
56 54 2017/08/05]
- 57  
58  
59  
60

- 1  
2  
3 1 36. Beishuizen CR, Stephan BC, van Gool WA, et al. Web-Based Interventions Targeting  
4 2 Cardiovascular Risk Factors in Middle-Aged and Older People: A Systematic Review and  
5 3 Meta-Analysis. *Journal of medical Internet research* 2016;18(3):e55. doi: 10.2196/jmir.5218  
6 4 [published Online First: 2016/03/13]  
7 5 37. Härmäläinen P, Reponen J, Winblad I. eHealth of Finland - Checkpoint 2008. 2009  
8 6 38. Säkkinen S, Heino A, Häkkinen P, et al. Statistical yearbook on social welfare and health care  
9 7 2015 - National Institute for Health and Welfare. 2016  
10 8 39. Vuorenkoski L, Mladovsky P, Mossialos E. Finland: Health system review. *Health Systems in*  
11 9 *Transition* 2008;10(4):1-168.  
12 10 40. Ministry of Public Health, Welfare and Sport - Healthcare in the Netherlands. 2016  
13 11 41. Schäfer W, Kroneman M, Boerma W, et al. The Netherlands: Health system review *Health*  
14 12 *Systems in Transition* 2010;12(1):1-229.  
15 13 42. Kringos D, Boerma W, Bourgueil Y, et al. The strength of primary care in Europe: an international  
16 14 comparative study. *The British journal of general practice : the journal of the Royal College*  
17 15 *of General Practitioners* 2013;63(616):e742-e50. doi: 10.3399/bjgp13X674422  
18 16 43. <http://www.kaypahoito.fi/web/english/guidelineabstracts/guideline?id=ccs00014> [Finnish Current  
19 17 Care Guideline on hypertension (2014)]. accessed 7-12-2016 2016.  
20 18 44. <http://www.kaypahoito.fi/web/english/guidelineabstracts/guideline?id=ccs00032> [Finnish Current  
21 19 Care Guideline on diabetes (2016)]. accessed 7-12-2016 2016.  
22 20 45. <http://www.kaypahoito.fi/web/english/guidelineabstracts/guideline?id=ccs00055> [Finnish Current  
23 21 Care Guideline on dyslipidaemias (2013)]. accessed 7-12-2016 2016.  
24 22 46. Boomsma L, Lakerveld-Heyl K, Gorter K, et al. Landelijke Eerstelijns Samenwerkings Afspraak  
25 23 Diabetes mellitus type 2. *Huisarts Wet* 2006;49(8):418-24.  
26 24 47. den Boer J. Protocolair CVRM: Nederlands Huisartsen Genootschap 2016.  
27 25 48. Faber E, De Bont M, Beusmans G, et al. Landelijke Eerstelijns Samenwerkings Afspraak CVA.  
28 26 *Huisarts Wet* 2007;50(3):S5-S8.  
29 27 49. <http://www.kanta.fi/en> [Website of the Finnish Patient Data Repository, where Finnish people can  
30 28 access their own medical record]. accessed 7-12-2016 2016.  
31 29  
32 30  
33 31  
34  
35  
36  
37  
38  
39  
40  
41  
42  
43  
44  
45  
46  
47  
48  
49  
50  
51  
52  
53  
54  
55  
56  
57  
58  
59  
60

1 **BOXES**

2

3 **Box 1: the Finnish and Dutch primary care systems**

|                                              | Finland                                                                                                                                                                                                                                                                                                                                                                  | The Netherlands                                                                                                                                                                                                                                                                                                           |
|----------------------------------------------|--------------------------------------------------------------------------------------------------------------------------------------------------------------------------------------------------------------------------------------------------------------------------------------------------------------------------------------------------------------------------|---------------------------------------------------------------------------------------------------------------------------------------------------------------------------------------------------------------------------------------------------------------------------------------------------------------------------|
| Organisation                                 | Primary care is delivered through public healthcare centres and through occupational health facilities <sup>37-39</sup> . Companies offer occupational health facilities to their employees, including both preventive and curative health services, delivered through semi-private healthcare centres that work with nurses in a similar fashion as the public centres. | General practices or small health care centres. In most general practices continuity of care is ensured by allocating the patient to one GP.                                                                                                                                                                              |
| Main focus                                   | Primary care has a strong position and important gatekeeper function. Health promotion and disease prevention are main focus of health care policy for decades.                                                                                                                                                                                                          | Access to care for everyone and solidarity through medical insurance <sup>40 41</sup> . GPs are gatekeepers of the healthcare system and provide acute, chronic and preventive care.                                                                                                                                      |
| Accessibility                                | Often, healthcare centres cover large geographical areas that are sparsely populated and often have shortage of staff, contributing to long waiting lists and lack of personal continuity of care. Due to these waiting lists, many employees go to their occupational health service instead.                                                                           | Since the Netherlands are densely populated, people often live at short distance from their general practice. Access to the GP is efficient, there are no waiting lists <sup>42</sup> .                                                                                                                                   |
| Role of primary care nurses                  | Important position: nurses work in close collaboration with the GPs and have their own consulting hours to assess patients. Regarding cardiovascular prevention, they monitor patients with diabetes, hypertension and dyslipidaemia, as described in national guidelines <sup>43-45</sup> .                                                                             | Important position: since several decades, GPs have delegated tasks to practice nurses in chronic disease management. Currently, nurses provide a substantial part of cardiovascular risk management care, including diabetes care, following regional and national guidelines and work descriptions <sup>9 46-48</sup> . |
| Patient autonomy and eHealth culture to date | The first European country to introduce a law (in 1993) defining the patient's right to access to all medical information and the right to autonomy (patient's informed consent for any medical treatment). All healthcare centres use electronic medical                                                                                                                | Informed consent is ensured by law, but in daily practice, consent is often assumed and only explicitly discussed in case treatment options can have far-reaching consequences <sup>41</sup> . Almost all GPs use electronic medical records. Patients have the right to inspect their                                    |

|  |                                                                                                                                                           |                                                           |
|--|-----------------------------------------------------------------------------------------------------------------------------------------------------------|-----------------------------------------------------------|
|  | records. A national patient data repository is under development to provide patients complete access to their own electronic medical record <sup>49</sup> | medical records, but do not have complete access to them. |
|--|-----------------------------------------------------------------------------------------------------------------------------------------------------------|-----------------------------------------------------------|

**Box 2. Main topics discussed**

**Part 1**

- Prevention of cardiovascular disease and dementia: attitude and experiences
- Good guidance of behaviour change
- Relationship with the patient

**Part 2**

- Attitude towards the internet-platform and online-support
- Role and responsibilities of the internet-coach
- Interaction with the patients online

**Box 3. Key features of the HATICE internet-platform with coaching**

- Patient-centred: the patient can login onto a personal portal to review and manage his/her personal cardiovascular risk profile
- Improving health knowledge: the patient can access educational modules about cardiovascular risk factors and lifestyle
- Goal setting and self-monitoring: the patient can set his/her own goals for behaviour change and monitor how he/she is doing by entering self-measurements or keeping a diary
- Coaching: the coach monitors the patient's self-management and they can communicate online through messages

1  
2  
3  
4  
5  
6  
7  
8  
9  
10  
11  
12  
13  
14  
15  
16  
17  
18  
19  
20  
21  
22  
23  
24  
25  
26  
27  
28  
29  
30  
31  
32  
33  
34  
35  
36  
37  
38  
39  
40  
41  
42  
43  
44  
45  
46  
47  
48  
49  
50  
51  
52  
53  
54  
55  
56  
57  
58  
59  
60

1

For peer review only



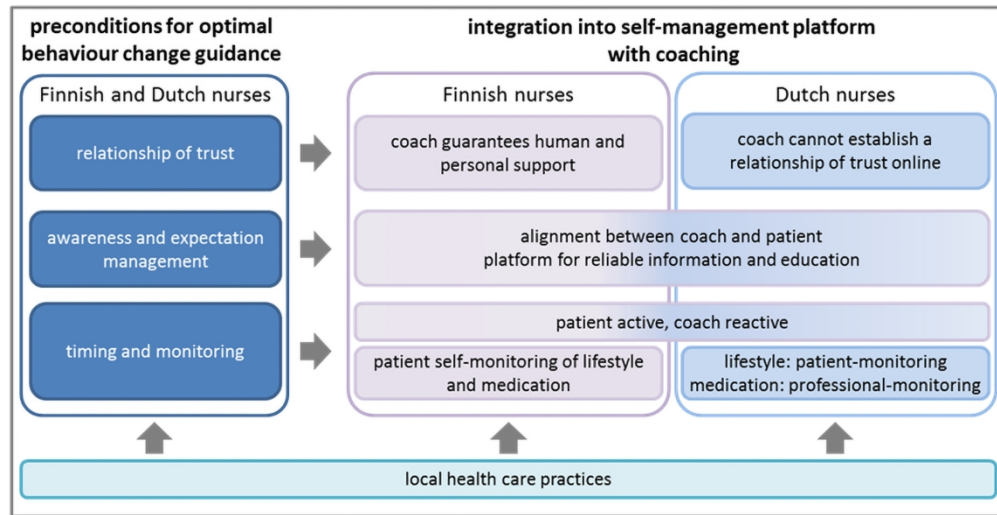

Caption: Figure 1. Schematic visualization of the main themes and their connections  
 Legend: Left, the three main preconditions for good behaviour change guidance in cardiovascular preventive care that both Finnish and Dutch nurses identified, are depicted. Right of this, it is shown how the Finnish and Dutch nurses suggest to realise these preconditions in the online setting. Since there were differences between the nurses this is depicted separately for the Finnish and Dutch nurses. Below it is shown that local health practices influenced both the preconditions (and their operationalization (not shown in figure but explained in results section)) and the integration into online support.

194x99mm (300 x 300 DPI)

**APPENDIX 1 to ‘Integrating nurses’ experiences with supporting behaviour change for cardiovascular prevention into a self-management internet-platform in Finland and the Netherlands: a qualitative study’**

**Appendix 1: COREQ checklist**

| No.                                     | Item                                                                    | Explanation                                                                                                                                                                                                                                                                                                                          | Reported on page no.       |
|-----------------------------------------|-------------------------------------------------------------------------|--------------------------------------------------------------------------------------------------------------------------------------------------------------------------------------------------------------------------------------------------------------------------------------------------------------------------------------|----------------------------|
| Domain 1: Research team and reflexivity |                                                                         |                                                                                                                                                                                                                                                                                                                                      |                            |
| 1                                       | Interviewers                                                            | NL: Pols AJ and Ligthart S<br>FI: Rosenberg A                                                                                                                                                                                                                                                                                        | Not reported in manuscript |
| 2                                       | Credentials of the researchers involved in data collection and analysis | NL: Beishuizen CRL: MD PhD-student; Rooskens F: BSc; Ligthart S: MD, PhD-student; Pols AJ: prof; Moll van Charante EP: MD PhD<br>FI: Akenine U: PhD-student; Barbera M: PhD; Rosenberg A: PhD-student                                                                                                                                | Not reported in manuscript |
| 3                                       | Occupation of the researchers involved in data collection and analysis  | NL: Beishuizen CRL: PhD-student; Rooskens F: medical student; Ligthart S: general practitioner in training, PhD-student; Pols AJ: professor in medical ethics; Moll van Charante EP: postdoc researcher, general practitioner<br>FI: Akenine U: PhD-student, research nurse; Barbera M: postdoc researcher; Rosenberg A: PhD-student | Not reported in manuscript |
| 4                                       | Gender                                                                  | All researchers are female, except for Moll van Charante EP, who is male                                                                                                                                                                                                                                                             | Not reported in manuscript |
| 5                                       | Experience and training                                                 | See main text                                                                                                                                                                                                                                                                                                                        | p5                         |
| 6                                       | Relationship established                                                | NL: there was an indirect relationship between research team and the participants, because the nurses had been involved in a previous research project of the research team in which 2 researchers (Ligthart S and Moll van Charante EP) were also involved<br>FI: no previous relationship established                              | Not reported in manuscript |
| 7                                       | Participant knowledge of the                                            | NL: participants knew the professional background of the moderators                                                                                                                                                                                                                                                                  | Not reported in            |



|                        |                                       |                                                                                                                                                                                                                                                                                     |                            |
|------------------------|---------------------------------------|-------------------------------------------------------------------------------------------------------------------------------------------------------------------------------------------------------------------------------------------------------------------------------------|----------------------------|
|                        | interviewer                           | FI: participants knew the professional background of the moderator                                                                                                                                                                                                                  | manuscript                 |
| 8                      | Interviewer characteristics           | NL: Pols AJ conducts qualitative research on the ethics of use of technology and eHealth in medical care. Ligthart S conducts quantitative and qualitative research on cardiovascular prevention in older people<br><br>FI: Rosenberg A conducts research on prevention of dementia | Not reported in manuscript |
| Domain 2: Study design |                                       |                                                                                                                                                                                                                                                                                     |                            |
| 9                      | Methodological information and theory | See main text                                                                                                                                                                                                                                                                       | P5 and p6                  |
| 10                     | Sampling                              | See main text                                                                                                                                                                                                                                                                       | P5                         |
| 11                     | Method of approach                    | See main text                                                                                                                                                                                                                                                                       | P5                         |
| 12                     | Sample size                           | See main text                                                                                                                                                                                                                                                                       | P5                         |
| 13                     | Non-participation                     | See main text                                                                                                                                                                                                                                                                       | P5                         |
| 14                     | Setting of data collection            | See main text                                                                                                                                                                                                                                                                       | P5                         |
| 15                     | Presence of non-participants          | NL: Eric Moll- van Charante and Pim Happel were present as non-participating audience<br><br>FI: no others were present                                                                                                                                                             | Not reported in manuscript |
| 16                     | Description of sample                 | See main text                                                                                                                                                                                                                                                                       | P5 and p6                  |
| 17                     | Interview guide                       | See main text                                                                                                                                                                                                                                                                       | P6                         |
| 18                     | Repeat interviews                     | Not performed                                                                                                                                                                                                                                                                       |                            |
| 19                     | Audio/visual recording                | See main text                                                                                                                                                                                                                                                                       | P6                         |
| 20                     | Field notes                           | See main text                                                                                                                                                                                                                                                                       | P6                         |
| 21                     | Duration                              | See main text                                                                                                                                                                                                                                                                       | P6                         |

|                                 |                                |                                                                                                                                                                                                                                                                                                                                                                                                             |                            |
|---------------------------------|--------------------------------|-------------------------------------------------------------------------------------------------------------------------------------------------------------------------------------------------------------------------------------------------------------------------------------------------------------------------------------------------------------------------------------------------------------|----------------------------|
| 22                              | Data saturation                | See main text                                                                                                                                                                                                                                                                                                                                                                                               | P7 and P15                 |
| 23                              | Transcripts returned           | Not performed                                                                                                                                                                                                                                                                                                                                                                                               |                            |
| Domain 3: analysis and findings |                                |                                                                                                                                                                                                                                                                                                                                                                                                             |                            |
| 24                              | Number of data coders          | NL: 2<br>FI: 2                                                                                                                                                                                                                                                                                                                                                                                              | P6                         |
| 25                              | Description of the coding tree | See main text (figure 1)                                                                                                                                                                                                                                                                                                                                                                                    | p14                        |
| 26                              | Derivation of themes           | See main text                                                                                                                                                                                                                                                                                                                                                                                               | P6                         |
| 27                              | Software                       | No special qualitative software was used                                                                                                                                                                                                                                                                                                                                                                    |                            |
| 28                              | Participant checking           | See main text                                                                                                                                                                                                                                                                                                                                                                                               | P7 and p15                 |
| 29                              | Quotations presented           | See main text                                                                                                                                                                                                                                                                                                                                                                                               | P8– p13                    |
| 30                              | Data and findings consistent   | See main text                                                                                                                                                                                                                                                                                                                                                                                               | P8 – p13                   |
| 31                              | Clarity of major themes        | See main text and figure 1                                                                                                                                                                                                                                                                                                                                                                                  | P8-p14                     |
| 32                              | Clarity of minor themes        | <p>Within the groups, the Dutch and Finnish nurses shared opinions and experiences on most topics. Between the Dutch and Finnish groups, some interesting differences in opinions and experiences were identified. We choose therefore to focus on these differences when presenting our results, but not on diverse cases within the groups.</p> <p>Minor themes were not discussed due to word limits</p> | Not reported in manuscript |

**APPENDIX 2 to 'Integrating nurses' experiences with supporting behaviour change for cardiovascular prevention into a self-management internet-platform in Finland and the Netherlands: a qualitative study'**

**Appendix 2:** Topic list

| <b>FOCUS GROUP nurses part ONE cardiovascular prevention</b>                                                                                                                                                                                                                                                           |                                                                     |                                                                                                                                                                                                                                                    |
|------------------------------------------------------------------------------------------------------------------------------------------------------------------------------------------------------------------------------------------------------------------------------------------------------------------------|---------------------------------------------------------------------|----------------------------------------------------------------------------------------------------------------------------------------------------------------------------------------------------------------------------------------------------|
| <b>Overview part one</b>                                                                                                                                                                                                                                                                                               | <b>Topic (possible items)</b>                                       | <b>Possible questions</b>                                                                                                                                                                                                                          |
| <i>Aim of the meeting is to learn from the nurses' experiences in cardiovascular prevention: what are best practices to stimulate behaviour change, what is their attitude towards a prevention program for older people via the internet, how would they support people in lifestyle change through the internet?</i> |                                                                     |                                                                                                                                                                                                                                                    |
|                                                                                                                                                                                                                                                                                                                        | <b>CVD prevention</b>                                               |                                                                                                                                                                                                                                                    |
|                                                                                                                                                                                                                                                                                                                        | Activities on CVD prevention                                        | Do you currently conduct activities on CVD prevention?                                                                                                                                                                                             |
|                                                                                                                                                                                                                                                                                                                        | Experiences / lessons learned                                       | What are your experiences and lessons learned, especially regarding giving 'medical' guidance versus giving lifestyle guidance and regarding behavior change?                                                                                      |
|                                                                                                                                                                                                                                                                                                                        | <b>Dementia prevention</b>                                          | In the last decade, we got more and more indications from neurological research that risk factors for cardiovascular disease are also risk factors for dementia. So, possibly, reducing cardiovascular risk may also postpone or prevent dementia. |
|                                                                                                                                                                                                                                                                                                                        | Attitude towards dementia prevention                                | What is your attitude / your ideas regarding dementia prevention?                                                                                                                                                                                  |
|                                                                                                                                                                                                                                                                                                                        | Awareness of dementia risk and compliance to lifestyle change       | Most people are not yet aware of the association between CV risk and dementia, but do seem to be very afraid of dementia. Do you think that more awareness would enhance compliance/adherence to lifestyle change? What are your ideas on this?    |
|                                                                                                                                                                                                                                                                                                                        | <b>Relationship with participants and regular healthcare system</b> |                                                                                                                                                                                                                                                    |
|                                                                                                                                                                                                                                                                                                                        | Guiding lifestyle change                                            | Which factors could contribute to good guidance of lifestyle change?                                                                                                                                                                               |
|                                                                                                                                                                                                                                                                                                                        | Relationship with patient                                           | Which factors could contribute to a good relationship with your patient?                                                                                                                                                                           |
|                                                                                                                                                                                                                                                                                                                        | Relation with GP and regular practice assistant                     | How should the platform coach link with the patients' GP and regular practice assistant/nurse (the regular healthcare system)?                                                                                                                     |

|                                                                                                                           |                                           |                                                                                                                                |
|---------------------------------------------------------------------------------------------------------------------------|-------------------------------------------|--------------------------------------------------------------------------------------------------------------------------------|
|                                                                                                                           | Attitude towards internet intervention    | What is your attitude towards a prevention program via the internet (with support from a coach)?                               |
|                                                                                                                           |                                           | How should the platform coach link with the patients' GP and regular practice assistant/nurse (the regular healthcare system)? |
| <b>FOCUS GROUP nurses part TWO The platform</b>                                                                           |                                           |                                                                                                                                |
| <i>Assistant moderator explains about HATICE and platform by showing the powerpoint with screen shots of the platform</i> |                                           |                                                                                                                                |
|                                                                                                                           | <b>Information required for support</b>   | Imagine yourself being a coach using the internet-platform:                                                                    |
|                                                                                                                           |                                           | Which kind of information regarding the participants do you need to be able to support them?                                   |
|                                                                                                                           | <b>Role and responsibilities</b>          |                                                                                                                                |
|                                                                                                                           | Responsibility goal setting               | Who is responsible for goal setting? (capability of patients)                                                                  |
|                                                                                                                           | Role in lifestyle groups                  | How do you see your role in creating lifestyle groups and how can participation be encouraged?                                 |
|                                                                                                                           | <b>Interaction with participants</b>      |                                                                                                                                |
|                                                                                                                           | Experience with motivational interviewing | Do you have experience with motivational interviewing, how could this technique be used by the coach?                          |
|                                                                                                                           | Frequency of contact                      | How often would you like to have contact with your patient?                                                                    |
|                                                                                                                           | Mode of communication                     | Which mode of communication do you prefer? (phone, skype +/- webcam, email, chat...)                                           |
|                                                                                                                           | Network of support                        | What should be the role of the participant network of support in lifestyle change and how can this network be engaged?         |
|                                                                                                                           | Alerts / reminders                        | Do you like to receive automatic alerts/reminders when patients have alarming values or did not log-on?                        |
| <i>Assistant moderator and moderator verify key messages from focus group</i>                                             |                                           |                                                                                                                                |
| <i>Moderator thanks nurses</i>                                                                                            |                                           |                                                                                                                                |

# BMJ Open

## Integrating nurses' experiences with supporting behaviour change for cardiovascular prevention into a self-management internet-platform in Finland and the Netherlands: a qualitative study

|                                 |                                                                                                                                                                                                                                                                                                                                                                                                                                                                                                                                                                                                                                                                                                                                                                                                                                                                                                                                                                                                                                                                                                                                                                                                              |
|---------------------------------|--------------------------------------------------------------------------------------------------------------------------------------------------------------------------------------------------------------------------------------------------------------------------------------------------------------------------------------------------------------------------------------------------------------------------------------------------------------------------------------------------------------------------------------------------------------------------------------------------------------------------------------------------------------------------------------------------------------------------------------------------------------------------------------------------------------------------------------------------------------------------------------------------------------------------------------------------------------------------------------------------------------------------------------------------------------------------------------------------------------------------------------------------------------------------------------------------------------|
| Journal:                        | <i>BMJ Open</i>                                                                                                                                                                                                                                                                                                                                                                                                                                                                                                                                                                                                                                                                                                                                                                                                                                                                                                                                                                                                                                                                                                                                                                                              |
| Manuscript ID                   | bmjopen-2018-023480.R2                                                                                                                                                                                                                                                                                                                                                                                                                                                                                                                                                                                                                                                                                                                                                                                                                                                                                                                                                                                                                                                                                                                                                                                       |
| Article Type:                   | Research                                                                                                                                                                                                                                                                                                                                                                                                                                                                                                                                                                                                                                                                                                                                                                                                                                                                                                                                                                                                                                                                                                                                                                                                     |
| Date Submitted by the Author:   | 13-Mar-2019                                                                                                                                                                                                                                                                                                                                                                                                                                                                                                                                                                                                                                                                                                                                                                                                                                                                                                                                                                                                                                                                                                                                                                                                  |
| Complete List of Authors:       | Beishuizen, Cathrien; Academic Medical Center, General Practice Akenine, Ulrika; Karolinska Institutet and Karolinska University Hospital, Division of Clinical Geriatrics , Department of Neurobiology, Care Sciences and Society<br>Barbera, Mariagnese; University of Eastern Finland, Clinical Medicine/Neurology<br>Rosenberg, Anna; University of Eastern Finland, Clinical Medicine/Neurology<br>Fallah Pour, Mandana; Karolinska Institutet, Division of Occupational Therapy, Department of Neurobiology, Care Sciences and Society<br>Richard, Edo; Academic Medical Centre, University of Amsterdam, Neurology; Radboud University Medical Center, Department of Neurology, Donders Institute for Brain, Cognition and Behaviour<br>Soininen, Hilikka; University of Eastern Finland, Clinical Medicine/Neurology<br>Mangialasche, Francesca; Karolinska Institutet, Division of Geriatric Epidemiology<br>Kivipelto, Miia; Karolinska Institutet, Division of Geriatric Epidemiology; University of Eastern Finland, Clinical Medicine/Neurology<br>Pols, A.; AMC, Department of General Practice, Section of Medical Ethics, Moll van Charante, Eric; Academic Medical Center, General Practice |
| <b>Primary Subject Heading</b>: | Cardiovascular medicine                                                                                                                                                                                                                                                                                                                                                                                                                                                                                                                                                                                                                                                                                                                                                                                                                                                                                                                                                                                                                                                                                                                                                                                      |
| Secondary Subject Heading:      | General practice / Family practice, Health services research, Nursing, Patient-centred medicine, Qualitative research                                                                                                                                                                                                                                                                                                                                                                                                                                                                                                                                                                                                                                                                                                                                                                                                                                                                                                                                                                                                                                                                                        |
| Keywords:                       | QUALITATIVE RESEARCH, PRIMARY CARE, Nurse-led care, eHealth, Cardiovascular prevention, Dementia prevention                                                                                                                                                                                                                                                                                                                                                                                                                                                                                                                                                                                                                                                                                                                                                                                                                                                                                                                                                                                                                                                                                                  |
|                                 |                                                                                                                                                                                                                                                                                                                                                                                                                                                                                                                                                                                                                                                                                                                                                                                                                                                                                                                                                                                                                                                                                                                                                                                                              |

SCHOLARONE™  
Manuscripts

1  
2  
3  
4  
5  
6  
7  
8  
9  
10  
11  
12  
13  
14  
15  
16  
17  
18  
19  
20  
21  
22  
23  
24  
25  
26  
27  
28  
29  
30  
31  
32  
33  
34  
35  
36  
37  
38  
39  
40  
41  
42  
43  
44  
45  
46  
47  
48  
49  
50  
51  
52  
53  
54  
55  
56  
57  
58  
59  
60

1  
2  
3 1 **Integrating nurses' experiences with supporting behaviour change for**  
4 **cardiovascular prevention into a self-management internet-platform in**  
5 **Finland and the Netherlands: a qualitative study**  
6  
7  
8  
9  
10

11 5 *Authors*

12 6 Beishuizen CRL<sup>1\*</sup>, Akenine U<sup>2</sup>, Barbera M<sup>3</sup>, Rosenberg A<sup>3</sup>, Fallahpour M<sup>4</sup>, Richard E<sup>5,6</sup>, Soininen H<sup>3</sup>,  
13 7 <sup>7</sup>, Mangialasche F<sup>8</sup>, Kivipelto M<sup>2, 3,9</sup>, Pols AJ<sup>10</sup> and Moll van Charante EP<sup>1</sup>

14 8  
15 9 \*corresponding author

16 10 address: Department of General Practice  
17 11 Amsterdam UMC/University of Amsterdam  
18 12 Meibergdreef 9, 1100 DD  
19 13 Amsterdam, Netherlands

20 14 email: [c.r.beishuizen@amc.uva.nl](mailto:c.r.beishuizen@amc.uva.nl)

21 15 phone: +31 6 16359453  
22 16

23 17 *Affiliations*

24 18 <sup>1</sup> Department of General Practice, Amsterdam UMC/University of Amsterdam, Amsterdam, The Netherlands

25 19 <sup>2</sup> Division of Clinical Geriatrics, Department of Neurobiology, Care Sciences and Society, Karolinska Institutet,  
26 20 and Karolinska University Hospital, Stockholm, Sweden

27 21 <sup>3</sup> Institute of Clinical Medicine/Neurology, University of Eastern Finland, Kuopio, Finland

28 22 <sup>4</sup> Department of Neurobiology Care Sciences and Society, Division of Occupational Therapy, Karolinska  
29 23 Institutet, Huddinge, Sweden

30 24 <sup>5</sup> Department of Neurology, Amsterdam UMC/University of Amsterdam, Amsterdam, The Netherlands

31 25 <sup>6</sup> Department of Neurology, Donders Institute for Brain, Cognition and Behaviour, Radboud University Medical  
32 26 Center, Nijmegen, The Netherlands

33 27 <sup>7</sup> Neurocenter, Neurology, Kuopio University Hospital, Kuopio, Finland.

34 28 <sup>8</sup> Aging Research Center, Karolinska Institutet and Stockholm University, Stockholm, Sweden

35 29 <sup>9</sup> Chronic Disease Prevention Unit, National Institute for Health and Welfare, Helsinki,, Finland

36 30 <sup>10</sup> Section of Medical Ethics, Department of General Practice, Amsterdam UMC/University of Amsterdam,  
37 31 Amsterdam, The Netherlands  
38 32

39 33 **Word count**

40 34 Abstract: 263

41 35 Total text (main text and quotations): 3,688

42 36 Main text only: 2,591

43 37 Quotations only: 1,097  
44 38  
45  
46  
47  
48  
49  
50  
51  
52  
53  
54  
55  
56  
57  
58  
59  
60

## Abstract

**Objectives:** Global ageing is linked to an increased burden of cardiovascular disease (CVD) and dementia, which calls for better prevention strategies. Self-management and eHealth applications are regarded as promising strategies to support prevention. The aim of this study was to explore nurses' best practices concerning behaviour change guidance for cardiovascular (CV) prevention in order to learn how to optimally integrate them into a coach-supported internet-platform for CV self-management.

**Design:** Qualitative focus group study in Finland and the Netherlands. Discussions were audiotaped and transcribed. Data were thematically analysed following principles of grounded theory.

**Setting:** Dutch and Finnish primary care settings.

**Participants:** Six Finnish and seven Dutch primary care nurses with experience in CV prevention

**Results:** Similar best practices were found in both countries and comprised of: (1) establishing a relationship of trust, (2) managing awareness and expectations, and (3) appropriate timing and monitoring of the process of behaviour change. However, the Finnish and Dutch nurses used different approaches for accomplishment of these practices, which was reflected in their recommendations for online-support. Both groups emphasised that online-support should be combined with human-support and integrated into regular care. Finnish nurses had more confidence in patient self-management and remote communication than Dutch nurses, who emphasised the importance of face-to-face contact and preferred to keep control of medical aspects of prevention.

**Conclusions:** Differences in Dutch and Finnish's nurses' practices for supporting CV prevention appear to reflect their local healthcare practices, which should be taken into account when designing internet-platforms for health self-management. Including cognitive health as a goal of CV prevention might stimulate motivation for health behaviour change.

**Keywords:** cardiovascular prevention, dementia prevention, behaviour change, eHealth, primary care, nurse-led care, qualitative research

### Strengths and limitations of this study

- This international focus group study directly compares best practices of Finnish and Dutch primary care nurses in cardiovascular prevention
- Language barriers were overcome by closely aligning our research methodologies, multiple iterations in the analysis and extensive meetings between the research teams
- Our original approach, following grounded theory, enabled us to learn from the best practices of nurse experts in 'traditional' face-to-face cardiovascular preventive care and integrate these



1  
2  
3 1 into recommendations for optimal support for health behaviour change through novel eHealth  
4 2 applications

- 5 3
- 6 4 • Since our samples and number of focus groups were limited, we are aware that our findings  
7 5 are not exhaustive, especially since we found that local health care practices substantially  
8 6 impacted the study results
  - 9 7 • Due to the exploratory nature of our study, our findings are preliminary and might be  
10 8 influenced by differences in nurses' clinical experience and in the ages of their patient  
11 9 populations  
12 10
- 13  
14  
15  
16  
17  
18  
19  
20  
21  
22  
23  
24  
25  
26  
27  
28  
29  
30  
31  
32  
33  
34  
35  
36  
37  
38  
39  
40  
41  
42  
43  
44  
45  
46  
47  
48  
49  
50  
51  
52  
53  
54  
55  
56  
57  
58  
59  
60

For peer review only

# 1 Manuscript

## 2 INTRODUCTION

3 Global ageing places an increasing demand on healthcare systems, partially due to the absolute rise in  
4 cardiovascular disease (CVD) and dementia cases<sup>1 2</sup>. As these disorders share a number of risk  
5 factors, effective cardiovascular (CV) prevention could also lead to the prevention of dementia<sup>3-6</sup>. CV  
6 prevention requires health behaviour change, the process of “initiating and maintaining behaviours  
7 that reduce health risks and control existent chronic disease”<sup>7</sup>. In CV prevention, core behaviours  
8 consist of a healthy lifestyle (healthy diet, sufficient physical activity and non-smoking) and adherence  
9 to medication. Although the processes supporting health behaviour change have been theorised  
10 extensively<sup>8-12</sup>, putting them into practice remains a challenge<sup>13 14</sup> and novel, more effective,  
11 approaches are needed<sup>15</sup>. Two strategies of current interest are self-management and eHealth. In self-  
12 management, the individual, instead of the healthcare professional, takes the lead in the management  
13 of his/her risk factors, and therefore in behaviour change<sup>16 17</sup>. eHealth applications are attractive  
14 because of their wide reach and their potential to support self-management because of their suitability  
15 for health education, interactivity and monitoring<sup>18 19</sup>. Although researchers and policymakers have  
16 high expectations of eHealth and self-management, more intensive face-to-face interventions still  
17 achieve better results than eHealth applications<sup>20</sup>. To learn how self-management and behaviour  
18 change could be best stimulated and maintained online, we consulted ‘experts in the field’, i.e. nurses  
19 experienced in health behaviour change in the context of CV prevention.

20  
21 This project is part of the Healthy Ageing Through Internet Counselling in the Elderly (HATICE)  
22 study, which includes a European randomised controlled trial testing a coach-supported internet-  
23 platform for self-management of cardiovascular risk factors in older people to prevent CVD and  
24 cognitive decline<sup>21</sup>. In an international focus group study, we aimed to (1) explore nurses’ best  
25 practices concerning behaviour change guidance for cardiovascular prevention, including the potential  
26 for dementia prevention, and (2) learn how to integrate their practices into a coach-supported internet-  
27 platform (the online-support setting). This study took place in Finland and the Netherlands, two of the  
28 three countries that participated in the HATICE-study. Since the HATICE project aims to develop an  
29 internet-platform that is implementable across all European healthcare systems, we also explored the  
30 influence of local healthcare practices.

31

## 1 METHODS

### 2 Design

3 We performed an international qualitative focus group study following principles of grounded theory<sup>22</sup>  
 4 <sup>23</sup>. The COREQ-checklist is included for full methodological information (**Appendix 1**)<sup>24</sup>.

### 5 Participants and setting

6 For sampling, we followed the grounded theory methodology of studying a health care practice by  
 7 consulting field experts <sup>25</sup>. In this perspective, Finnish and Dutch primary care nurses experienced in  
 8 CV preventive care were considered most eligible for this study and selective purposive samples were  
 9 obtained. In Finland, occupational healthcare nurses were recruited because of their important role in  
 10 preventive CV care (please see **Box 1** for a description of Finnish and Dutch primary health care  
 11 systems and the position of Finnish occupational health). Fourteen nurses working in a semi-private  
 12 healthcare centre in Kuopio (Eastern Finland) were invited by email and telephone and six female  
 13 nurses (43%) consented to participate. Being occupational health nurses, they cared mostly for patients  
 14 of working age. Duration of clinical experience with CV prevention ranged from 2 to 35 years. In the  
 15 Netherlands, we recruited primary care nurses experienced in cardiovascular risk management. A  
 16 group of 32 nurses experienced in CV preventive care working in general practices in two urban areas  
 17 in the centre of the Netherlands was invited by email and telephone. Seven female nurses (22%)  
 18 consented to participate. The unanimous reason for non-participation by Finnish and Dutch nurses was  
 19 lack of time. The Dutch participating nurses cared for patients of all ages. Duration of clinical  
 20 experience with CV prevention ranged from 3 to 11 years. **Table 1** contains further characteristics of  
 21 the nurses.

22  
 23 **Box 1.** The Finnish and Dutch primary care systems

24  
 25 **Table 1.** Characteristics of the participating Finnish and Dutch nurses

| N | Coun | Age | Training                  | Typ of CVD prevention | Internet use at work                            |
|---|------|-----|---------------------------|-----------------------|-------------------------------------------------|
| r | try* |     |                           |                       |                                                 |
| 1 | FI   | 55  | occupational health nurse | prim/sec prev         | email, guideline use, referral, patient contact |
| 2 | FI   | 42  | occupational health nurse | prim/sec prev         | email, guideline use, referral                  |
| 3 | FI   | 25  | occupational health nurse | prim/sec prev         | email, guideline use, referral, patient contact |
| 4 | FI   | 45  | occupational health nurse | prim/sec prev         | email, guideline use, referral, patient contact |
| 5 | FI   | 49  | occupational health nurse | prim/sec prev         | email, guideline use, referral, patient contact |
| 6 | FI   | 60  | occupational health nurse | prim/sec prev         | guideline use, patient contact                  |

|   |    |    |                                            |               |                                                 |   |   |   |    |    |    |    |    |    |    |    |
|---|----|----|--------------------------------------------|---------------|-------------------------------------------------|---|---|---|----|----|----|----|----|----|----|----|
| 1 | 2  | 3  | 4                                          | 5             | 6                                               | 7 | 8 | 9 | 10 | 11 | 12 | 13 | 14 | 15 | 16 | 17 |
| 1 | NL | 43 | general nurse, practice nurse <sup>a</sup> | prim/sec prev | email, guideline use, referral, patient contact |   |   |   |    |    |    |    |    |    |    |    |
| 2 | NL | 49 | practice nurse                             | prim/sec prev | email, guideline use, referral, patient contact |   |   |   |    |    |    |    |    |    |    |    |
| 3 | NL | 51 | practice nurse                             | prim prev     | email, guideline use, referral, patient contact |   |   |   |    |    |    |    |    |    |    |    |
| 4 | NL | 53 | general nurse, practice nurse              | prim/sec prev | email, guideline use, referral                  |   |   |   |    |    |    |    |    |    |    |    |
| 5 | NL | 42 | practice nurse                             | sec prev      | email, guideline use, referral, patient contact |   |   |   |    |    |    |    |    |    |    |    |
| 6 | NL | 45 | general nurse, practice nurse <sup>b</sup> | prim/sec prev | email, guideline use, referral, patient contact |   |   |   |    |    |    |    |    |    |    |    |
| 7 | NL | 65 | general nurse, practice nurse              | prim/sec prev | email, guideline use, referral, patient contact |   |   |   |    |    |    |    |    |    |    |    |

\*abbreviations: CVD = cardiovascular disease, FI = Finland, prim = primary, sec = secondary, prev = prevention, NL = the Netherlands, DM = diabetes mellitus, COPD = chronic obstructive pulmonary disease

<sup>a</sup> practice nurse: received specific nursing training to work in general practice

<sup>b</sup> general nurse: received general nursing training to work as a hospital-based general nurse

The study was presented to the medical ethics committee of the Academic Medical Centre in the Netherlands and a waiver was provided. In Finland, neither application for ethical approval nor a waiver was required. All participants provided written informed consent.

## Data collection

We conducted one focus group in the Netherlands (autumn 2013) and one in Finland (December 2015). We regarded focus groups as the most appropriate method to answer our research aims, because they enabled us to explore the experiences and attitudes of the nurses as thoroughly as possible, as the nurses could directly respond to each other's opinions and develop their ideas through the discussion. In each country, an experienced focus group moderator chaired the sessions, while an assistant-moderator noted non-verbal communication and summarised the discussions. The discussion was conducted using a topic list as a flexible guide (**Box 2** and **Appendix 2**). After the Dutch session, the topic list was refined for the Finnish focus group, to further explore the following topics: the nurse-patient relationship, attitudes towards eHealth applications, shaping optimal online support, the role of the nurse in this versus the role of the patient, and dementia prevention. The moderators asked open-ended questions, following principles of grounded theory, to inductively approach the data. Both moderators first asked the nurses about their activities in cardiovascular prevention and how they supported their patients in the process of behaviour change (**Part 1** of the focus group). The Finnish moderator also asked the nurses about their experiences with prevention of dementia. In **Part 2** of the focus group, the HATICE internet-platform was presented (**Box 3**, a full description of the platform is reported elsewhere <sup>26</sup>) and the nurses were asked how they would optimally support their patients in an

1  
2  
3 1 online setting. Both sessions lasted approximately two hours. The discussions were audio-recorded  
4 2 and transcribed.  
5  
6 3

7  
8 4 **Box 2.** Main topics discussed  
9 5

10 6 **Box 3.** Key features of the HATICE internet-platform with coaching  
11 7

12 7  
13  
14 8 **Coding and analysis**

15 9 In each country, two researchers coded and thematically analysed the transcripts following principles  
16 10 of grounded theory<sup>22 23</sup>. Themes were derived inductively from the data and were not hypothesised  
17 11 beforehand. Open coding and identification of initial themes was first performed by the two  
18 12 researchers independently. Thereafter, codes and themes were compared. Dissimilarities were  
19 13 discussed until consensus was reached. Initial theme structure was then discussed with the senior  
20 14 researchers involved. In Finland, since the researchers were not Finnish native speakers, the transcript  
21 15 was translated into English and cross-checked by the Finnish focus group moderator, who was a  
22 16 Finnish native and fluent English speaker. In this way, the complete analysis of the Finnish data could  
23 17 be performed in English. After the initial analysis performed locally, themes and corresponding  
24 18 quotations of the Dutch sessions were also translated into English. The two research teams then had  
25 19 two meetings to discuss the structure of main themes and categories. The analysis-phase<sup>22 23</sup> was an  
26 20 iterative process, during which the researchers from both teams repeatedly returned to their data-files  
27 21 to add, merge and refine themes, until a definite theme structure was agreed on by all authors. During  
28 22 the iterative analysis-phase, the researchers discussed the themes and alternatives, and it was proposed  
29 23 that the local health care context could influence the differences found between caring styles of the  
30 24 two groups of nurses. Therefore, the research teams introduced their local health care systems (**Box 3**)  
31 25 to each other and these insights were used in further interpretation of the findings. A summary of the  
32 26 final conclusions was returned to the participants for feedback.  
33  
34  
35  
36  
37  
38  
39  
40  
41  
42  
43  
44  
45

46 28 **Patient and public involvement**  
47 29

48 30 Patients were not involved in the design of this substudy of HATICE. However, patients were  
49 31 involved in the development of the HATICE eHealth application by means of focus groups with the  
50 32 projected target population of the HATICE eHealth application and by means of consulting patient  
51 33 organisations (Dutch Heart Foundation and Dutch and Finnish Alzheimer Association)<sup>26</sup>. Results of  
52 34 this substudy were disseminated to the participants by means of a written summary.  
53  
54  
55  
56  
57

58 36 **RESULTS**

59 37 We analysed the data from **Part 1** (the nurses' experiences and practices with supporting the process  
60

1 of behaviour change for cardiovascular prevention, including the potential for dementia prevention)  
2 (Part 1) and **Part 2** (the nurses' suggestions on how to integrate their experiences in an online-support  
3 setting, stimulated by a demonstration of the HATICE-platform<sup>26</sup>) together, jointly informing the  
4 identification of 3 main themes. The themes can be understood as the nurses' preconditions for  
5 effective behaviour change guidance in their patients: establishing a relationship of trust; awareness  
6 and expectation management; and appropriate timing and monitoring. These were regarded as being  
7 equally important in 'off-line' and 'on-line' health care. Below, they are reported separately in relation  
8 to **Parts 1** and **2**, to distinguish the nurses' clinical experiences and practices in current health care  
9 settings from their recommendations for optimal online support.

## **Part 1: Nurses' experiences and practices with supporting the process of behaviour change for cardiovascular prevention**

### **Preconditions for effective behaviour change guidance**

#### *Establishing a relationship of trust*

16 According to both the Finnish and Dutch nurses, the basis of behaviour change support lay in  
17 establishing a relationship of trust with the patient, i.e. developing a good nurse-patient relationship  
18 over time, in which the individual felt at ease and respected and comfortable enough to open up about  
19 lifestyle and behaviour issues:

21 *“For lifestyle change, for prevention, a relationship based on mutual trust is pivotal. It is good  
22 to have long-standing contact with people. Then you know what is going on in someone's life and in  
23 that, some kind of trust will grow, so that people really start believing what you are saying to them.  
24 And then, over time, people will start practising healthy behaviours that maybe they had no intention  
25 to follow, in the beginning”* (Dutch nurse 1)

27 The nurses reported personalising and tailoring their support to each patient as skills used in order to  
28 stimulate trust. For example:

30 *“And you need to get a good picture of the situation, so that you don't give the same  
31 information to everyone. That's of no use. You need to think what the central issues are for this  
32 patient. What are the things he or she seems to have resources for? What are the goals that the client  
33 sets? What is the client able to do, and with what kind of intensity? What will the time span be like?  
34 And I also ask my client directly what kind of support he or she would like. I try to offer what the client  
35 thinks he or she needs”* (Finnish nurse 1)

38 Interestingly, when further exploring these skills, the nurses expressed different preferences regarding  
39 the ideal mode of communication. The Dutch nurses emphasized the importance of repeated face-to-

1  
2  
3 1 face contact and in-person continuity to establish a good relationship. For Finnish nurses an initial  
4  
5 2 face-to-face contact only seemed sufficient to establish a working relationship:  
6  
7 3

8 4 *“And here [refers to the HATICE platform] the initial contact and information session at the*  
9 5 *beginning is very important because I guess a sort of a relationship needs to be established here as*  
10 6 *well. In the same way. There are still people behind this platform.”* (Finnish nurse 1)  
11 7

12 8  
13  
14 9 Thereafter, they were comfortable with further phone or email contact and did not regard this as less  
15  
16 10 personal than face-to-face contact. Email contact was also considered to have advantages:  
17  
18 11

19 12 *“But sometimes this kind of online communication could be less complicated...than face to*  
20 13 *face.”*(Finnish nurse 5)  
21 14

22 15 *“I have noticed in my work that some people prefer contacting me by e-mail and not by phone.*  
23 16 *[Others agree] On the phone they might think that they are disturbing me or that it's bad timing, but*  
24 17 *one can write an e-mail or something anytime.”* (Finnish nurse 3)  
25 18  
26 19

#### 20 *Awareness and expectation management*

21 A second precondition was awareness and expectation management: checking the patients' level of  
22 knowledge and expectations regarding prevention and personal cardiovascular risk. Nurses thought  
23 that most patients had considerable knowledge of cardiovascular disease prevention, especially in  
24 Finland, due to a long standing tradition of community based cardiovascular prevention (the North-  
25 Karelia project <sup>27</sup>). Nonetheless, both groups of nurses had experienced that people were not especially  
26 aware of their personal cardiovascular risk status:  
27  
28 29

30 30 *“That's it, isn't it. For many people, their health is not a concern yet. You can list them the*  
31 31 *facts, and they hear and read it everywhere, that it is unhealthy to be overweight and that they need to*  
32 32 *exercise more, but right now, they are not yet bothered by it.”* (Dutch nurse 6)  
33 33  
34 34

35 35 Because of this lack of a sense of urgency, the nurses regarded the ability to educate their patients  
36 36 about the consequences of health behaviours as an essential skill of their profession. Once awareness  
37 37 and motivation had grown, people often had unrealistic expectations and the nurses needed to act as  
38 38 *“myth busters”* (Finnish nurse 4):  
39 39  
40 40

41 41 *“And when we are, however, not able to offer the magic pills or wonder tricks, the clients may*  
42 42 *sometimes be disappointed when all I can suggest is these boring methods: diet and physical activity.*  
43 43 *And we cannot offer them a magic solution.”* (Finnish nurse 4)  
44 44  
45 45  
46 46  
47 47  
48 48  
49 49  
50 50  
51 51  
52 52  
53 53  
54 54  
55 55  
56 56  
57 57  
58 58  
59 59  
60 60



1  
2  
3 1 Often, once people were motivated to change their health behaviours, they also tended to set  
4 2 unrealistic goals, which the nurses then needed to bring back to realistic proportions:  
5  
6 3

7  
8 4 *“Start small. Do not make it too big. If you are obese, many people do not like it to go to the*  
9 5 *gym, they think the gym is only for lovely slim figures. You cannot convince them that that’s not true.*  
10 6 *Therefore, it is important: try things first yourself. What can you do with small steps at home by*  
11 7 *yourself, before going outside? You have to start liking exercise.”* (Dutch nurse 3)  
12 8

13  
14 9 Lastly, the nurses actively prepared their patients for failures during the process of behaviour change,  
15 10 as these were seen as inevitable:  
16  
17 11

18 12 *“I usually tell the patients that they’re allowed to fail; but even so, they are invited to, and*  
19 13 *they should come to the appointments. So then we can check the situation again, and set a new goal if*  
20 14 *needed.”* (Finnish nurse 1)  
21 15

22  
23 16 With the Finnish nurses, coaching on cardiovascular risk was also related to the potential for dementia  
24 17 prevention. They suggested that many patients feared dementia and lacked knowledge about the  
25 18 disease and treatment and prevention options, creating a stigma towards this condition. The nurses  
26 19 were aware of the link between cardiovascular disease and dementia, but felt they lacked sufficient  
27 20 knowledge and training to provide proper support:  
28  
29 21

30  
31 22 *“Well, we have not had knowledge of the reasons for dementia for that long. And these*  
32 23 *connections haven’t been...the research is recent: well, at least more recent than the research about*  
33 24 *heart diseases.”* (Finnish nurse 5)  
34 25  
35 26

36  
37 26 They found that educating patients on the link between cardiovascular disease and dementia, would be  
38 27 a good starting point to raise awareness. Potentially, this could enhance motivation for CV prevention:  
39 28  
40 29

41  
42 29 *“What is good for the heart - and we know what’s good for the heart – is also good for the*  
43 30 *brain, but not everyone knows this. I think this link would be good to be aware of: you protect your*  
44 31 *heart but also the most important part of your body which is the brain.”* (Finnish nurse 4)  
45 32  
46 33

### 47 33 *Appropriate timing and monitoring*

48 34 The third precondition mentioned by the nurses was appropriate timing and monitoring: providing  
49 35 professional support at appropriate times and monitoring the progress of the patient towards behaviour  
50 36 change. Regular follow-up appointments stimulated adherence and motivation:  
51 37  
52 38

53  
54 38 *“After three months, your plan fades away, your goal, your motivation.”* (Dutch nurse 3).  
55 39  
56 40

57 40 *“..that there is a possibility for follow-up. Usually it motivates people when someone looks*  
58 41 *after you: how are you progressing, no matter if the target is, for example, smoking cessation or*  
59 42 *increasing physical activity.”* (Finnish nurse 5)  
60 43



1  
2  
3 1 Monitoring ensured that the nurses could support their patients when they experienced obstacles or  
4 failures, although this could be difficult:  
5  
6  
7

8 4 *“Disappointments also play a role. For example: a guy with diabetes, he quit smoking but  
9 5 then his sugar levels went up and he needed to start with insulin. How do you explain that [to him]?”  
10 6 Well, I challenge you to keep his attitude up and to maintain his motivation.”* (Dutch nurse 5)  
11 7

12 8 When discussing monitoring lifestyle behaviours, both nurse groups attributed themselves a supportive  
13 9 role, putting the patient in charge, because lifestyle was seen as the patient’s personal domain.

14 10 However, regarding the medical components of preventive care (control of hypertension, diabetes and  
15 11 hypercholesterolemia), the Dutch nurses attributed a more directive role to themselves and the medical  
16 12 practice to avoid mistakes and complications. In contrast, the Finnish nurses regarded their patients as  
17 13 capable of staying in charge and described themselves as mentors:  
18

19 15 *“It is also one of the nurse’s responsibilities to be a contact person, support and a sort of  
20 16 mentor, and also to refer the patient to a doctor if the nurse notices that something is going wrong.”*  
21 17 (Finnish nurse 4)  
22 18

## 23 19 **Part 2: Integrating the nurses’ strategies into an online-support setting**

### 24 20 *Establishing a relationship of trust*

25 21 All of the nurses regarded the presence of a coach as being essential for guaranteeing personal support.  
26 22 The Finnish nurses felt that online coaching could successfully establish a relationship of trust,  
27 23 provided that the coach was a real person:  
28 24

29 25 *“Because of this social interaction on this website [the HATICE platform], the participant has  
30 26 a familiar and friendly person [as a coach] and not just some distant virtual coach who is a stranger.  
31 27 [...] it’s good that this combines the real-life person with the online contact, maybe it feels more  
32 28 comfortable and familiar [for the participant].”* (Finnish nurse 4)  
33 29

34 30 An initial face-to-face consultation with the patient could strengthen the establishment of a good  
35 31 relationship. Overall, for the Finnish nurses, online support was an obvious step forward in innovating  
36 32 healthcare:  
37 33

38 34 *“Well at least I think that this is absolutely the trend [others nod and agree], that all the  
39 35 services will be at least partly available online for the patients. Partly like this [via internet] and  
40 36 partly with human contact. I think that it’s an inevitable part of the future.”* (Finnish nurse 1)  
41 37

42 38 In contrast, the Dutch nurses could not imagine the platform and coach fully substituting their personal  
43 39 guidance:  
44 40

1  
2  
3 1 *“The strength of our guidance is the personal contact we have with the patients. [...] that*  
4 2 *enables us to give them some subtle support and give them a small push in the right direction. To*  
5 3 *delegate all of that to an online coach just like that, that seems difficult to me. Then all personal*  
6 4 *contact will disappear.”* (Dutch nurse 7)  
7 5

8  
9 6 *Awareness and expectation management*

10 7 All nurses regarded the internet-platform a suitable means to raise awareness and increase health-  
11 8 literacy. Managing expectations related to online support was considered very important, because  
12 9 misunderstandings could arise more easily through this method. Therefore, the coach should explain  
13 10 what could be expected from the platform and their support:  
14 11

15 12 *“Communication is very important in the beginning: what it is we do, and what do they expect*  
16 13 *from the goals.”* (Dutch nurse 1)  
17 14

18 15 *Appropriate timing and monitoring*

19 16 The nurses envisioned that online, the patient would be in charge of timing of support and monitoring  
20 17 of progress. The coach would have a reactive role, providing support in response to the patient’s  
21 18 demand. However, the nurses felt the coach also needed to be proactive, in case people showed signs  
22 19 of losing motivation. This would require insight into people’s activities on the platform:  
23 20

24 21 *“[...] the nurse can also see it [the diary] and check. If the participant fails to achieve the*  
25 22 *goals, the nurse can go back and check what might have been the problem.”* (Finnish nurse 5)  
26 23

27 24 Both groups thought the platform should be aligned to regular healthcare. The Finnish nurses  
28 25 envisioned that the online coach could work in the same fashion as the nurses currently did, targeting  
29 26 both lifestyle and medical components of their patient’s health. The Dutch nurses stressed that not  
30 27 everybody would be able to self-manage, and therefore would be in need of different intensities of  
31 28 coaching:  
32 29

33 30 *“I think 2 or 3 types of platform users will arise: people who really get the concept of self-*  
34 31 *management (and start coaching themselves), people who need the coach (and give the coach access*  
35 32 *to their complete profile) and a group in-between, alerting the coach if a goal has not been met.”*  
36 33 (Dutch nurse 2)  
37 34

38 35 While discussing this topic, they expressed ambivalence as to whether it was ‘safe’ to entrust their  
39 36 patients with self-management when it related to medical issues:  
40 37

41 38 *“I tend to think: if it is self-management, you shouldn't want to get yourself involved in that*  
42 39 *[medication use], you should leave that to the GP. On the other hand, if someone’s blood pressure is*  
43 40 *constantly rising, then you do want to know which medication someone is taking, to get the complete*  
44 41 *picture. Because then you check whether there might be a problem in medication-use.”* (Dutch nurse  
45 42 3)

1  
2  
3 1  
4 2 At the end of this discussion, for safety reasons, they concluded that they preferred a platform focusing  
5 3 on lifestyle only, leaving medical issues within the control of the GP practice.  
6 4  
7 5  
8  
9  
10  
11  
12  
13  
14  
15  
16  
17  
18  
19  
20  
21  
22  
23  
24  
25  
26  
27  
28  
29  
30  
31  
32  
33  
34  
35  
36  
37  
38  
39  
40  
41  
42  
43  
44  
45  
46  
47  
48  
49  
50  
51  
52  
53  
54  
55  
56  
57  
58  
59  
60

For peer review only

## 1 DISCUSSION

### 3 Principal findings and interpretation

4 In this international focus group study, we identified three main themes that both the Finnish and  
5 Dutch nurses emphasised as the most important preconditions for effective behaviour change support  
6 in cardiovascular prevention, and potentially, prevention of cognitive decline: (1) establishing a  
7 relationship of trust, (2) managing awareness and expectations and (3) appropriate timing and  
8 monitoring of the process of behaviour change. These preconditions were also regarded as important  
9 for providing optimal online support. The nurses stressed that a coach providing human support, and  
10 integration with regular care, were essential elements to achieve this. They expressed, however,  
11 different ideas on their implementation (**Figure 1**).

#### 13 **Figure 1.** Schematic visualisation of the main themes and their connections

15 As mentioned in the introduction, making and maintaining health behaviour change is notoriously  
16 complex. This was confirmed by the nurses we interviewed, but their clinical experience provided us  
17 with clear preconditions for optimal behaviour change support. The nurses used slightly different  
18 approaches to achieve these preconditions, both in their current practice and in their ideas regarding  
19 online support. To establish a relationship of trust, the Dutch nurses relied more on face-to-face  
20 contact than the Finnish nurses, which appeared to make them more sceptical about the effectiveness  
21 of online coaching. The Finnish nurses took a mainly supportive role in monitoring, whereas Dutch  
22 nurses emphasised a more directive role for themselves and the general practice, with regard to  
23 medical aspects of preventive guidance. This different attitude towards patient autonomy is of interest  
24 and may be influenced by different factors, including healthcare culture, geographical factors, nurse  
25 factors, and patient factors. Regarding health care culture, as described in **Box 3**, although aims of  
26 preventive care are very similar between Finland and the Netherlands, patient empowerment and  
27 patient autonomy have received more emphasis in Finland than in the Netherlands. The nurses' ideas  
28 about their own responsibilities and patient autonomy may be aligned with the way patient-autonomy  
29 is being shaped in the two healthcare systems as well as with the description of nurses' responsibilities  
30 in local cardiovascular risk management guidelines. The different attitudes about face-to-face contact  
31 can be further understood from a geographical perspective. Finland is a large but very sparsely  
32 populated country and the Netherlands is a very small but densely populated country. This has  
33 influenced current organisation and accessibility of care, and probably also attitudes towards care (see  
34 **Box 3**). In this perspective the step towards online care is likely to be smaller for the Finnish nurses.  
35 Last, the differences in the ages of the patient populations may also have influenced our findings, since  
36 the nurses might see more potential for eHealth applications in younger patients, who they might  
37 regard as being more autonomous in their health behaviours.

1  
2  
3 1 Our results concerning dementia prevention are very preliminary, but of special interest. The Finnish  
4 2 nurses liked the idea of including cognitive health as a goal for cardiovascular preventive care, as  
5 3 dementia was regarded as a growing public health problem, and a combined approach could increase  
6 4 people's motivation to engage in behaviour change. However, the nurses felt they could not provide  
7 5 proper support, given their limited knowledge and training on one hand, and the limited extent of  
8 6 conclusive scientific evidence on the other.  
9  
10  
11  
12  
13

### 14 8 **Strengths and limitations**

15 9 The HATICE project is novel in its aim to develop a generic innovative cardiovascular prevention  
16 10 strategy for older people that can be used across European healthcare systems, especially since it  
17 11 involves eHealth. Our qualitative research design enabled us to use the best practices of nurse experts  
18 12 in 'traditional' face-to-face cardiovascular preventive care to make recommendations for optimal  
19 13 health behaviour change support through novel internet-platforms. In qualitative research,  
20 14 international joint analyses are not common because of language barriers. To overcome these, we put  
21 15 much effort into the alignment of our research methodology. The frequent interactions and extensive  
22 16 meetings of the research teams enabled us to explore our findings in the context of the local health  
23 17 care systems. Following grounded theory methodology<sup>25</sup>, we deliberately selected nurses that we  
24 18 regarded experts in preventive cardiovascular care. Our research also has some limitations that may  
25 19 have influenced our findings. Information on non-participation was limited. The Finnish nurses had,  
26 20 on average, more years of clinical experience with CV prevention than the Dutch nurses. The patient  
27 21 populations of the Finnish and Dutch nurses were not identical with respect to age. Both of these  
28 22 factors may have influenced our findings. However, since the clinical experience of both groups was  
29 23 very similar, and both countries have similar aims for cardiovascular prevention, we deem the  
30 24 selection of these nurses appropriate for our research purpose. Since we only performed two focus  
31 25 groups, we cannot exclude that a wider range of views could have been collected. For example, one  
32 26 might expect that themes related to training and education requirements would have emerged more  
33 27 prominently from the discussions, but this issue only was mentioned with regard to cognitive health. A  
34 28 further limitation is that cognitive health was only discussed with the Finnish nurses. This issue should  
35 29 be elaborated further in future studies. The striking similarities in the principal themes found in both  
36 30 countries and the consistency of our findings with previous literature mitigates fears that our samples  
37 31 were too limited. Last, when reviewing a summary of our findings, the nurses confirmed that their  
38 32 experiences and views were reflected and did not add new ones, emphasising that the most relevant  
39 33 themes were captured.  
40  
41  
42  
43  
44  
45  
46  
47  
48  
49  
50  
51  
52  
53  
54

### 55 34 56 35 **Comparison with existing literature**

57 36 The importance of a relationship of trust, clarifying patients expectations and providing personally  
58 37 tailored support were also main themes in other European qualitative studies on cardiovascular

1  
2  
3 1 preventive care with nurses or patients<sup>28-32</sup>. The positive attitude of the Finnish nurses on self-  
4 2 management of medical issues was consistent with another Finnish study about nurses' and  
5 3 physicians' perceptions of patients' responsibilities in self-care<sup>33</sup>. The reserved attitude of the Dutch  
6 4 nurses was also reflected in a survey among Dutch healthcare professionals, where 50% feared that  
7 5 patients' direct access to their medical record would cause misunderstandings and unnecessary  
8 6 anxiety<sup>34</sup>. A recent qualitative systematic review on nurses' experiences of facilitators and barriers of  
9 7 using telehealth also reported both positive and negative attitudes of nurses towards telehealth. With  
10 8 regard to the nurse-patient relationship, nurses mentioned, on the positive side, that telehealth could  
11 9 improve trusting relationships and lower access to care. On the negative side, nurses reported that  
12 10 telehealth could lead to a loss of human contact. Differences in attitudes were not linked to local health  
13 11 care cultures<sup>35</sup>. Finally, the conviction of all nurses in our study that a coach was essential to  
14 12 complement the internet-platform, is supported by a meta-analysis we performed showing that  
15 13 internet-interventions combined with human support were more effective than 'stand-alone'  
16 14 interventions<sup>36</sup>.

### 15 **Implications for practice**

16 Finnish and Dutch nurses have similar experiences with and views on supporting behaviour change for  
17 18 cardiovascular prevention, but use different practical approaches towards their patients. Including the  
19 19 maintenance of cognitive health as a goal of cardiovascular prevention can provide novel opportunities  
20 20 to frame health behaviour change for both prevention of dementia and CVD, and might augment  
21 21 people's motivation for prevention, but this suggestion should be studied further. The nurses'  
22 22 experiences provide valuable directions for shaping online support in internet-platforms for  
23 23 cardiovascular self-management. This study also indicates that, when introducing new forms of  
24 24 preventive healthcare that involve patient self-management, like internet-platforms, local healthcare  
25  
26  
27  
28  
29  
30  
31  
32  
33  
34  
35  
36  
37  
38  
39  
40  
41  
42  
43  
44  
45  
46  
47  
48  
49  
50  
51  
52  
53  
54  
55  
56  
57  
58  
59  
60

## 1 ADDITIONAL INFORMATION

### 2 Contributors

3 Study design: CB, ER, EMvC, HS, FM and MK. Data acquisition: CB, MB and AR. Data analysis:  
4 CB, UA, MB and AR. Interpretation of results: CB, UA, MB, AR, FM, EMvC and JP. Drafting of the  
5 manuscript: CB. Critical revision of the manuscript for important intellectual content: all authors.

### 6 Funding

7 The research leading to these results has received funding from the European Union Seventh  
8 Framework Programme for the HATICE-project (FP7/2007-2013, grant agreement n° 305374) and the  
9 Multimodal preventive trials for Alzheimer's Disease: towards multinational strategies – programme  
10 (MIND-AD: MIND-AD Academy of Finland (grant agreement n°291803), MIND-AD VTR, Kuopio  
11 University Hospital ((grant agreement n°5772815) and MIND-AD Academy of Sweden (Swedish  
12 Research Council, 529-2014-7503)).

### 14 Competing interests

15 The authors have declared no competing interests.

### 17 Ethical approval

18 In the Netherlands, the study was presented to the medical ethics committee of the Academic Medical  
19 Centre in the Netherlands and a waiver was provided. In Finland, neither application for ethical  
20 approval nor a waiver was required. Written informed consent was obtained from all participants in  
21 both countries.

### 23 Data sharing statement

24 Data will not be made publicly available. Please contact the corresponding author for more  
25 information.

### 26 Acknowledgements

27 We thank all Finnish and Dutch nurses for their participation in the study, Suzanne Ligthart, Carin  
28 Miedema, Paulien Vermunt, Floor Rooskens (respectively discussion moderator, assistant-moderator  
29 and assistants in transcription and coding for the Dutch meetings), Lotta Salo, Ejja Pietilä  
30 (organisation and summary notes of the Finnish meeting) and Nicola Coley (review of written  
31 English) for their assistance to the study.



1  
2  
3 **1 REFERENCES**

- 4 2 1. Oliver D. 21st century health services for an ageing population: 10 challenges for general practice.  
5 3 *The British journal of general practice : the journal of the Royal College of General*  
6 4 *Practitioners* 2012;62(601):396-7. doi: 10.3399/bjgp12X653435 [published Online First:  
7 5 2012/08/08]
- 8 6 2. Wu YT, Fratiglioni L, Matthews FE, et al. Dementia in western Europe: epidemiological evidence  
9 7 and implications for policy making. *The Lancet Neurology* 2016;15(1):116-24. doi:  
10 8 10.1016/s1474-4422(15)00092-7 [published Online First: 2015/08/25]
- 11 9 3. de Bruijn RF, Bos MJ, Portegies ML, et al. The potential for prevention of dementia across two  
12 10 decades: the prospective, population-based Rotterdam Study. *BMC medicine* 2015;13:132.  
13 11 doi: 10.1186/s12916-015-0377-5 [published Online First: 2015/07/22]
- 14 12 4. Kivipelto M, Ngandu T, Laatikainen T, et al. Risk score for the prediction of dementia risk in 20  
15 13 years among middle aged people: a longitudinal, population-based study. *The Lancet*  
16 14 *Neurology* 2006;5(9):735-41. doi: 10.1016/s1474-4422(06)70537-3 [published Online First:  
17 15 2006/08/18]
- 18 16 5. Norton S, Matthews FE, Barnes DE, et al. Potential for primary prevention of Alzheimer's disease:  
19 17 an analysis of population-based data. *The Lancet Neurology* 2014;13(8):788-94. doi:  
20 18 10.1016/s1474-4422(14)70136-x [published Online First: 2014/07/18]
- 21 19 6. Peters R, Beckett N, Forette F, et al. Incident dementia and blood pressure lowering in the  
22 20 Hypertension in the Very Elderly Trial cognitive function assessment (HYVET-COG): a  
23 21 double-blind, placebo controlled trial. *The Lancet Neurology* 2008;7(8):683-9. doi:  
24 22 10.1016/s1474-4422(08)70143-1 [published Online First: 2008/07/11]
- 25 23 7. Leventhal H, Weinman J, Leventhal EA, et al. Health psychology: the search for pathways between  
26 24 behavior and health. *Annu Rev Psychol* 2008;59:477-505.
- 27 25 8. Rosenstock IM. The Health Belief Model and Preventive Health Behavior. *Health Education*  
28 26 *Monographs* 1974;2(4):354-86. doi: 10.1177/109019817400200405
- 29 27 9. Ajzen I. From Intentions to Actions: A Theory of Planned Behavior. In: Kuhl J, Beckmann J, eds.  
30 28 Action Control: From Cognition to Behavior. Berlin, Heidelberg: Springer Berlin Heidelberg  
31 29 1985:11-39.
- 32 30 10. Bandura A. Self-efficacy: Toward a unifying theory of behavioral change. *Psychological Review*  
33 31 1977;84(2):191-215. doi: 10.1037/0033-295X.84.2.191
- 34 32 11. Prochaska JO, DiClemente CC, Norcross JC. In search of how people change. Applications to  
35 33 addictive behaviors. *The American psychologist* 1992;47(9):1102-14. [published Online First:  
36 34 1992/09/01]
- 37 35 12. Weinstein ND. The precaution adoption process. *Health Psychology* 1988;7(4):355-86. doi:  
38 36 10.1037/0278-6133.7.4.355
- 39 37 13. Burke LE, Dunbar-Jacob JM, Hill MN. Compliance with cardiovascular disease prevention  
40 38 strategies: a review of the research. *Ann Behav Med* 1997;19(3):239-63.
- 41 39 14. Abraham C, Kelly MP, West R, et al. The UK national institute for health and clinical excellence  
42 40 public health guidance on behaviour change: A brief introduction. *Psychology, Health &*  
43 41 *Medicine* 2009;14(1):1-8. doi: 10.1080/13548500802537903
- 44 42 15. Busse R, Blümel M, Scheller-Kreinsen D, et al. Tackling chronic disease in Europe Strategies,  
45 43 interventions and challenges. *World Health Organization 2010, on behalf of the European*  
46 44 *Observatory on Health Systems and Policies* 2010;20
- 47 45 16. Bodenheimer TL, K.; Holman, H.; Grumbach, K. Patient Self-Management of Chronic Disease in  
48 46 Primary Care. *Jama* 2002;288(19):2469 - 75.
- 49 47 17. Lorig K, Holman H. Self-Management Education: History, Definition, Outcomes, and  
50 48 Mechanisms. *Ann Behav Med* 2003;26(1):1-7.
- 51 49 18. Griffiths F, Lindenmeyer A, Powell J, et al. Why are health care interventions delivered over the  
52 50 internet? A systematic review of the published literature. *Journal of medical Internet research*  
53 51 2006;8(2):e10. doi: 10.2196/jmir.8.2.e10 [published Online First: 2006/07/27]
- 54 52 19. Bennett GG, Glasgow RE. The delivery of public health interventions via the Internet: actualizing  
55 53 their potential. *Annual review of public health* 2009;30:273-92. doi:  
56 54 10.1146/annurev.publhealth.031308.100235 [published Online First: 2009/03/20]



- 1 20. Patnode CD, Evans CV, Senger CA, et al. U.S. Preventive Services Task Force Evidence  
2 Syntheses, formerly Systematic Evidence Reviews. Behavioral Counseling to Promote a  
3 Healthful Diet and Physical Activity for Cardiovascular Disease Prevention in Adults Without  
4 Known Cardiovascular Disease Risk Factors: Updated Systematic Review for the US  
5 Preventive Services Task Force. Rockville (MD): Agency for Healthcare Research and  
6 Quality (US) 2017.
- 7 21. Richard E, Jongstra S, Soininen H, et al. Healthy Ageing Through Internet Counselling in the  
8 Elderly: the HATICE randomised controlled trial for the prevention of cardiovascular disease  
9 and cognitive impairment. *BMJ Open* 2016;6(6):e010806. doi: 10.1136/bmjopen-2015-  
10 010806 [published Online First: 2016/06/12]
- 11 22. Glaser BG, Strauss AL. The discovery of grounded theory. *Aldine, Chicago* 1967
- 12 23. Strauss A, Corbin J. Grounded theory methodology. *Handbook of qualitative research* 1994:273-  
13 85.
- 14 24. Tong A, Sainsbury P, Craig J. Consolidated criteria for reporting qualitative research (COREQ): a  
15 32-item checklist for interviews and focus groups. *International Journal for Quality in Health  
16 Care* 2007;19(6):349-57. doi: 10.1093/intqhc/mzm042
- 17 25. Foley G, Timonen V. Using Grounded Theory Method to Capture and Analyze Health Care  
18 Experiences. *Health Services Research* 2015;50(4):1195-210. doi: 10.1111/1475-6773.12275
- 19 26. Jongstra S, Beishuizen C, Andrieu S, et al. Development and Validation of an Interactive Internet  
20 Platform for Older People: The Healthy Ageing Through Internet Counselling in the Elderly  
21 Study. *Telemedicine journal and e-health : the official journal of the American Telemedicine  
22 Association* 2016 doi: 10.1089/tmj.2016.0066 [published Online First: 2016/07/28]
- 23 27. Puska P, Nissinen A, Tuomilehto J, et al. The community-based strategy to prevent coronary heart  
24 disease: conclusions from the ten years of the North Karelia project. *Annual review of public  
25 health* 1985;6:147-93. doi: 10.1146/annurev.pu.06.050185.001051 [published Online First:  
26 1985/01/01]
- 27 28. Loon MS, van Dijk-de Vries A, van der Weijden T, et al. Ethical issues in cardiovascular risk  
28 management: Patients need nurses' support. *Nursing ethics* 2014;21(5):540-53. doi:  
29 10.1177/0969733013505313 [published Online First: 2013/11/22]
- 30 29. Ligthart SA, van den Eerenbeemt KD, Pols J, et al. Perspectives of older people engaging in nurse-  
31 led cardiovascular prevention programmes: a qualitative study in primary care in the  
32 Netherlands. *The British journal of general practice : the journal of the Royal College of  
33 General Practitioners* 2015;65(630):e41-8. doi: 10.3399/bjgp15X683149 [published Online  
34 First: 2014/12/31]
- 35 30. Brobeck E, Bergh H, Odencrants S, et al. Primary healthcare nurses' experiences with motivational  
36 interviewing in health promotion practice. *Journal of clinical nursing* 2011;20(23-24):3322-  
37 30. doi: 10.1111/j.1365-2702.2011.03874.x [published Online First: 2011/10/25]
- 38 31. Boase S, Mason D, Sutton S, et al. Tinkering and tailoring individual consultations: how practice  
39 nurses try to make cardiovascular risk communication meaningful. *Journal of clinical nursing*  
40 2012;21(17-18):2590-8. doi: 10.1111/j.1365-2702.2012.04167.x [published Online First:  
41 2012/07/14]
- 42 32. Hornsten A, Lindahl K, Persson K, et al. Strategies in health-promoting dialogues--primary  
43 healthcare nurses' perspectives--a qualitative study. *Scandinavian journal of caring sciences*  
44 2014;28(2):235-44. doi: 10.1111/scs.12045 [published Online First: 2013/04/19]
- 45 33. Jallinoja P, Absetz P, Kuronen R, et al. The dilemma of patient responsibility for lifestyle change:  
46 Perceptions among primary care physicians and nurses. *Scand J Prim Health Care*  
47 2007;25(4):244-49. doi: 10.1080/02813430701691778
- 48 34. Krijgsman J, Peeters J, Burghouts A, et al. Between the spark and the flame: 2015 eHealth  
49 monitor. *Nictiz and the NIVEL Institute [Dutch Institute for Research in the Healthcare  
50 Sector]* 2015;October
- 51 35. Koivunen M, Saranto K. Nursing professionals' experiences of the facilitators and barriers to the  
52 use of telehealth applications: a systematic review of qualitative studies. *Scandinavian journal  
53 of caring sciences* 2018;32(1):24-44. doi: 10.1111/scs.12445 [published Online First:  
54 2017/08/05]

- 1  
2  
3 1 36. Beishuizen CR, Stephan BC, van Gool WA, et al. Web-Based Interventions Targeting  
4 2 Cardiovascular Risk Factors in Middle-Aged and Older People: A Systematic Review and  
5 3 Meta-Analysis. *Journal of medical Internet research* 2016;18(3):e55. doi: 10.2196/jmir.5218  
6 4 [published Online First: 2016/03/13]  
7 5 37. Härmäläinen P, Reponen J, Winblad I. eHealth of Finland - Checkpoint 2008. 2009  
8 6 38. Säkkinen S, Heino A, Häkkinen P, et al. Statistical yearbook on social welfare and health care  
9 7 2015 - National Institute for Health and Welfare. 2016  
10 8 39. Vuorenkoski L, Mladovsky P, Mossialos E. Finland: Health system review. *Health Systems in*  
11 9 *Transition* 2008;10(4):1-168.  
12 10 40. Ministry of Public Health, Welfare and Sport - Healthcare in the Netherlands. 2016  
13 11 41. Schäfer W, Kroneman M, Boerma W, et al. The Netherlands: Health system review *Health*  
14 12 *Systems in Transition* 2010;12(1):1-229.  
15 13 42. Kringos D, Boerma W, Bourgueil Y, et al. The strength of primary care in Europe: an international  
16 14 comparative study. *The British journal of general practice : the journal of the Royal College*  
17 15 *of General Practitioners* 2013;63(616):e742-e50. doi: 10.3399/bjgp13X674422  
18 16 43. <http://www.kaypahoito.fi/web/english/guidelineabstracts/guideline?id=ccs00014> [Finnish Current  
19 17 Care Guideline on hypertension (2014)]. accessed 7-12-2016 2016.  
20 18 44. <http://www.kaypahoito.fi/web/english/guidelineabstracts/guideline?id=ccs00032> [Finnish Current  
21 19 Care Guideline on diabetes (2016)]. accessed 7-12-2016 2016.  
22 20 45. <http://www.kaypahoito.fi/web/english/guidelineabstracts/guideline?id=ccs00055> [Finnish Current  
23 21 Care Guideline on dyslipidaemias (2013)]. accessed 7-12-2016 2016.  
24 22 46. Boomsma L, Lakerveld-Heyl K, Gorter K, et al. Landelijke Eerstelijns Samenwerkings Afspraak  
25 23 Diabetes mellitus type 2. *Huisarts Wet* 2006;49(8):418-24.  
26 24 47. den Boer J. Protocolair CVRM: Nederlands Huisartsen Genootschap 2016.  
27 25 48. Faber E, De Bont M, Beusmans G, et al. Landelijke Eerstelijns Samenwerkings Afspraak CVA.  
28 26 *Huisarts Wet* 2007;50(3):S5-S8.  
29 27 49. <http://www.kanta.fi/en> [Website of the Finnish Patient Data Repository, where Finnish people can  
30 28 access their own medical record]. accessed 7-12-2016 2016.  
31 29  
32 30  
33 31  
34  
35  
36  
37  
38  
39  
40  
41  
42  
43  
44  
45  
46  
47  
48  
49  
50  
51  
52  
53  
54  
55  
56  
57  
58  
59  
60

1 **BOXES**

2

3 **Box 1: the Finnish and Dutch primary care systems**

|                                              | Finland                                                                                                                                                                                                                                                                                                                                                                  | The Netherlands                                                                                                                                                                                                                                                                                                         |
|----------------------------------------------|--------------------------------------------------------------------------------------------------------------------------------------------------------------------------------------------------------------------------------------------------------------------------------------------------------------------------------------------------------------------------|-------------------------------------------------------------------------------------------------------------------------------------------------------------------------------------------------------------------------------------------------------------------------------------------------------------------------|
| Organisation                                 | Primary care is delivered through public healthcare centres and through occupational health facilities <sup>37-39</sup> . Companies offer occupational health facilities to their employees, including both preventive and curative health services, delivered through semi-private healthcare centres that work with nurses in a similar fashion to the public centres. | General practices or small health care centres. In most general practices, continuity of care is ensured by allocating the patient to one GP.                                                                                                                                                                           |
| Main focus                                   | Primary care has a strong position and important gatekeeper function. Health promotion and disease prevention have been the main focus of health care policy for decades.                                                                                                                                                                                                | Access to care for everyone and solidarity through medical insurance <sup>40 41</sup> . GPs are gatekeepers of the healthcare system and provide acute, chronic and preventive care.                                                                                                                                    |
| Accessibility                                | Often, healthcare centres cover large geographical areas that are sparsely populated and often have staff shortages, contributing to long waiting lists and lack of personal continuity of care. Due to these waiting lists, many employees go to their occupational health service instead.                                                                             | Since the Netherlands is densely populated, people often live within a short distance of their general practice. Access to GPs is efficient; there are no waiting lists <sup>42</sup> .                                                                                                                                 |
| Role of primary care nurses                  | Important position: nurses work in close collaboration with GPs and have their own consulting hours to assess patients. Regarding cardiovascular prevention, they monitor patients with diabetes, hypertension and dyslipidaemia, as described in national guidelines <sup>43-45</sup> .                                                                                 | Important position: for several decades, GPs have delegated tasks to practice nurses in chronic disease management. Currently, nurses provide a substantial part of cardiovascular risk management care, including diabetes care, following regional and national guidelines and work descriptions <sup>9 46-48</sup> . |
| Patient autonomy and eHealth culture to date | The first European country to introduce a law (in 1993) defining the patient's right to access to all medical information and the right to autonomy (patient's informed consent for any medical treatment). All                                                                                                                                                          | Informed consent is ensured by law, but in daily practice, consent is often assumed and only explicitly discussed when treatment options can have far-reaching consequences <sup>41</sup> . Almost all GPs use electronic medical                                                                                       |

|  |                                                                                                                                                                                                     |                                                                                                             |
|--|-----------------------------------------------------------------------------------------------------------------------------------------------------------------------------------------------------|-------------------------------------------------------------------------------------------------------------|
|  | healthcare centres use electronic medical records. A national patient data repository is under development to provide patients complete access to their own electronic medical record <sup>49</sup> | records. Patients have the right to inspect their medical records, but do not have complete access to them. |
|--|-----------------------------------------------------------------------------------------------------------------------------------------------------------------------------------------------------|-------------------------------------------------------------------------------------------------------------|

## Box 2. Main topics discussed

### Part 1

- Prevention of cardiovascular disease and dementia: attitude and experiences
- Good guidance of behaviour change
- Relationship with the patient

### Part 2

- Attitude towards the internet-platform and online-support
- Role and responsibilities of the internet-coach
- Interaction with the patients online

## Box 3. Key features of the HATICE internet-platform with coaching

- Patient-centred: the patient can login on to a personal portal to review and manage his/her personal cardiovascular risk profile
- Improving health knowledge: the patient can access educational modules about cardiovascular risk factors and lifestyle
- Goal setting and self-monitoring: the patient can set his/her own goals for behaviour change and monitor how he/she is doing by entering self-measurements or keeping a diary
- Coaching: the coach monitors the patient's self-management and they can communicate online through messages

1  
2  
3  
4  
5  
6  
7  
8  
9  
10  
11  
12  
13  
14  
15  
16  
17  
18  
19  
20  
21  
22  
23  
24  
25  
26  
27  
28  
29  
30  
31  
32  
33  
34  
35  
36  
37  
38  
39  
40  
41  
42  
43  
44  
45  
46  
47  
48  
49  
50  
51  
52  
53  
54  
55  
56  
57  
58  
59  
60

1

For peer review only



Caption: Figure 1. Schematic visualization of the main themes and their connections  
 Legend: Left, the three main preconditions for good behaviour change guidance in cardiovascular preventive care that both Finnish and Dutch nurses identified, are depicted. Right of this, it is shown how the Finnish and Dutch nurses suggest to realise these preconditions in the online setting. Since there were differences between the nurses this is depicted separately for the Finnish and Dutch nurses. Below it is shown that local health practices influenced both the preconditions (and their operationalization (not shown in figure but explained in results section)) and the integration into online support.

194x99mm (300 x 300 DPI)

**APPENDIX 1 to ‘Integrating nurses’ experiences with supporting behaviour change for cardiovascular prevention into a self-management internet-platform in Finland and the Netherlands: a qualitative study’**

**Appendix 1: COREQ checklist**

| No.                                     | Item                                                                    | Explanation                                                                                                                                                                                                                                                                                                                          | Reported on page no.       |
|-----------------------------------------|-------------------------------------------------------------------------|--------------------------------------------------------------------------------------------------------------------------------------------------------------------------------------------------------------------------------------------------------------------------------------------------------------------------------------|----------------------------|
| Domain 1: Research team and reflexivity |                                                                         |                                                                                                                                                                                                                                                                                                                                      |                            |
| 1                                       | Interviewers                                                            | NL: Pols AJ and Ligthart S<br>FI: Rosenberg A                                                                                                                                                                                                                                                                                        | Not reported in manuscript |
| 2                                       | Credentials of the researchers involved in data collection and analysis | NL: Beishuizen CRL: MD PhD-student; Rooskens F: BSc; Ligthart S: MD, PhD-student; Pols AJ: prof; Moll van Charante EP: MD PhD<br>FI: Akenine U: PhD-student; Barbera M: PhD; Rosenberg A: PhD-student                                                                                                                                | Not reported in manuscript |
| 3                                       | Occupation of the researchers involved in data collection and analysis  | NL: Beishuizen CRL: PhD-student; Rooskens F: medical student; Ligthart S: general practitioner in training, PhD-student; Pols AJ: professor in medical ethics; Moll van Charante EP: postdoc researcher, general practitioner<br>FI: Akenine U: PhD-student, research nurse; Barbera M: postdoc researcher; Rosenberg A: PhD-student | Not reported in manuscript |
| 4                                       | Gender                                                                  | All researchers are female, except for Moll van Charante EP, who is male                                                                                                                                                                                                                                                             | Not reported in manuscript |
| 5                                       | Experience and training                                                 | See main text                                                                                                                                                                                                                                                                                                                        | p5                         |
| 6                                       | Relationship established                                                | NL: there was an indirect relationship between research team and the participants, because the nurses had been involved in a previous research project of the research team in which 2 researchers (Ligthart S and Moll van Charante EP) were also involved<br>FI: no previous relationship established                              | Not reported in manuscript |
| 7                                       | Participant knowledge of the                                            | NL: participants knew the professional background of the moderators                                                                                                                                                                                                                                                                  | Not reported in            |

|                        |                                       |                                                                                                                                                                                                                                                                                     |                            |
|------------------------|---------------------------------------|-------------------------------------------------------------------------------------------------------------------------------------------------------------------------------------------------------------------------------------------------------------------------------------|----------------------------|
|                        | interviewer                           | FI: participants knew the professional background of the moderator                                                                                                                                                                                                                  | manuscript                 |
| 8                      | Interviewer characteristics           | NL: Pols AJ conducts qualitative research on the ethics of use of technology and eHealth in medical care. Ligthart S conducts quantitative and qualitative research on cardiovascular prevention in older people<br><br>FI: Rosenberg A conducts research on prevention of dementia | Not reported in manuscript |
| Domain 2: Study design |                                       |                                                                                                                                                                                                                                                                                     |                            |
| 9                      | Methodological information and theory | See main text                                                                                                                                                                                                                                                                       | P5 and p6                  |
| 10                     | Sampling                              | See main text                                                                                                                                                                                                                                                                       | P5                         |
| 11                     | Method of approach                    | See main text                                                                                                                                                                                                                                                                       | P5                         |
| 12                     | Sample size                           | See main text                                                                                                                                                                                                                                                                       | P5                         |
| 13                     | Non-participation                     | See main text                                                                                                                                                                                                                                                                       | P5                         |
| 14                     | Setting of data collection            | See main text                                                                                                                                                                                                                                                                       | P5                         |
| 15                     | Presence of non-participants          | NL: Eric Moll- van Charante and Pim Happel were present as non-participating audience<br><br>FI: no others were present                                                                                                                                                             | Not reported in manuscript |
| 16                     | Description of sample                 | See main text                                                                                                                                                                                                                                                                       | P5 and p6                  |
| 17                     | Interview guide                       | See main text                                                                                                                                                                                                                                                                       | P6                         |
| 18                     | Repeat interviews                     | Not performed                                                                                                                                                                                                                                                                       |                            |
| 19                     | Audio/visual recording                | See main text                                                                                                                                                                                                                                                                       | P6                         |
| 20                     | Field notes                           | See main text                                                                                                                                                                                                                                                                       | P6                         |
| 21                     | Duration                              | See main text                                                                                                                                                                                                                                                                       | P6                         |



|                                 |                                |                                                                                                                                                                                                                                                                                                                                                                                                             |                            |
|---------------------------------|--------------------------------|-------------------------------------------------------------------------------------------------------------------------------------------------------------------------------------------------------------------------------------------------------------------------------------------------------------------------------------------------------------------------------------------------------------|----------------------------|
| 22                              | Data saturation                | See main text                                                                                                                                                                                                                                                                                                                                                                                               | P7 and P15                 |
| 23                              | Transcripts returned           | Not performed                                                                                                                                                                                                                                                                                                                                                                                               |                            |
| Domain 3: analysis and findings |                                |                                                                                                                                                                                                                                                                                                                                                                                                             |                            |
| 24                              | Number of data coders          | NL: 2<br>FI: 2                                                                                                                                                                                                                                                                                                                                                                                              | P6                         |
| 25                              | Description of the coding tree | See main text (figure 1)                                                                                                                                                                                                                                                                                                                                                                                    | p14                        |
| 26                              | Derivation of themes           | See main text                                                                                                                                                                                                                                                                                                                                                                                               | P6                         |
| 27                              | Software                       | No special qualitative software was used                                                                                                                                                                                                                                                                                                                                                                    |                            |
| 28                              | Participant checking           | See main text                                                                                                                                                                                                                                                                                                                                                                                               | P7 and p15                 |
| 29                              | Quotations presented           | See main text                                                                                                                                                                                                                                                                                                                                                                                               | P8– p13                    |
| 30                              | Data and findings consistent   | See main text                                                                                                                                                                                                                                                                                                                                                                                               | P8 – p13                   |
| 31                              | Clarity of major themes        | See main text and figure 1                                                                                                                                                                                                                                                                                                                                                                                  | P8-p14                     |
| 32                              | Clarity of minor themes        | <p>Within the groups, the Dutch and Finnish nurses shared opinions and experiences on most topics. Between the Dutch and Finnish groups, some interesting differences in opinions and experiences were identified. We choose therefore to focus on these differences when presenting our results, but not on diverse cases within the groups.</p> <p>Minor themes were not discussed due to word limits</p> | Not reported in manuscript |

**APPENDIX 2 to 'Integrating nurses' experiences with supporting behaviour change for cardiovascular prevention into a self-management internet-platform in Finland and the Netherlands: a qualitative study'**

**Appendix 2:** Topic list

| <b>FOCUS GROUP nurses part ONE cardiovascular prevention</b>                                                                                                                                                                                                                                                           |                                                                     |                                                                                                                                                                                                                                                    |
|------------------------------------------------------------------------------------------------------------------------------------------------------------------------------------------------------------------------------------------------------------------------------------------------------------------------|---------------------------------------------------------------------|----------------------------------------------------------------------------------------------------------------------------------------------------------------------------------------------------------------------------------------------------|
| <b>Overview part one</b>                                                                                                                                                                                                                                                                                               | <b>Topic (possible items)</b>                                       | <b>Possible questions</b>                                                                                                                                                                                                                          |
| <i>Aim of the meeting is to learn from the nurses' experiences in cardiovascular prevention: what are best practices to stimulate behaviour change, what is their attitude towards a prevention program for older people via the internet, how would they support people in lifestyle change through the internet?</i> |                                                                     |                                                                                                                                                                                                                                                    |
|                                                                                                                                                                                                                                                                                                                        | <b>CVD prevention</b>                                               |                                                                                                                                                                                                                                                    |
|                                                                                                                                                                                                                                                                                                                        | Activities on CVD prevention                                        | Do you currently conduct activities on CVD prevention?                                                                                                                                                                                             |
|                                                                                                                                                                                                                                                                                                                        | Experiences / lessons learned                                       | What are your experiences and lessons learned, especially regarding giving 'medical' guidance versus giving lifestyle guidance and regarding behavior change?                                                                                      |
|                                                                                                                                                                                                                                                                                                                        | <b>Dementia prevention</b>                                          | In the last decade, we got more and more indications from neurological research that risk factors for cardiovascular disease are also risk factors for dementia. So, possibly, reducing cardiovascular risk may also postpone or prevent dementia. |
|                                                                                                                                                                                                                                                                                                                        | Attitude towards dementia prevention                                | What is your attitude / your ideas regarding dementia prevention?                                                                                                                                                                                  |
|                                                                                                                                                                                                                                                                                                                        | Awareness of dementia risk and compliance to lifestyle change       | Most people are not yet aware of the association between CV risk and dementia, but do seem to be very afraid of dementia. Do you think that more awareness would enhance compliance/adherence to lifestyle change? What are your ideas on this?    |
|                                                                                                                                                                                                                                                                                                                        | <b>Relationship with participants and regular healthcare system</b> |                                                                                                                                                                                                                                                    |
|                                                                                                                                                                                                                                                                                                                        | Guiding lifestyle change                                            | Which factors could contribute to good guidance of lifestyle change?                                                                                                                                                                               |
|                                                                                                                                                                                                                                                                                                                        | Relationship with patient                                           | Which factors could contribute to a good relationship with your patient?                                                                                                                                                                           |
|                                                                                                                                                                                                                                                                                                                        | Relation with GP and regular practice assistant                     | How should the platform coach link with the patients' GP and regular practice assistant/nurse (the regular healthcare system)?                                                                                                                     |

|                                                                                                                           |                                           |                                                                                                                                |
|---------------------------------------------------------------------------------------------------------------------------|-------------------------------------------|--------------------------------------------------------------------------------------------------------------------------------|
|                                                                                                                           | Attitude towards internet intervention    | What is your attitude towards a prevention program via the internet (with support from a coach)?                               |
|                                                                                                                           |                                           | How should the platform coach link with the patients' GP and regular practice assistant/nurse (the regular healthcare system)? |
| <b>FOCUS GROUP nurses part TWO The platform</b>                                                                           |                                           |                                                                                                                                |
| <i>Assistant moderator explains about HATICE and platform by showing the powerpoint with screen shots of the platform</i> |                                           |                                                                                                                                |
|                                                                                                                           | <b>Information required for support</b>   | Imagine yourself being a coach using the internet-platform:                                                                    |
|                                                                                                                           |                                           | Which kind of information regarding the participants do you need to be able to support them?                                   |
|                                                                                                                           | <b>Role and responsibilities</b>          |                                                                                                                                |
|                                                                                                                           | Responsibility goal setting               | Who is responsible for goal setting? (capability of patients)                                                                  |
|                                                                                                                           | Role in lifestyle groups                  | How do you see your role in creating lifestyle groups and how can participation be encouraged?                                 |
|                                                                                                                           | <b>Interaction with participants</b>      |                                                                                                                                |
|                                                                                                                           | Experience with motivational interviewing | Do you have experience with motivational interviewing, how could this technique be used by the coach?                          |
|                                                                                                                           | Frequency of contact                      | How often would you like to have contact with your patient?                                                                    |
|                                                                                                                           | Mode of communication                     | Which mode of communication do you prefer? (phone, skype +/- webcam, email, chat...)                                           |
|                                                                                                                           | Network of support                        | What should be the role of the participant network of support in lifestyle change and how can this network be engaged?         |
|                                                                                                                           | Alerts / reminders                        | Do you like to receive automatic alerts/reminders when patients have alarming values or did not log-on?                        |
| <i>Assistant moderator and moderator verify key messages from focus group</i>                                             |                                           |                                                                                                                                |
| <i>Moderator thanks nurses</i>                                                                                            |                                           |                                                                                                                                |
