# Supplementary material for: Integrating nurses’ experiences with supporting behaviour change for cardiovascular prevention into a self-management internet platform in Finland and the Netherlands: a qualitative study
Source: PubMed Central journal article supplement (PMC6577411; doi:10.1136/bmjopen-2018-023480), 2019-06-06
Supplement: bmjopen-2018-023480supp001.pdf [file bmjopen-2018-023480supp001.pdf]

**APPENDIX 1 to ‘Integrating nurses’ experiences with supporting behaviour change for cardiovascular prevention into a self-management internet-platform in Finland and the Netherlands: a qualitative study’**

**Appendix 1: COREQ checklist**

| No.                                     | Item                                                                    | Explanation                                                                                                                                                                                                                                                                                                                              | Reported on page no.       |
|-----------------------------------------|-------------------------------------------------------------------------|------------------------------------------------------------------------------------------------------------------------------------------------------------------------------------------------------------------------------------------------------------------------------------------------------------------------------------------|----------------------------|
| Domain 1: Research team and reflexivity |                                                                         |                                                                                                                                                                                                                                                                                                                                          |                            |
| 1                                       | Interviewers                                                            | NL: Pols AJ and Ligthart S<br>FI: Rosenberg A                                                                                                                                                                                                                                                                                            | Not reported in manuscript |
| 2                                       | Credentials of the researchers involved in data collection and analysis | NL: Beishuizen CRL: MD PhD-student; Rooskens F: BSc; Ligthart S: MD, PhD-student; Pols AJ: prof; Moll van Charante EP: MD PhD<br><br>FI: Akenine U: PhD-student; Barbera M: PhD; Rosenberg A: PhD-student                                                                                                                                | Not reported in manuscript |
| 3                                       | Occupation of the researchers involved in data collection and analysis  | NL: Beishuizen CRL: PhD-student; Rooskens F: medical student; Ligthart S: general practitioner in training, PhD-student; Pols AJ: professor in medical ethics; Moll van Charante EP: postdoc researcher, general practitioner<br><br>FI: Akenine U: PhD-student, research nurse; Barbera M: postdoc researcher; Rosenberg A: PhD-student | Not reported in manuscript |
| 4                                       | Gender                                                                  | All researchers are female, except for Moll van Charante EP, who is male                                                                                                                                                                                                                                                                 | Not reported in manuscript |
| 5                                       | Experience and training                                                 | See main text                                                                                                                                                                                                                                                                                                                            | p5                         |
| 6                                       | Relationship established                                                | NL: there was an indirect relationship between research team and the participants, because the nurses had been involved in a previous research project of the research team in which 2 researchers (Ligthart S and Moll van Charante EP) were also involved<br><br>FI: no previous relationship established                              | Not reported in manuscript |
| 7                                       | Participant knowledge of the                                            | NL: participants knew the professional background of the moderators                                                                                                                                                                                                                                                                      | Not reported in            |

|                        |                                       |                                                                                                                                                                                                                                                                                     |                            |
|------------------------|---------------------------------------|-------------------------------------------------------------------------------------------------------------------------------------------------------------------------------------------------------------------------------------------------------------------------------------|----------------------------|
|                        | interviewer                           | FI: participants knew the professional background of the moderator                                                                                                                                                                                                                  | manuscript                 |
| 8                      | Interviewer characteristics           | NL: Pols AJ conducts qualitative research on the ethics of use of technology and eHealth in medical care. Ligthart S conducts quantitative and qualitative research on cardiovascular prevention in older people<br><br>FI: Rosenberg A conducts research on prevention of dementia | Not reported in manuscript |
| Domain 2: Study design |                                       |                                                                                                                                                                                                                                                                                     |                            |
| 9                      | Methodological information and theory | See main text                                                                                                                                                                                                                                                                       | P5 and p6                  |
| 10                     | Sampling                              | See main text                                                                                                                                                                                                                                                                       | P5                         |
| 11                     | Method of approach                    | See main text                                                                                                                                                                                                                                                                       | P5                         |
| 12                     | Sample size                           | See main text                                                                                                                                                                                                                                                                       | P5                         |
| 13                     | Non-participation                     | See main text                                                                                                                                                                                                                                                                       | P5                         |
| 14                     | Setting of data collection            | See main text                                                                                                                                                                                                                                                                       | P5                         |
| 15                     | Presence of non-participants          | NL: Eric Moll- van Charante and Pim Happel were present as non-participating audience<br><br>FI: no others were present                                                                                                                                                             | Not reported in manuscript |
| 16                     | Description of sample                 | See main text                                                                                                                                                                                                                                                                       | P5 and p6                  |
| 17                     | Interview guide                       | See main text                                                                                                                                                                                                                                                                       | P6                         |
| 18                     | Repeat interviews                     | Not performed                                                                                                                                                                                                                                                                       |                            |
| 19                     | Audio/visual recording                | See main text                                                                                                                                                                                                                                                                       | P6                         |
| 20                     | Field notes                           | See main text                                                                                                                                                                                                                                                                       | P6                         |
| 21                     | Duration                              | See main text                                                                                                                                                                                                                                                                       | P6                         |

|                                 |                                |                                                                                                                                                                                                                                                                                                                                                                                                             |                            |
|---------------------------------|--------------------------------|-------------------------------------------------------------------------------------------------------------------------------------------------------------------------------------------------------------------------------------------------------------------------------------------------------------------------------------------------------------------------------------------------------------|----------------------------|
| 22                              | Data saturation                | See main text                                                                                                                                                                                                                                                                                                                                                                                               | P7 and P15                 |
| 23                              | Transcripts returned           | Not performed                                                                                                                                                                                                                                                                                                                                                                                               |                            |
| Domain 3: analysis and findings |                                |                                                                                                                                                                                                                                                                                                                                                                                                             |                            |
| 24                              | Number of data coders          | NL: 2<br>FI: 2                                                                                                                                                                                                                                                                                                                                                                                              | P6                         |
| 25                              | Description of the coding tree | See main text (figure 1)                                                                                                                                                                                                                                                                                                                                                                                    | p14                        |
| 26                              | Derivation of themes           | See main text                                                                                                                                                                                                                                                                                                                                                                                               | P6                         |
| 27                              | Software                       | No special qualitative software was used                                                                                                                                                                                                                                                                                                                                                                    |                            |
| 28                              | Participant checking           | See main text                                                                                                                                                                                                                                                                                                                                                                                               | P7 and p15                 |
| 29                              | Quotations presented           | See main text                                                                                                                                                                                                                                                                                                                                                                                               | P8– p13                    |
| 30                              | Data and findings consistent   | See main text                                                                                                                                                                                                                                                                                                                                                                                               | P8 – p13                   |
| 31                              | Clarity of major themes        | See main text and figure 1                                                                                                                                                                                                                                                                                                                                                                                  | P8-p14                     |
| 32                              | Clarity of minor themes        | <p>Within the groups, the Dutch and Finnish nurses shared opinions and experiences on most topics. Between the Dutch and Finnish groups, some interesting differences in opinions and experiences were identified. We choose therefore to focus on these differences when presenting our results, but not on diverse cases within the groups.</p> <p>Minor themes were not discussed due to word limits</p> | Not reported in manuscript |
